# Supplementary material for: Hydrogen-bond activation enables aziridination of unactivated olefins with simple iminoiodinanes
Source: publisher site journal article supplement (doi:10.3762/bjoc.20.197), 2024-09-11
Supplement: Additional file 1 [file 1860-5397-20-197-S1.pdf]

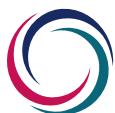

## Supporting Information

for

### Hydrogen-bond activation enables aziridination of unactivated olefins with simple iminoiodinanes

Phong Thai, Lauv Patel, Diyasha Manna and David C. Powers

*Beilstein J. Org. Chem.* **2024**, *20*, 2305–2312. doi:10.3762/bjoc.20.197

### Experimental procedures and characterization data, original spectra of new compounds, and optimization details

## Supporting Information

### Table of Contents

|                                                                           |            |
|---------------------------------------------------------------------------|------------|
| <b>A. General considerations</b>                                          | <b>S3</b>  |
| A.1 Materials                                                             | S3         |
| A.2 Characterization details                                              | S3         |
| A.3 Electrochemical experiment details.                                   | S4         |
| <b>B. Synthesis and characterization</b>                                  | <b>S5</b>  |
| B.1 Iminoiodinane reagents                                                | S5         |
| B.1.1 Synthesis of arylsulfonamide precursors ( <b>S1</b> )               | S5         |
| B.1.2 Synthesis of iminoiodinane derivatives ( <b>2</b> )                 | S7         |
| B.2 Aliphatic olefins                                                     | S11        |
| B.3 Aziridination of aliphatic olefins using PhINTs                       | S13        |
| B.4 Aziridination of cyclopentene using iminoiodinane derivatives         | S19        |
| B.5 Aziridination of cyclopentene using in situ iminoiodinane derivatives | S22        |
| <b>C. Reaction optimization studies</b>                                   | <b>S24</b> |
| C.1 Optimization of aliphatic olefin aziridination                        | S24        |
| C.2 Challenging reaction partners                                         | S32        |
| <b>D. Evaluation of aziridination mechanism</b>                           | <b>S34</b> |
| <b>E. NMR Spectra for new compounds</b>                                   | <b>S40</b> |
| <b>F. Supplementary references</b>                                        | <b>S69</b> |

## A. General considerations

**A.1 Materials** All chemicals and solvents were obtained as ACS reagent grade and used as received. Potassium carbonate, vinylcyclohexane (**1e**), *trans*-4-octene ((*E*)-**1m**), and *cis*-4-octene ((*Z*)-**1m**) were purchased from BTC. 2,3,4,5,6-Pentafluorobenzenesulfonyl chloride was purchased from Matrix. Cyclohexene (**1a**), allylbenzene (**1f**), but-3-en-1-ylbenzene (**1g**), *trans*- $\beta$ -methylstyrene ((*E*)-**1n**), 4-methylbenzenesulfonamide (**4**), isonicotinic acid, 1,3,5-trimethoxybenzene, triethyl benzene-1,3,5-tricarboxylate, boron trifluoride diethyl etherate (BF<sub>3</sub>·OEt<sub>2</sub>), methanol, ether, hexanes, ethyl acetate, and tetrahydrofuran were purchased from Sigma-Aldrich. Cyclopentene (**1b**), cycloheptene (**1c**), benzenesulfonyl chloride, and 4-nitrobenzenesulfonyl chloride were purchased from TCI. *N-tert*-Butyl- $\alpha$ -phenylnitrone and silver nitrate were purchased from Alfa Aesar. *N,N*-Dimethylformamide, concentrated hydrochloric acid, and aqueous ammonia (33%) were purchased from VWR. *cis*- $\beta$ -Methylstyrene ((*Z*)-**1n**), 3,3,3-trichloroethyl sulfamate, 4-methoxybenzenesulfonamide, 5-methylpyridine-2-sulfonamide, and zinc trifluoromethanesulfonate (Zn(OTf)<sub>2</sub>) were purchased from Ambeed. 1-Hexene (**1d**), 6-chloro-1-hexene (**1i**), 6-bromo-1-hexene (**1j**), hex-5-en-1-ol (**1l**), cyclohexa-1,4-diene (**1q**), phenyl- $\lambda^3$ -iodanediyl diacetate, trifluoromethanesulfonamide, 2,6-difluorobenzenesulfonamide, trifluoromethanesulfonic acid (TfOH), 2-methylbenzenesulfonamide, celecoxib, benzoic acid, and ibuprofen were purchased from Oakwood. 1,1,1,3,3,3-Hexafluoro-2-propanol (HFIP) and 2,2,2-trifluoroethanol (TFE) were obtained from Oakwood, then refluxed for 12 h under N<sub>2</sub> over 4 Å molecular sieves, distilled, and stored in a Straus flask [1]. Dry dichloromethane and acetonitrile (purchased from Fisher scientific, HPLC grade) were obtained from a drying column and stored over activated 4 Å molecular sieves [2]. NMR solvents were purchased from Cambridge Isotope Laboratories and were used as received. All reactions were carried out under an ambient atmosphere unless otherwise noted. Iodosylbenzene (PhIO, **5**) [3], 4-methoxy-*N*-(phenyl- $\lambda^3$ -iodaneylidene)benzenesulfonamide (**S2h**) [4], pent-4-en-1-ylbenzene (**1h**) [5], and 2-(hex-5-en-1-yl)isoindoline-1,3-dione (**1o**) [6] were synthesized according to literature methods.

**A.2 Characterization details** <sup>1</sup>H, <sup>19</sup>F, and <sup>13</sup>C NMR spectra were recorded on an Ascend™ 400 NMR (Bruker), an Avance III NMR (Bruker), or an Avance Neo 500 NMR (Bruker) and were referenced against residual proteo solvent signals: CDCl<sub>3</sub> (7.26 ppm, <sup>1</sup>H; 77.16 ppm, <sup>13</sup>C), (CD<sub>3</sub>)<sub>2</sub>SO (2.50 ppm, <sup>1</sup>H; 39.52 ppm, <sup>13</sup>C), CD<sub>3</sub>OD (3.31 ppm, <sup>1</sup>H, 49.00 ppm, <sup>13</sup>C), and CD<sub>3</sub>CN (1.94 ppm, <sup>1</sup>H; 1.32 ppm, <sup>13</sup>C) [7]. <sup>1</sup>H NMR data are reported as follows: chemical shift ( $\delta$ , ppm), (multiplicity: s (singlet), d (doublet), t (triplet), m (multiplet), br (broad), integration). <sup>19</sup>F NMR data are reported as follows: chemical shift ( $\delta$ , ppm). <sup>13</sup>C NMR data are reported as follows: chemical shift ( $\delta$ , ppm), d (doublet), t (triplet), q (quartet), m (multiplet). Mass spectrometry data were recorded on either Orbitrap Fusion™ Tribrid™ Mass Spectrometer or Q Exactive™ Focus Hybrid Quadrupole-Orbitrap™ Mass Spectrometer from ThermoFisher Scientific.

**A.3 Electrochemical experiment details.** Cyclic voltammetry (CV) experiments were carried out using CH Instruments Electrochemical Analyzer (Model CHI620A or CHI620E) in an undivided three-electrode cell under an N<sub>2</sub> atmosphere. A glassy carbon working electrode (circular surface,  $d = 3.0$  mm), Pt counter electrode, and Ag reference electrode were used (obtained from CH Instruments). Reference electrode was prepared using 0.10 M solution of [TBA]PF<sub>6</sub> in MeCN with 1.0 mM AgNO<sub>3</sub>, and IR compensation was not applied. The working electrode was polished using 0.5  $\mu$ m alumina in a figure eight motion prior to each measurement, and the distance between the working and counter electrode was 11.0 mm. CV experiments are conducted at 20 °C, and scans start at 0.0 V vs Ag<sup>+</sup>/Ag (−0.133 V vs Fc<sup>+</sup>/Fc) and proceeds cathodically at a scan rate of 0.10 V/s.

## B. Synthesis and characterization

### B.1 Iminoiodinane reagents

#### B.1.1 Synthesis of arylsulfonamide precursors (**S1**)

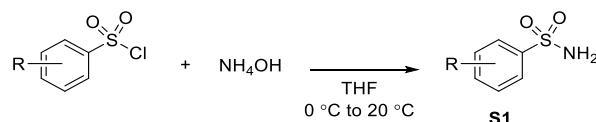

**General Procedure** Arylsulfonamide precursors (**S1**) were prepared according to the following modification of literature methods [8]. A 40 mL vial was charged with a suitable arylsulfonyl chloride (10.0 mmol, 1.00 equiv) and THF (5.0 mL). The vial was cooled to 0 °C using an ice bath and 33% aqueous ammonia (5.0 mL, 90 mmol, 9.0 equiv) was added. The solution was warmed to 20 °C and allowed to stir 16 h. The reaction mixture was then transferred to a separatory funnel and acidified with 4 M HCl until pH < 7. The aqueous solution was then extracted with EtOAc (3 × 30 mL). The combined organic fractions were washed with brine (30 mL), dried over Na<sub>2</sub>SO<sub>4</sub>, and concentrated under reduced pressure. The resulting solid was dried in vacuo and used without further purification.

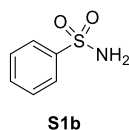

*Benzenesulfonamide (S1b)*. Prepared via general procedure from benzenesulfonyl chloride (1.76 g, 10.0 mmol) and obtained as a white solid (1.38 g, 88%). <sup>1</sup>H NMR (400 MHz, CDCl<sub>3</sub>) δ 7.94 (d, *J* = 7.6 Hz, 2H), 7.60 (t, *J* = 7.2 Hz, 1H), 7.53 (t, *J* = 8.1 Hz, 2H), 4.73 (bs, 2H). The spectral data are well-matched to those reported in the literature [9].

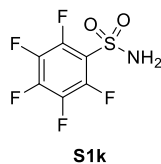

*2,3,4,5,6-Pentafluorobenzenesulfonamide (S1k)*. Prepared via general procedure from 2,3,4,5,6-pentafluorobenzenesulfonyl chloride (1.48 ml, 10.0 mmol) and obtained as an off white solid (1.38 g, 56%). <sup>1</sup>H NMR (400 MHz, CDCl<sub>3</sub>) δ 5.42 (bs, 2H). <sup>19</sup>F NMR (377 MHz, CDCl<sub>3</sub>) δ -137.1 (m), -145.9 (tt, *J* = 20.7, 6.4 Hz), -158.4 (m). The spectral data are well-matched to those reported in the literature [10].

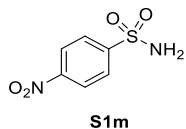

*4-Nitrobenzenesulfonamide (S1m)*. Prepared via general procedure from 4-nitrobenzenesulfonyl chloride (2.22 g, 10.0 mmol) and obtained as a white solid (1.81 g, 90%).  $^1\text{H}$  NMR (400 MHz,  $(\text{CD}_3)_2\text{SO}$ )  $\delta$  8.41 (d,  $J$  = 8.8 Hz, 2H), 8.06 (d,  $J$  = 8.9 Hz, 2), 7.72 (bs, 2H). The spectral data are well-matched to those reported in the literature [9].

### B.1.2 Synthesis of iminoiodinane derivatives (**2**)

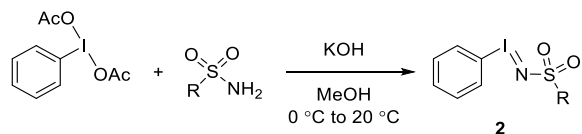

**General Procedure** Iminoiodinane derivatives (**2**) were prepared according to the modification of literature method [11]. A 40 mL vial was charged with an appropriate sulfonamide (2.50 mmol, 1.00 equiv), KOH (351 mg, 6.25 mmol, 2.50 equiv), and MeOH (10 mL). The vial was cooled to 0 °C, and phenyl- $\lambda^3$ -iodanediyl diacetate (807 mg, 2.50 mmol, 1.00 equiv) was added in one portion. The reaction mixture was stirred at 0 °C for 30 min and then was allowed to warm to 23 °C at which temperature it was stirred for 3 h. The mixture was cooled to 0 °C, and ice-cold water (30 mL) was added. The reaction mixture was stirred at 0 °C until precipitation was observed. Solids were collected, washed with water (10 mL), ice-cold  $\text{CHCl}_3$ /Hex (10% v/v, 5 mL), and ether (10 mL), and dried *in vacuo*.

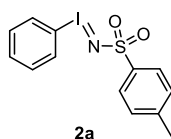

*4-Methyl-N-(phenyl- $\lambda^3$ -iodaneylidene)benzenesulfonamide (PhINTs, 2a)*. Prepared via the general procedure from *p*-toluenesulfonamide (2.57 g, 15.0 mmol), recrystallized from methanol, and obtained as an off white solid (4.03 g, 72%).  $^1\text{H}$  NMR (400 MHz,  $(\text{CD}_3)_2\text{SO}$ )  $\delta$  7.69 (d,  $J$  = 8.4 Hz, 2H), 7.48–7.42 (m, 3H), 7.29 (t,  $J$  = 7.8 Hz, 2H), 7.06 (d,  $J$  = 7.8 Hz, 2H), 2.27 (s, 3H). These spectral data are well-matched to those reported in the literature [12].

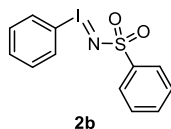

*N-(Phenyl- $\lambda^3$ -iodaneylidene)benzenesulfonamide (2b)*. Prepared via the general procedure from benzenesulfonamide (**S1b**, 505 mg, 3.22 mmol) and obtained as a white solid (696 mg, 61%).  $^1\text{H}$  NMR (400 MHz,  $(\text{CD}_3)_2\text{SO}$ )  $\delta$  7.72 (d,  $J$  = 7.6 Hz, 2H), 7.56 (d,  $J$  = 7.3 Hz, 2H), 7.45 (t,  $J$  = 7.4 Hz, 1H), 7.35 (t,  $J$  = 7.3 Hz, 1H), 7.31–7.27 (m, 4H).  $^{13}\text{C}$  NMR (126 MHz,  $\text{CD}_3\text{OD}$ )  $\delta$  145.1, 133.3, 133.2, 132.2, 132.0, 130.0, 127.1, 122.6. HRMS-ESI<sup>+</sup> ( $m/z$ ):  $[\text{M}+\text{H}]^+$  calcd. for  $\text{C}_{12}\text{H}_{10}\text{INO}_2\text{S}$ , 359.9550; found, 359.9542.

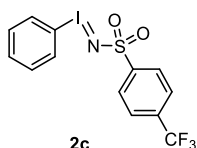

*N*-(Phenyl- $\lambda^3$ -iodaneylidene)-4-(trifluoromethyl)benzenesulfonamide (**2c**). Prepared via general procedure from 4-(trifluoromethyl)benzenesulfonamide (563 mg, 2.50 mmol) and obtained as a white solid (725 mg, 68%).  $^1\text{H}$  NMR (400 MHz,  $(\text{CD}_3)_2\text{SO}$ )  $\delta$  7.68 (t,  $J$  = 7.6 Hz, 4H), 7.56 (d,  $J$  = 8.1 Hz, 2H), 7.40 (t,  $J$  = 7.6 Hz, 1H), 7.24 (t,  $J$  = 7.9 Hz, 2H).  $^{19}\text{F}$  NMR (377 MHz,  $(\text{CD}_3)_2\text{SO}$ )  $\delta$  -61.5.  $^{13}\text{C}$  NMR (126 MHz,  $\text{CD}_3\text{OD}$ )  $\delta$  138.6, 133.3, 132.2, 132.0, 131.4, 128.0, 127.1, 125.0 (q,  $J$  = 272.0 Hz), 122.6. HRMS-ESI<sup>+</sup> ( $m/z$ ):  $[\text{M}+\text{H}]^+$  calcd. for  $\text{C}_{13}\text{H}_9\text{F}_3\text{INO}_2\text{S}$ , 427.9424; found, 427.9417.

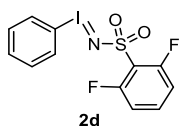

2,6-Difluoro-*N*-(phenyl- $\lambda^3$ -iodaneylidene)benzenesulfonamide (**2d**). Prepared via general procedure from 2,6-difluorobenzenesulfonamide (483 mg, 2.50 mmol) and obtained as a white solid (710 mg, 72%).  $^1\text{H}$  NMR (400 MHz,  $(\text{CD}_3)_2\text{SO}$ )  $\delta$  7.76 (d,  $J$  = 8.4 Hz, 2H), 7.43 (t,  $J$  = 7.3 Hz, 1H), 7.36–7.28 (m, 3H), 6.88 (t,  $J$  = 8.6 Hz, 2H). The spectral data are well-matched to those reported in the literature [11].

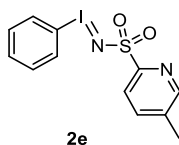

5-Methyl-*N*-(phenyl- $\lambda^3$ -iodaneylidene)pyridine-2-sulfonamide (**2e**). Prepared via general procedure from 5-methylpyridine-2-sulfonamide (430 mg, 2.50 mmol) and obtained as a white solid (910 mg, 97%).  $^1\text{H}$  NMR (400 MHz,  $(\text{CD}_3)_2\text{SO}$ )  $\delta$  8.35 (d,  $J$  = 2.0 Hz, 1H), 7.93 (d,  $J$  = 8.2 Hz, 2H), 7.71 (dd,  $J$  = 8.0, 2.1 Hz, 1H), 7.64 (d,  $J$  = 8.1 Hz, 1H), 7.55 (tt,  $J$  = 7.4, 2.1 Hz, 1H), 7.46 (tt,  $J$  = 7.4, 2.2 Hz, 2H), 2.32 (s, 3H). The spectral data are well-matched to those reported in the literature [13].

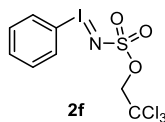

2,2,2-Trichloroethyl (phenyl- $\lambda^3$ -iodaneylidene)sulfamate (PhINTces, **2f**). Prepared via general procedure from 2,2,2-trichloroethyl sulfamate (360 mg, 1.58 mmol) and obtained as a white solid (552 mg, 82%).  $^1\text{H}$  NMR (400 MHz,  $(\text{CD}_3)_2\text{SO}$ )  $\delta$  8.10 (d,  $J$  = 8.4 Hz, 2H), 7.62 (t,  $J$  = 7.6 Hz, 1H), 7.51 (t,  $J$  = 7.8 Hz, 2H), 4.22 (s, 2H). The spectral data are well-matched to those reported in the literature [12].



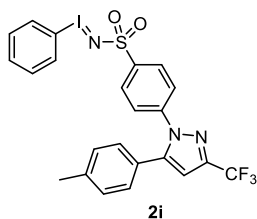

*N*-(Phenyl- $\lambda^3$ -iodaneylidene)-4-(5-(*p*-tolyl)-3-(trifluoromethyl)-1*H*-pyrazol-1-yl)benzenesulfonamide (**2i**). Prepared via general procedure from celecoxib (953 mg, 2.50 mmol) with an additional purification via trituration in diethyl ether (20 mL) and obtained as a white solid with 30% celecoxib impurity (909 mg, 49%).  $^1\text{H}$  NMR (400 MHz,  $\text{CDCl}_3$ )  $\delta$  7.82 (d,  $J$  = 8.5 Hz, 2H), 7.76 (d,  $J$  = 7.9 Hz, 2H), 7.57 (t,  $J$  = 7.5 Hz, 1H), 7.39 (t,  $J$  = 7.9 Hz, 2H), 7.27–7.25 (m, 2H), 7.14 (d,  $J$  = 7.7 Hz, 2H), 7.07 (d,  $J$  = 7.9 Hz, 2H), 6.72 (s, 1H), 2.36 (s, 3H).  $^{19}\text{F}$  NMR (377 MHz,  $\text{CDCl}_3$ )  $\delta$  -60.82.  $^{13}\text{C}$  NMR (126 MHz,  $(\text{CD}_3)_2\text{OD}$ )  $\delta$  147.1, 145.1, 144.8 (q,  $J$  = 38.2 Hz), 143.3, 141.0, 133.3, 132.2, 132.0, 130.6, 130.1, 128.3, 127.2, 127.0, 122.7 (q,  $J$  = 268.0 Hz), 122.6, 106.9, 21.3. HRMS-ESI<sup>+</sup> ( $m/z$ ):  $[\text{M}+\text{H}]^+$  calcd. for  $\text{C}_{23}\text{H}_{17}\text{F}_3\text{IN}_3\text{O}_2\text{S}$ , 584.0111; found, 584.0100.

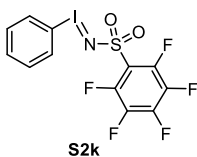

2,3,4,5,6-Pentafluoro-*N*-(phenyl- $\lambda^3$ -iodaneylidene)benzenesulfonamide (**S2k**). Prepared via general procedure from 2,3,4,5,6-pentafluorobenzenesulfonamide (**S1k**, 618 mg, 2.50 mmol) and obtained as a brown solid (619 mg, 55%).  $^1\text{H}$  NMR (400 MHz,  $(\text{CD}_3)_2\text{SO}$ )  $\delta$  7.80 (d,  $J$  = 7.9 Hz, 2H), 7.50 (t,  $J$  = 7.3 Hz, 1H), 7.36 (t,  $J$  = 7.6 Hz, 2H). The spectral data are well-matched to those reported in the literature [4].

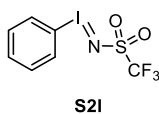

1,1,1-Trifluoro-*N*-(phenyl- $\lambda^3$ -iodaneylidene)methanesulfonamide (PhINTf, **S2l**). Prepared via general procedure from trifluoromethanesulfonamide (373 mg, 2.50 mmol) and obtained as a white solid (273 mg, 31%).  $^1\text{H}$  NMR (400 MHz,  $\text{CD}_3\text{CN}$ )  $\delta$  8.10 (d,  $J$  = 8.0 Hz, 2H), 7.70 (t,  $J$  = 7.5 Hz, 1H), 7.56 (t,  $J$  = 8.2 Hz, 2H). The spectral data are well-matched to those reported in the literature [14].

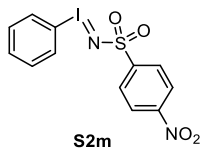

*4-Nitro-N-(phenyl- $\lambda^3$ -iodaneylidene)benzenesulfonamide* (*PhINNs*, **S2m**). Prepared via general procedure from 4-nitrobenzenesulfonamide (**S1m**, 505 mg, 2.50 mmol) and obtained as a white solid (711 mg, 70%).  $^1\text{H}$  NMR (400 MHz,  $(\text{CD}_3)_2\text{SO}$ )  $\delta$  8.03 (d,  $J$  = 8.7 Hz, 2), 7.72 (t,  $J$  = 8.9 Hz, 4H), 7.41 (t,  $J$  = 7.3 Hz, 1H), 7.25 (t,  $J$  = 7.8 Hz, 2H). The spectral data are well-matched to those reported in the literature [12].

## B.2 Aliphatic olefins

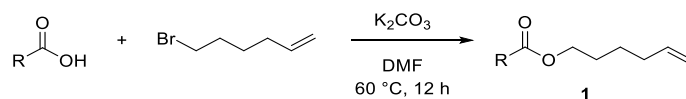

**General Procedure** A 20 mL scintillation vial was charged with the appropriate carboxylic acid (3.00 mmol, 1.00 equiv),  $\text{K}_2\text{CO}_3$  (622 mg, 4.50 mmol, 1.50 equiv), and DMF (20.0 mL). To this vial, 6-bromohex-1-ene (440  $\mu\text{L}$ , 3.30 mmol, 1.10 equiv) was added and the reaction mixture was stirred for 12 h at 60 °C. The solution was then cooled to 23 °C and water (15 mL) was added. The mixture transferred to a separatory funnel and extracted using EtOAc ( $3 \times 10$  mL). The combined organic fractions were washed with  $\text{H}_2\text{O}$  ( $4 \times 10$  mL), brine (30 mL), dried over  $\text{Na}_2\text{SO}_4$ , and concentrated in vacuo. The residue was purified by silica gel flash chromatography to give the corresponding olefin product (**1**).

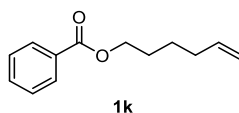

*Hex-5-en-1-yl benzoate (1k)*. Prepared via general procedure from benzoic acid (366 mg, 3.00 mmol), and obtained as a colorless oil (398 mg, 65%).  $^1\text{H}$  NMR (400 MHz,  $\text{CDCl}_3$ )  $\delta$  8.05 (d,  $J$  = 8.3 Hz, 2H), 7.55 (t,  $J$  = 7.4 Hz, 1H), 7.44 (t,  $J$  = 7.7 Hz, 2H), 5.82 (ddt,  $J$  = 16.9, 10.1, 6.7 Hz, 1H), 5.09–4.92 (m, 2H), 4.33 (t,  $J$  = 6.6 Hz, 2H), 2.14 (q,  $J$  = 7.2 Hz, 2H), 1.82–1.75 (m, 2H), 1.59–1.53 (m, 2H). These spectral data are well-matched to those reported in the literature [15].

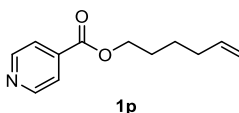

*Hex-5-en-1-yl isonicotinate (1p)*. Prepared via general procedure from isonicotinic acid (369 mg, 3.00 mmol) and obtained as a light brown oil (326 mg, 53%).  $^1\text{H}$  NMR (400 MHz,  $\text{CDCl}_3$ )  $\delta$  8.77 (d,  $J$  = 5.9 Hz, 2H), 7.84 (d,  $J$  = 5.9 Hz, 2H), 5.80 (ddt,  $J$  = 16.9, 10.2, 6.7 Hz, 1H), 5.08–4.94 (m, 2H), 4.36 (t,  $J$  = 6.6 Hz, 2H), 2.13 (q,  $J$  = 7.1 Hz, 2H), 1.79 (dt,  $J$  = 15.1, 6.7 Hz, 2H), 1.54 (tt,  $J$  = 10.0, 6.4 Hz, 2H). These spectral data are well-matched to those reported in the literature [16].

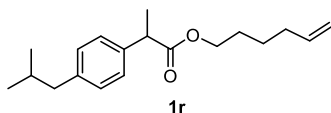

*Hex-5-en-1-yl 2-(4-isobutylphenyl)propanoate (1r)*. Prepared via the general procedure from ibuprofen (618 mg, 3.00 mmol) and obtained as a yellow oil (253 mg, 44%).  $^1\text{H}$  NMR (400 MHz,  $\text{CDCl}_3$ )  $\delta$  7.22 (d,  $J$  = 8.0 Hz, 2H), 7.11 (d,  $J$  = 8.0 Hz, 2H), 5.75 (ddt,  $J$  = 17.1, 10.3, 6.7 Hz, 1H), 5.09–4.92 (m, 2H), 4.12 (t,  $J$  = 6.7 Hz, 2H), 3.72–3.65 (m, 1H), 2.47 (d,  $J$  = 7.1 Hz, 2H), 2.07–1.99 (m, 2H), 1.87 (dd,  $J$  = 12.5, 5.6 Hz, 1H), 1.66–1.54 (m, 2H), 1.50 (d,  $J$  = 7.3 Hz, 3H), 1.36 (d,  $J$  = 9.7, 6.5 Hz, 2H), 0.90 (d,  $J$  = 6.7 Hz, 6H). These spectral data are well-matched to those reported in the literature [17].

### B.3 Aziridination of aliphatic olefins using PhINTs

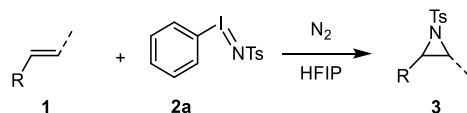

**General Procedure** A 20 mL scintillation vial was charged with the appropriate olefin (**1**, 0.200 mmol, 1.00 equiv) and dry HFIP (1.0 mL) under N<sub>2</sub> atmosphere. To this vial was added PhINTs (**2a**, 149 mg, 0.400 mmol, 2.00 equiv) as a single portion. The reaction was then stirred at 20 °C for 16 h (Procedure A), 50 °C for 16 h (Procedure B), or 50 °C for 48 h (Procedure C). The reaction was then concentrated in vacuo, and the residue was purified by silica gel flash chromatography using EtOAc:hexanes as eluent to afford the corresponding aziridine product (**3**).

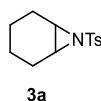

**7-Tosyl-7-azabicyclo[4.1.0]heptane (3a).** Prepared via Procedure A from cyclohexene (**1a**, 20.2  $\mu$ L, 0.200 mmol) and obtained as a white solid (23.1 mg, 46%). <sup>1</sup>H NMR (400 MHz, CDCl<sub>3</sub>)  $\delta$  7.81 (d,  $J$  = 8.3 Hz, 2H), 7.31 (d,  $J$  = 8.3 Hz, 2H), 3.02–2.96 (m, 2H), 2.43 (s, 3H), 1.84–1.73 (m, 4H), 1.46–1.35 (m, 2H), 1.28–1.17 (m, 2H). These spectral data are well-matched to those reported in the literature [18].

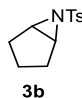

**6-Tosyl-6-azabicyclo[3.1.0]hexane (3b).** Prepared via Procedure A from cyclopentene (**1b**, 17.8  $\mu$ L, 0.200 mmol) and obtained as a white solid (38.0 mg, 80%). <sup>1</sup>H NMR (400 MHz, CDCl<sub>3</sub>)  $\delta$  7.82 (d,  $J$  = 8.3 Hz, 2H), 7.32 (d,  $J$  = 8.0 Hz, 2H), 3.33 (d,  $J$  = 1.6 Hz, 2H), 2.46–2.41 (s, 3H), 1.99–1.87 (m, 2H), 1.68–1.51 (m, 3H), 1.49–1.32 (m, 1H). These spectral data are well-matched to those reported in the literature [19].

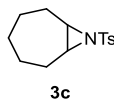

**8-Tosyl-8-azabicyclo[5.1.0]octane (3c).** Prepared via Procedure A from cycloheptene (**1c**, 23.3  $\mu$ L, 0.200 mmol) and obtained as a white solid (19.1 mg, 36%). <sup>1</sup>H NMR (400 MHz, CDCl<sub>3</sub>)  $\delta$  7.81 (d,  $J$  = 8.4 Hz, 2H), 7.32 (d,  $J$  = 8.3 Hz, 2H), 2.98–2.91 (m, 2H), 2.43 (s, 3H), 1.89–1.74 (m, 3H), 1.61–1.40 (m, 5H), 1.22–1.10 (m, 1H). These spectral data are well-matched to those reported in the literature [18].

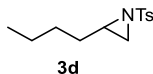

**2-Butyl-1-tosylaziridine (3d).** Prepared via Procedure B from 1-hexene (**1d**, 25.0  $\mu$ L, 0.200 mmol) and obtained as a yellow oil (37.7 mg, 79%).  $^1\text{H}$  NMR (400 MHz,  $\text{CDCl}_3$ )  $\delta$  7.82 (d,  $J$  = 8.3 Hz, 2H), 7.33 (d,  $J$  = 8.1 Hz, 2H), 2.71 (tt,  $J$  = 7.3, 4.8 Hz, 1H), 2.62 (d,  $J$  = 7.0 Hz, 1H), 2.44 (s, 3H), 2.05 (d,  $J$  = 4.5 Hz, 1H), 1.58–1.50 (m, 1H), 1.38–1.29 (m, 1H), 1.28–1.16 (m, 4H), 0.81 (t,  $J$  = 6.9 Hz, 3H). These spectral data are well-matched to those reported in the literature [20].

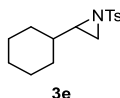

**2-Cyclohexyl-1-tosylaziridine (3e).** Prepared via Procedure B from vinylcyclohexane (**1e**, 27.3  $\mu$ L, 0.200 mmol) and obtained as a yellow oil (37.3 mg, 67%).  $^1\text{H}$  NMR (400 MHz,  $\text{CDCl}_3$ )  $\delta$  7.82 (d,  $J$  = 8.4 Hz, 2H), 7.33 (d,  $J$  = 8.1 Hz, 2H), 2.59 (d,  $J$  = 7.0 Hz, 1H), 2.53 (td,  $J$  = 7.1, 4.6 Hz, 1H), 2.44 (s, 3H), 2.09 (d,  $J$  = 4.6 Hz, 1H), 1.74–1.54 (m, 4H), 1.54–1.45 (m, 1H), 1.22–0.83 (m, 6H). These spectral data are well-matched to those reported in the literature [21].

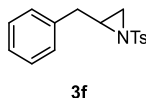

**2-Benzyl-1-tosylaziridine (3f).** Prepared via Procedure C from allylbenzene (**1f**, 26.4  $\mu$ L, 0.200 mmol) and obtained as a white solid (30.6 mg, 53%).  $^1\text{H}$  NMR (400 MHz,  $\text{CDCl}_3$ )  $\delta$  7.69 (d,  $J$  = 8.2 Hz, 2H), 7.21 (d,  $J$  = 8.2 Hz, 2H), 7.18–7.13 (m, 3H), 7.06–7.02 (m, 2H), 2.98–2.92 (m, 1H), 2.84–2.79 (dd,  $J$  = 14.5, 5.2 Hz, 1H), 2.71–2.65 (m, 2H), 2.42 (s, 3H), 2.16 (d,  $J$  = 4.5 Hz, 1H). These spectral data are well-matched to those reported in the literature [20].

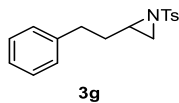

**2-Phenethyl-1-tosylaziridine (3g).** Prepared via Procedure B from but-3-en-1-ylbenzene (**1g**, 30.0  $\mu$ L, 0.200 mmol) and obtained as a colorless oil (32.5 mg, 54%).  $^1\text{H}$  NMR (400 MHz,  $\text{CDCl}_3$ )  $\delta$  7.83 (d,  $J$  = 8.4 Hz, 2H), 7.34 (d,  $J$  = 8.0 Hz, 2H), 7.30–7.23 (m, 2H), 7.21–7.16 (m, 1H), 7.15–7.08 (m, 2H), 2.77 (tt,  $J$  = 7.6, 4.8 Hz, 1H), 2.66–2.53 (m, 3H), 2.45 (s, 3H), 2.05 (d,  $J$  = 4.6 Hz, 1H), 1.88 (dddd,  $J$  = 14.3, 9.3, 7.5, 5.0 Hz, 1H), 1.74–1.62 (m, 1H). These spectral data are well-matched to those reported in the literature [22].

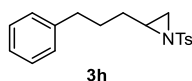

**2-(3-Phenylpropyl)-1-tosylaziridine (3h).** Prepared via Procedure B from pent-4-en-1-ylbenzene (**1h**, 29.2 mg, 0.200 mmol) and obtained as a colorless oil (16.4 mg, 26%). <sup>1</sup>H NMR (400 MHz, CDCl<sub>3</sub>) δ 7.82 (d, *J* = 8.2 Hz, 2H), 7.31 (d, *J* = 8.0 Hz, 2H), 7.29–7.22 (m, 3H), 7.19–7.14 (m, 1H), 7.07 (d, *J* = 7.4 Hz, 2H), 2.74 (ddd, *J* = 9.0, 7.4, 4.5 Hz, 1H), 2.64 (d, *J* = 7.0 Hz, 1H), 2.74 (ddd, *J* = 9.0, 7.4, 4.5 Hz, 1H), 2.64 (d, *J* = 7.0 Hz, 1H), 2.55 (t, *J* = 7.5 Hz, 2H), 2.41 (s, 3H), 2.05 (d, *J* = 4.6 Hz, 1H), 1.67–1.51 (m, 3H), 1.39–1.29 (m, 1H). These spectral data are well-matched to those reported in the literature [23].

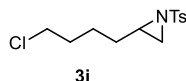

**2-(4-Chlorobutyl)-1-tosylaziridine (3i).** Prepared via Procedure B from 6-chlorohex-1-ene (**1i**, 26.2 μL, 0.200 mmol) and obtained as a colorless oil (36.8 mg, 64%). <sup>1</sup>H NMR (400 MHz, CDCl<sub>3</sub>) δ 7.82 (d, *J* = 8.4 Hz, 2H), 7.34 (d, *J* = 8.0 Hz, 2H), 3.42 (td, *J* = 6.6, 1.0 Hz, 2H), 2.71 (tt, *J* = 7.0, 4.5 Hz, 1H), 2.64 (d, *J* = 7.0 Hz, 1H), 2.44 (s, 3H), 2.07 (d, *J* = 4.5 Hz, 1H), 1.75–1.57 (m, 3H), 1.44–1.23 (m, 3H). These spectral data are well-matched to those reported in the literature [22].

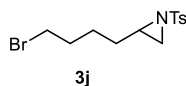

**2-(4-Bromobutyl)-1-tosylaziridine (3j).** Prepared via Procedure C from 6-bromohex-1-ene (**1j**, 26.7 μL, 0.200 mmol) and obtained as a colorless oil (31.5 mg, 48%). <sup>1</sup>H NMR (400 MHz, CDCl<sub>3</sub>) δ 7.83 (d, *J* = 8.0 Hz, 2H), 7.35 (d, *J* = 8.2 Hz, 2H), 3.29 (td, *J* = 6.7, 1.5 Hz, 2H), 2.71 (tt, *J* = 7.2, 4.5 Hz, 1H), 2.64 (d, *J* = 7.0 Hz, 1H), 2.45 (s, 3H), 2.07 (d, *J* = 4.5 Hz, 1H), 1.84–1.73 (m, 2H), 1.68–1.57 (m, 1H), 1.43–1.29 (m, 3H). These spectral data are well-matched to those reported in the literature [24].

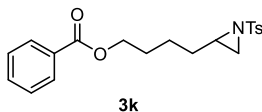

**4-(1-Tosylaziridin-2-yl)butyl benzoate (3k).** Prepared via Procedure C from hex-5-en-1-yl benzoate (**1k**, 40.9 mg, 0.200 mmol) and obtained as a yellow oil (30.7 mg, 41%). <sup>1</sup>H NMR (400 MHz, CDCl<sub>3</sub>) δ 8.02 (d, *J* = 7.3 Hz, 2H), 7.82 (d, *J* = 8.0 Hz, 2H), 7.57 (t, *J* = 7.5 Hz, 1H), 7.45 (t, *J* = 7.6 Hz, 2H), 7.30 (d, *J* = 8.0 Hz, 2H), 4.21 (t, *J* = 6.5 Hz, 2H), 2.77–2.72 (m, 1H), 2.65 (d, *J* = 7.0 Hz, 1H), 2.40 (s, 3H), 2.08 (d, *J* = 4.5 Hz, 1H), 1.81–1.63 (m, 3H), 1.44–1.33 (m, 3H). These spectral data are well-matched to those reported in the literature [25].

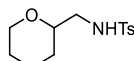

S3I

**4-Methyl-N-((tetrahydro-2H-pyran-2-yl)methyl)benzenesulfonamide (S3I).** Prepared via Procedure B from hex-5-en-1-ol (**11**, 24.0  $\mu$ L, 0.200 mmol) and obtained as a white solid (16.7 mg, 31%) (the uncyclized product 4-(1-tosylaziridin-2-yl)butan-1-ol (**3I**) was obtained in 50% NMR yield from the crude mixture).  $^1\text{H}$  NMR (400 MHz,  $\text{CDCl}_3$ )  $\delta$  7.73 (d,  $J$  = 8.3 Hz, 2H), 7.30 (d,  $J$  = 7.9 Hz, 2H), 4.83 (dd,  $J$  = 8.5, 3.6 Hz, 1H), 3.93–3.86 (m, 1H), 3.38–3.28 (m, 2H), 3.07 (ddd,  $J$  = 12.0, 8.4, 3.2 Hz, 1H), 2.77 (ddd,  $J$  = 12.1, 8.3, 3.6 Hz, 1H), 2.42 (s, 3H), 1.84–1.76 (m, 1H), 1.52–1.43 (m, 4H), 1.30–1.21 (m, 1H). These spectral data are well-matched to those reported in the literature [26].

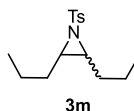

3m

**2,3-Dipropyl-1-tosylaziridine (3m).** Prepared via Procedure B from *cis*-oct-4-ene ((*Z*)-**1m**, 31.3  $\mu$ L, 0.200 mmol), and obtained as a colorless oil (40.4 mg, 72%, 1.3 : 1.0 *trans:cis* mixture), or prepared via Procedure B from *trans*-oct-4-ene ((*E*)-**1m**, 31.3  $\mu$ L, 0.200 mmol) and obtained as a colorless oil (36.0 mg, 64%, 1.3 : 1.0 *trans:cis* mixture). From (*Z*)-**1m**:  $^1\text{H}$  NMR (400 MHz,  $\text{CDCl}_3$ )  $\delta$  7.86–7.78 (m, 3.56H, major + minor), 7.33–7.27 (m, 3.71H, major + minor), 2.78 (ddt,  $J$  = 8.8, 7.3, 3.6 Hz, 1.42H, minor), 2.68–2.59 (m, 2H, major), 2.45–2.37 (m, 5.23H, major + minor), 1.83–1.57 (m, 3.77H, major+ minor), 1.52–1.22 (m, 8.58H, major+ minor), 0.94–0.83 (m, 10H, major+ minor). From (*E*)-**1m**:  $^1\text{H}$  NMR (400 MHz,  $\text{CDCl}_3$ )  $\delta$  7.86–7.78 (m, 3.73H, major + minor), 7.34–7.26 (m, 3.76H, major + minor), 2.78 (ddt,  $J$  = 8.8, 7.3, 3.6 Hz, 1.45H, minor), 2.67–2.60 (m, 2H, major), 2.46–2.39 (m, 5.44H, major + minor), 1.83–1.58 (m, 3.45H, major+ minor), 1.51–1.22 (m, 7.84H, major+ minor), 0.94–0.84 (m, 10.81H, major+ minor). These spectral data are well-matched to those reported in the literature [27].

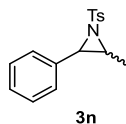

3n

**2-Methyl-3-phenyl-1-tosylaziridine (3n).** Prepared via Procedure A from *cis*- $\beta$ -methylstyrene ((*Z*)-**1n**, 26.0  $\mu$ L, 0.200 mmol), and obtained as a white solid (21.8 mg, 38%, 1.0 : 2.0 *trans:cis* mixture) or prepared via Procedure A from *trans*- $\beta$ -methylstyrene ((*E*)-**1n**, 26.0  $\mu$ L, 0.200 mmol) and obtained as a white solid (20.1 mg, 35%, 1.7 : 1.0 *trans:cis* mixture). From (*Z*)-**1n**  $^1\text{H}$  NMR (400 MHz,  $\text{CDCl}_3$ )  $\delta$  7.90 (d,  $J$  = 8.4 Hz, 2H, major), 7.83 (d,  $J$  = 8.4 Hz, 1H, minor), 7.36–7.30 (m, 3.16H, major + minor), 7.29–7.23 (m, 6H, major + minor), 7.22–7.17 (m, 3.14H, major + minor), 7.16–7.11 (m, 2H, major + minor), 3.92 (d,  $J$  = 7.4 Hz, 1H, major), 3.79 (d,  $J$  = 4.4 Hz, 0.44H, minor), 3.19 (m, 1H, major), 2.91 (m, 0.45H, minor), 2.44 (s, 3H, major), 2.39 (s, 1.02H, minor), 1.85 (d,  $J$  = 6.0 Hz, 1.22H, minor), 1.04 (d,  $J$  = 5.8 Hz, 3H, major). From (*E*)-**1n**  $^1\text{H}$  NMR (400 MHz,  $\text{CDCl}_3$ )  $\delta$  7.89 (d,  $J$  = 8.3 Hz, 1.12H, minor), 7.82 (d,  $J$  = 8.3 Hz, 2H, major), 7.36–7.30 (m, 2.24H, major + minor), 7.30–7.24 (m, 6H, major + minor), 7.21–7.19



(m, 1.38H, major + minor), 7.15–7.13 (m, 2H, major + minor), 3.93 (d,  $J = 7.3$  Hz, 0.56H, minor), 3.79 (d,  $J = 4.3$  Hz, 1H, major), 3.19 (dq,  $J = 7.1, 5.8$  Hz, 0.51H, minor), 2.91 (qd,  $J = 6.0, 4.4$  Hz, 1H, major), 2.44 (s, 1.92H, minor), 2.39 (s, 3H, major), 1.84 (d,  $J = 6.0$  Hz, 3H, major), 1.02 (d,  $J = 5.8$  Hz, 1.48H, minor). These spectral data are well-matched to those reported in the literature [28].

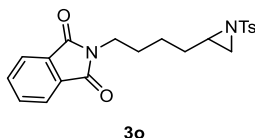

*2-(4-(1-Tosylaziridin-2-yl)butyl)isoindoline-1,3-dione (3o)*. Prepared via Procedure B from 2-(hex-5-en-1-yl)isoindoline-1,3-dione (**1o**, 45.9 mg, 0.200 mmol) and obtained as a white solid (25.7 mg, 32%).  $^1\text{H}$  NMR (400 MHz,  $\text{CDCl}_3$ )  $\delta$  7.90–7.77 (m, 4H), 7.77–7.65 (m, 2H), 7.34 (d,  $J = 8.0$  Hz, 2H), 3.59 (t,  $J = 7.3$  Hz, 2H), 2.71 (tt,  $J = 7.2, 4.8$  Hz, 1H), 2.63 (d,  $J = 7.0$  Hz, 1H), 2.44 (s, 3H), 2.07 (d,  $J = 4.5$  Hz, 1H), 1.74–1.58 (m, 2H), 1.47–1.14 (m, 4H). These spectral data are well-matched to those reported in the literature [23].

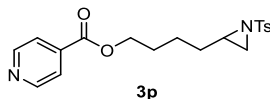

*4-(1-Tosylaziridin-2-yl)butyl isonicotinate (3p)*. Prepared via Procedure C from hex-5-en-1-yl isonicotinate (**1p**, 41.1 mg, 0.200 mmol) and obtained as a brown oil (17.6 mg, 26%).  $^1\text{H}$  NMR (400 MHz,  $\text{CDCl}_3$ )  $\delta$  8.78 (dd,  $J = 4.5, 1.5$  Hz, 2H), 7.84–7.81 (m, 4H), 7.32 (d,  $J = 8.2$  Hz, 2H), 4.27 (t,  $J = 6.5$  Hz, 2H), 2.80–2.76 (m, 1H), 2.63 (d,  $J = 7.2$  Hz, 1H), 2.43 (s, 3H), 2.07 (d,  $J = 4.6$  Hz, 1H), 1.79–1.67 (m, 3H), 1.49–1.43 (m, 2H), 1.41–1.35 (m, 1H).  $^{13}\text{C}$  NMR (126 MHz,  $\text{CDCl}_3$ )  $\delta$  165.3, 150.8, 144.7, 137.6, 135.3, 129.8, 128.2, 123.0, 65.5, 39.9, 34.1, 31.0, 28.1, 23.6, 21.8. HRMS-ESI $^+$  ( $m/z$ ):  $[\text{M}+\text{H}]^+$  calcd. for  $\text{C}_{19}\text{H}_{23}\text{N}_2\text{O}_4\text{S}$ , 375.1373; found, 375.1362.

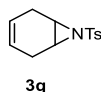

*7-Tosyl-7-azabicyclo[4.1.0]hept-3-ene (3q)*. Prepared via Procedure A from cyclohexa-1,4-diene (**1q**, 18.9  $\mu\text{L}$ , 0.200 mmol) using 1.2 equivalents of PhINTs (**2a**) and obtained as an off-white solid (10.5 mg, 21%).  $^1\text{H}$  NMR (400 MHz,  $\text{CDCl}_3$ ) 7.83 (d,  $J = 8.0$  Hz, 2H), 7.32 (d,  $J = 8.0$  Hz, 2H), 7.26 (s, 1H), 5.44 (s, 2H), 3.11 (s, 2H), 2.44 (s, 3H), 2.37 (s, 4H). These spectral data are well-matched to those reported in the literature [29].

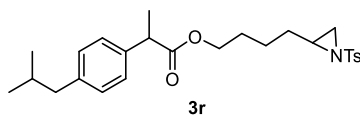

*4-(1-Tosylaziridin-2-yl)butyl 2-(4-isobutylphenyl)propanoate (3r)*. Prepared via general procedure from hex-5-en-1-yl 2-(4-isobutylphenyl)propanoate (**1r**, 57.7 mg, 0.200 mmol) using 4.00 equiv of PhINTs (**2a**) at 20 °C for 48 h and obtained as a light yellow solid (28.1 mg, 31%). <sup>1</sup>H NMR (400 MHz, CDCl<sub>3</sub>) δ 7.80 (d, *J* = 8.0 Hz, 2H), 7.30 (dd, *J* = 7.7, 5.3 Hz, 2H), 7.18 (d, *J* = 8.0 Hz, 2H), 7.08 (d, *J* = 8.0 Hz, 2H), 3.99–3.00 (m, 2H), 3.66 (qd, *J* = 7.2, 2.0 Hz, 1H), 2.69–2.64 (m, 1H), 2.60 (dd, *J* = 7.0, 2.8 Hz, 1H), 2.45–2.43 (m, 5H), 2.00 (t, *J* = 4.1 Hz, 1H), 1.89–1.79 (m, 1H), 1.55–1.47 (m, 6H), 1.32–1.18 (m, 3H), 0.89 (d, *J* = 6.8 Hz, 6H). <sup>13</sup>C NMR (126 MHz, CDCl<sub>3</sub>) δ 174.8, 144.7, 140.7, 138.0, 135.4, 129.8, 129.4, 128.1, 127.3, 64.3, 45.3, 45.2, 40.1, 33.8, 33.8, 30.9, 30.3, 28.0, 23.3, 22.5, 21.7, 18.6. HRMS-ESI<sup>+</sup> (*m/z*): [M+H]<sup>+</sup> calcd. for C<sub>26</sub>H<sub>36</sub>NO<sub>4</sub>S, 458.2360; found, 458.2338.

## B.4 Aziridination of cyclopentene using iminoiodinane derivatives

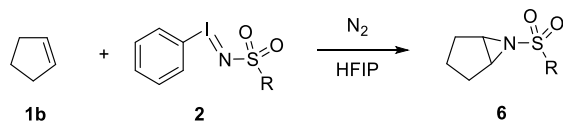

### General Procedure

A 20-mL scintillation vial was charged with cyclopentene (**1b**, 17.6  $\mu$ L, 0.200 mmol, 1.00 equiv) and dry HFIP (1.0 mL) under  $N_2$  atmosphere. To this vial was added the appropriate iminoiodinane (**2**, 0.400 mmol, 2.00 equiv) in a single portion. The reaction was then stirred for 16 h at 20  $^{\circ}$ C (Procedure D) or 40  $^{\circ}$ C (Procedure E). The mixture was then concentrated in vacuo, and the residue was purified by silica gel flash chromatography using EtOAc:Hexanes as eluent to afford the corresponding aziridine (**6**).

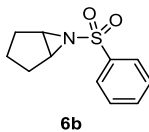

**6-(Phenylsulfonyl)-6-azabicyclo[3.1.0]hexane (6b)**. Prepared via Procedure D from *N*-(phenyl- $\lambda^3$ -iodaneylidene)benzenesulfonamide (**2b**, 144 mg, 0.400 mmol) and obtained as a colorless oil (20.2 mg, 45%).  $^1H$  NMR (400 MHz,  $CDCl_3$ )  $\delta$  7.93 (d,  $J$  = 7.3 Hz, 2H), 7.65–7.58 (m, 1H), 7.53 (dd,  $J$  = 8.5, 7.1 Hz, 2H), 3.36 (d, 2H), 1.99–1.89 (m, 2H), 1.68–1.53 (m, 3H), 1.46–1.33 (m, 1H). These spectral data are well-matched to those reported in the literature [30].

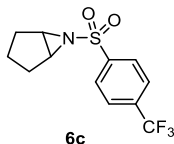

**6-((4-(Trifluoromethyl)phenyl)sulfonyl)-6-azabicyclo[3.1.0]hexane (6c)**. Prepared via Procedure D from *N*-(phenyl- $\lambda^3$ -iodaneylidene)-4-(trifluoromethyl)benzenesulfonamide (**2c**, 171 mg, 0.400 mmol) and obtained as a colorless oil (27.1 mg, 47%).  $^1H$  NMR (400 MHz,  $CDCl_3$ )  $\delta$  8.07 (d,  $J$  = 8.2 Hz, 2H), 7.80 (d,  $J$  = 8.2 Hz, 2H), 3.43 (s, 2H), 1.96 (dd,  $J$  = 13.9, 8.1 Hz, 2H), 1.70–1.59 (m, 3H), 1.43–1.34 (m, 1H).  $^{19}F$  NMR (377 MHz,  $CDCl_3$ )  $\delta$  -63.2.  $^{13}C$  NMR (126 MHz,  $CDCl_3$ )  $\delta$  142.9, 135.0 ( $J$  = 33.1 Hz), 128.2, 126.3 ( $J$  = 3.5 Hz), 123.4 ( $J$  = 272.9 Hz), 47.6, 27.1, 19.5. HRMS-ESI<sup>+</sup> ( $m/z$ ):  $[M+H]^+$  calcd. for  $C_{12}H_{13}F_3NO_2S$ , 292.0614; found, 292.0606.

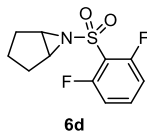

6-((2,6-Difluorophenyl)sulfonyl)-6-azabicyclo[3.1.0]hexane (**6d**). Prepared via Procedure D from 2,6-difluoro-*N*-(phenyl- $\lambda^3$ -iodaneylidene)benzenesulfonamide (**2d**, 158 mg, 0.400 mmol) and obtained as a colorless oil (26.9 mg, 52%).  $^1\text{H}$  NMR (400 MHz,  $\text{CDCl}_3$ )  $\delta$  7.54 (tt,  $J$  = 8.5, 5.9 Hz, 1H), 7.03 (t,  $J$  = 8.7 Hz, 2H), 3.59 (s, 2H), 2.04 (dd,  $J$  = 13.9, 7.9 Hz, 2H), 1.72–1.59 (m, 3H), 1.45–1.35 (m, 1H).  $^{19}\text{F}$  NMR (377 MHz,  $\text{CDCl}_3$ )  $\delta$  -105.5 (dd,  $J$  = 9.0, 6.2 Hz).  $^{13}\text{C}$  NMR (126 MHz,  $\text{CDCl}_3$ )  $\delta$  159.9 (dd,  $J$  = 260.7, 3.8 Hz), 135.1 (t,  $J$  = 10.9 Hz), 117.6 (t,  $J$  = 15.8 Hz), 113.3 (dd,  $J$  = 23.4, 3.7 Hz), 48.1, 27.3, 19.4. HRMS-ESI<sup>+</sup> ( $m/z$ ):  $[\text{M}+\text{H}]^+$  calcd. for  $\text{C}_{11}\text{H}_{12}\text{F}_2\text{NO}_2\text{S}$ , 260.0551; found, 260.0544.

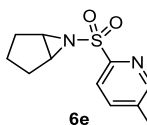

6-((5-Methylpyridin-2-yl)sulfonyl)-6-azabicyclo[3.1.0]hexane (**6e**). Prepared via Procedure E from 5-methyl-*N*-(phenyl- $\lambda^3$ -iodaneylidene)pyridine-2-sulfonamide (**2e**, 150 mg, 0.400 mmol) and obtained as a white solid (21.9 mg, 46%).  $^1\text{H}$  NMR (400 MHz,  $\text{CDCl}_3$ )  $\delta$  8.55 (s, 1H), 7.95 (d,  $J$  = 8.1 Hz, 1H), 7.70 (d,  $J$  = 8.2 Hz, 1H), 3.55 (s, 2H), 2.44 (s, 3H), 1.98 (dd,  $J$  = 13.8, 7.9 Hz, 2H), 1.69–1.65 (m, 2H), 1.60–1.54 (m, 1H), 1.44–1.33 (m, 1H).  $^{13}\text{C}$  NMR (126 MHz,  $\text{CDCl}_3$ )  $\delta$  154.1, 150.8, 138.1, 137.9, 122.5, 47.4, 27.1, 19.5, 18.7. HRMS-ESI<sup>+</sup> ( $m/z$ ):  $[\text{M}+\text{H}]^+$  calcd. for  $\text{C}_{11}\text{H}_{15}\text{N}_2\text{O}_2\text{S}$ , 239.0849; found, 239.0844.

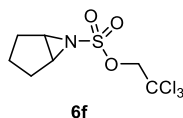

2,2,2-Trichloroethyl 6-azabicyclo[3.1.0]hexane-6-sulfonate (**6f**). Prepared via Procedure E from 2,2,2-trichloroethyl (phenyl- $\lambda^3$ -iodaneylidene)sulfamate (**2f**, 172 mg, 0.400 mmol) and obtained as a white solid (23.0 mg, 39%).  $^1\text{H}$  NMR (400 MHz,  $\text{CDCl}_3$ )  $\delta$  4.78 (s, 2H), 3.46 (s, 2H), 2.10 (dd,  $J$  = 13.3, 8.0 Hz, 2H), 1.78–1.60 (m, 3H), 1.50–1.35 (m, 1H). These spectral data are well-matched to those reported in the literature [31].

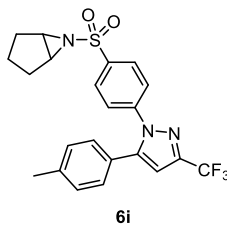

6-((4-(5-(*p*-Tolyl)-3-(trifluoromethyl)-1H-pyrazol-1-yl)phenyl)sulfonyl)-6-azabicyclo[3.1.0]hexane (**6i**). Prepared via Procedure E from *N*-(phenyl- $\lambda^3$ -iodaneylidene)-

4-(5-(*p*-Tolyl)-3-(trifluoromethyl)-1*H*-pyrazol-1-yl)benzenesulfonamide (**2i**, 70 mol% pure as a mixture with celecoxib, 299 mg, 0.400 mmol) and obtained as a white solid (41.1 mg, 46%). <sup>1</sup>H NMR (400 MHz, CDCl<sub>3</sub>) δ 7.92 (d, *J* = 8.7 Hz, 2H), 7.49 (d, *J* = 8.7 Hz, 2H), 7.18 (d, *J* = 8.0 Hz, 2H), 7.11 (d, *J* = 8.1 Hz, 2H), 6.75 (s, 1H), 3.37 (s, 2H), 2.38 (s, 3H), 1.94 (dd, *J* = 13.7, 8.0 Hz, 2H), 1.68–1.57 (m, 3H), 1.42–1.32 (m, 1H). <sup>19</sup>F NMR (377 MHz, CDCl<sub>3</sub>) δ –62.5. <sup>13</sup>C NMR (126 MHz, CDCl<sub>3</sub>) δ 145.5, 144.4 (q, *J* = 38.7 Hz), 143.1, 140.0, 138.8, 129.9, 128.9, 128.8, 125.8, 125.6, 121.2 (q, *J* = 269.3 Hz), 106.5, 47.4, 27.1, 21.5, 19.6. HRMS-ESI<sup>+</sup> (*m/z*): [M+H]<sup>+</sup> calcd. for C<sub>22</sub>H<sub>21</sub>F<sub>3</sub>N<sub>3</sub>O<sub>2</sub>S, 448.1301; found, 448.1290.

## B.5 Aziridination of Cyclopentene using *in situ* Iminoiodinane derivatives

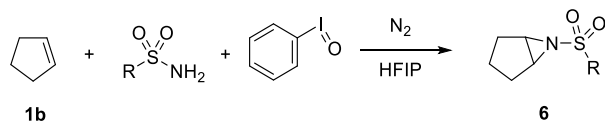

### General Procedure

A 20-mL scintillation vial was charged with cyclopentene (**1b**, 17.6  $\mu\text{L}$ , 0.200 mmol, 1.00 equiv), the appropriate sulfonamide (0.200 mmol, 1.00 equiv), and dry HFIP (1.0 mL) under  $\text{N}_2$  atmosphere. To this vial was added iodosylbenzene (PhIO, 88.0 mg, 0.400 mmol, 2.00 equiv) in a single portion. The reaction was then stirred for 16 h at 20  $^\circ\text{C}$  (Procedure F) or 40  $^\circ\text{C}$  (Procedure G). The mixture was then concentrated in vacuo, and the residue was purified by silica gel flash chromatography using EtOAc:hexanes as eluent to afford the corresponding aziridine (**6**).

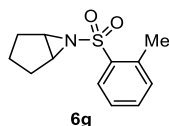

**6-(*o*-Tolylsulfonyl)-6-azabicyclo[3.1.0]hexane (6g).** Prepared via Procedure F from 2-methylbenzenesulfonamide (34.2 mg, 0.200 mmol) and obtained as a white solid (10.4 mg, 22%).  $^1\text{H}$  NMR (400 MHz,  $\text{CDCl}_3$ ) 7.93 (dd,  $J = 7.9, 1.5$  Hz, 1H), 7.48 (td,  $J = 7.6, 1.5$  Hz, 1H), 7.37–7.28 (m, 2H), 3.39 (s, 2H), 2.76 (s, 3H), 1.98–1.93 (m, 2H), 1.66–1.58 (m, 3H), 1.42–1.36 (m, 1H).  $^{13}\text{C}$  NMR (126 MHz,  $\text{CDCl}_3$ )  $\delta$  138.8, 137.8, 133.2, 132.6, 128.9, 126.0, 46.9, 27.2, 20.7, 19.7. HRMS-ESI $^+$  ( $m/z$ ):  $[\text{M}+\text{H}]^+$  calcd. for  $\text{C}_{12}\text{H}_{15}\text{NO}_2\text{S}$ , 238.0896; found, 238.0893.

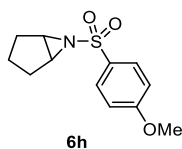

**6-((4-Methoxyphenyl)sulfonyl)-6-azabicyclo[3.1.0]hexane (6h).** Prepared via Procedure F from 4-methoxybenzenesulfonamide (37.4 mg, 0.200 mmol) and obtained as a white solid (11.2 mg, 22%).  $^1\text{H}$  NMR (400 MHz,  $\text{CDCl}_3$ ) 7.86 (d,  $J = 9.0$  Hz, 1H), 6.99 (d,  $J = 9.0$  Hz, 1H), 3.88 (s, 3H), 3.31 (s, 2H), 1.97–1.90 (m, 2H), 1.65–1.57 (m, 3H), 1.44–1.37 (m, 1H).  $^{13}\text{C}$  NMR (126 MHz,  $\text{CDCl}_3$ )  $\delta$  163.5, 130.9, 129.9, 114.3, 55.8, 46.8, 27.1, 19.7. HRMS-ESI $^+$  ( $m/z$ ):  $[\text{M}+\text{H}]^+$  calcd. for  $\text{C}_{12}\text{H}_{15}\text{NO}_3\text{S}$ , 253.0845; found, 254.0842.

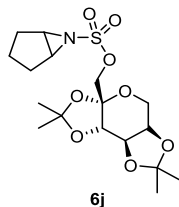

*((3a*S*,5a*S*,8a*R*,8b*S*)-2,2,7,7-Tetramethyltetrahydro-3a*H*-bis([1,3]dioxolo)[4,5-*b*:4',5'-*d*]pyran-3a-yl)methyl 6-azabicyclo[3.1.0]hexane-6-sulfonate (6j)*. Prepared via Procedure G from topiramate (67.8 mg, 0.200 mmol) and obtained as a white solid (8.6 mg, 11%). <sup>1</sup>H NMR (400 MHz, CDCl<sub>3</sub>) 4.62 (dt, *J* = 8.0, 2.4 Hz, 1H), 4.41–4.36 (m, 2H), 4.32 (dd, *J* = 10.3, 2.2 Hz, 1H), 4.24 (dd, *J* = 8.2, 1.7 Hz, 1H), 3.92 (dt, *J* = 13.0, 2.1 Hz, 1H), 3.78 (dd, *J* = 13.0, 2.3 Hz, 1H), 3.35 (s, 2H), 2.14–2.07 (m, 2H), 1.71–1.60 (m, 3H), 1.55 (s, 3H), 1.50–1.39 (m, 7H), 1.34 (s, 3H). <sup>13</sup>C NMR (126 MHz, CDCl<sub>3</sub>) δ 109.4, 109.3, 100.9, 71.2, 70.8, 70.2, 70.2, 61.5, 48.0, 47.9, 27.0, 27.0, 26.7, 26.0, 25.4, 24.2, 19.5. HRMS-ESI<sup>+</sup> (*m/z*): [M+H]<sup>+</sup> calcd. for C<sub>17</sub>H<sub>27</sub>NO<sub>8</sub>S, 406.1530; found, 406.1523.

## C. Reaction optimization studies

### C.1 Optimization of aliphatic olefin aziridination

**Table S1. Evaluation of the impact of HFIP loadings on aziridination.** Reactions were carried out using 0.050 mmol of **1a** following Procedure A in dry CH<sub>2</sub>Cl<sub>2</sub> (1.0 mL). Yields were determined by <sup>1</sup>H NMR analysis of the reaction mixture with triethyl 1,3,5-benzenetricarboxylate as the internal standard. The optimal condition is highlighted in red.

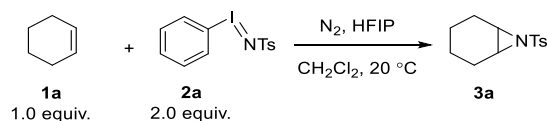

| Entry | HFIP loading | NMR yield |
|-------|--------------|-----------|
| 1     | 0.0 equiv    | 10%       |
| 2     | 2.0 equiv    | 24%       |
| 3     | 10.0 equiv   | 38%       |
| 4     | as solvent   | 63%       |



**Table S2. Evaluation of the impact of temperature on aziridination.** Reactions were carried out using 0.050 mmol of **1a** following Procedure A in dry HFIP (1.0 mL). Yields were determined by <sup>1</sup>H NMR analysis of the reaction mixture with triethyl 1,3,5-benzenetricarboxylate as the internal standard. The optimal condition is highlighted in red.

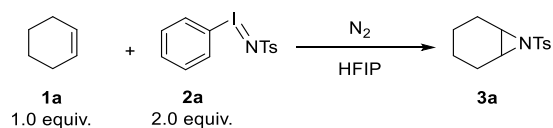

| Entry    | Temperature  | NMR yield  |
|----------|--------------|------------|
| <b>1</b> | <b>20 °C</b> | <b>63%</b> |
| 2        | 30 °C        | 50%        |
| 3        | 40 °C        | 48%        |
| 4        | 50 °C        | 43%        |

**Table S3. Evaluation of the impact of concentration and scale on aziridination.** Reactions were carried out using **1a** as substrate following Procedure A in dry HFIP. Yields were determined by <sup>1</sup>H NMR analysis of the reaction mixture with triethyl 1,3,5-benzenetricarboxylate as the internal standard. The optimal condition is highlighted in red.

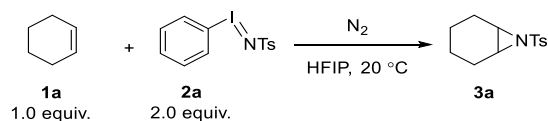

| Entry | 1a loading | 1a concentration | NMR yield |
|-------|------------|------------------|-----------|
| 1     | 0.050 mmol | 0.050 M          | 63%       |
| 2     | 0.200 mmol | 0.200 M          | 67%       |

**Table S4. Evaluation of the impact of iminoiodinane loading on aziridination.** Reactions were carried out using 0.200 mmol of **1a** following Procedure A in dry HFIP (1.0 mL). Yields were determined by <sup>1</sup>H NMR analysis of the reaction mixture with triethyl 1,3,5-benzenetricarboxylate as the internal standard. The optimal condition is highlighted in red.

| 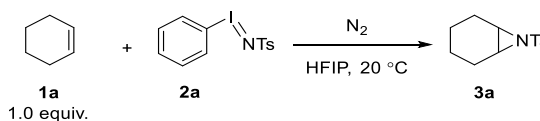 |            |           |
|------------------------------------------------------------------------------------|------------|-----------|
| Entry                                                                              | 2a loading | NMR yield |
| 1                                                                                  | 1.0 equiv  | 22%       |
| 2                                                                                  | 1.5 equiv  | 28%       |
| 3                                                                                  | 2.0 equiv  | 67%       |

**Table S5. Evaluation of the impact of fluorinated solvent on aziridination.** Reactions were carried out using 0.200 mmol of **1a** following Procedure A in dry solvent (1.0 mL). Yields were determined by <sup>1</sup>H NMR analysis of the reaction mixture with triethyl 1,3,5-benzenetricarboxylate as the internal standard. The optimal condition is highlighted in red.

| 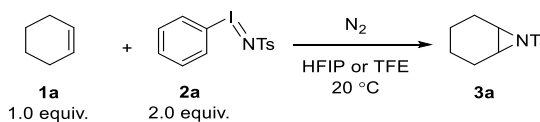 |         |           |
|------------------------------------------------------------------------------------|---------|-----------|
| Entry                                                                              | Solvent | NMR yield |
| 1                                                                                  | TFE     | 16%       |
| 2                                                                                  | HFIP    | 67%       |

**Table S6. Evaluation of alternative Lewis acids on aziridination.** Reactions were carried out using 0.200 mmol of **1a** following Procedure A with 1.0 mmol of additives in dry CH<sub>2</sub>Cl<sub>2</sub> (1.0 mL). Yields were determined by <sup>1</sup>H NMR analysis of the reaction mixture with triethyl 1,3,5-benzenetricarboxylate as the internal standard.

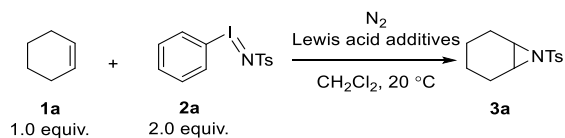

| Entry | Additive                          | NMR yield |
|-------|-----------------------------------|-----------|
| 1     | BF <sub>3</sub> ·OEt <sub>2</sub> | 0%        |
| 2     | TfOH                              | 0%        |
| 3     | Zn(OTf) <sub>2</sub>              | 0%        |

**Table S7. Evaluation of the impact of generating 2a *in situ* on aziridination.** Reactions were carried out using 0.200 mmol of **1a** following Procedure A varying loading of **5** in dry HFIP (1.0 mL). Yields were determined by <sup>1</sup>H NMR analysis of the reaction mixture with triethyl 1,3,5-benzenetricarboxylate as the internal standard.

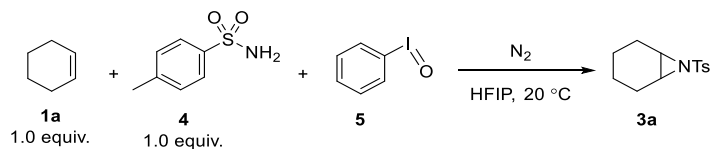

| Entry | Loading of 5 | NMR yield |
|-------|--------------|-----------|
| 1     | 1.0 equiv    | 19%       |
| 2     | 2.0 equiv    | 27%       |

**Table S8. Evaluation of the impact of light on aziridination.** Reactions were carried out using 0.200 mmol of **1a** following Procedure A in dry HFIP (1.0 mL). The reactions are carried out in the dark or under ambient lighting. Yields were determined by  $^1\text{H}$  NMR analysis of the reaction mixture with triethyl 1,3,5-benzenetricarboxylate as the internal standard.

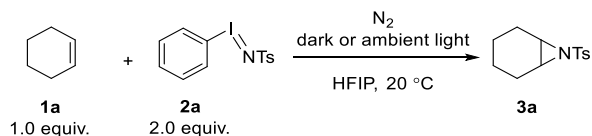

| Entry | Condition     | NMR yield |
|-------|---------------|-----------|
| 1     | dark          | 64%       |
| 2     | ambient light | 67%       |

## C.2 Challenging reaction partners

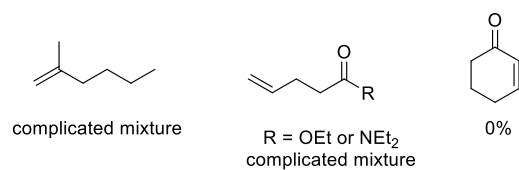

**Figure S1.** 1,1-Disubstituted olefins, those containing  $\alpha$ -carbonyl C–H bonds, and electron-poor olefins suffer from decomposition or low yields during aziridination.



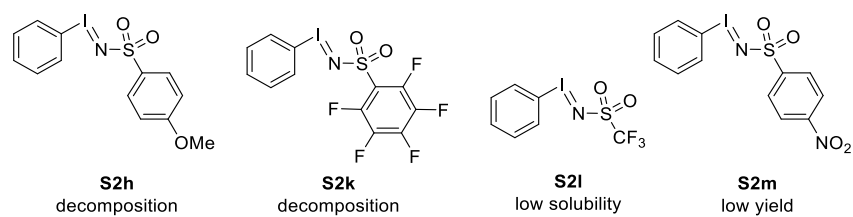

**Figure S2.** Aziridination utilizing unstable or very electron poor iminoiodinanes suffers from decomposition, low solubility in HFIP, or low reactivity during aziridination.

## D. Evaluation of aziridination mechanism

### Speciation of PhINTs in HFIP

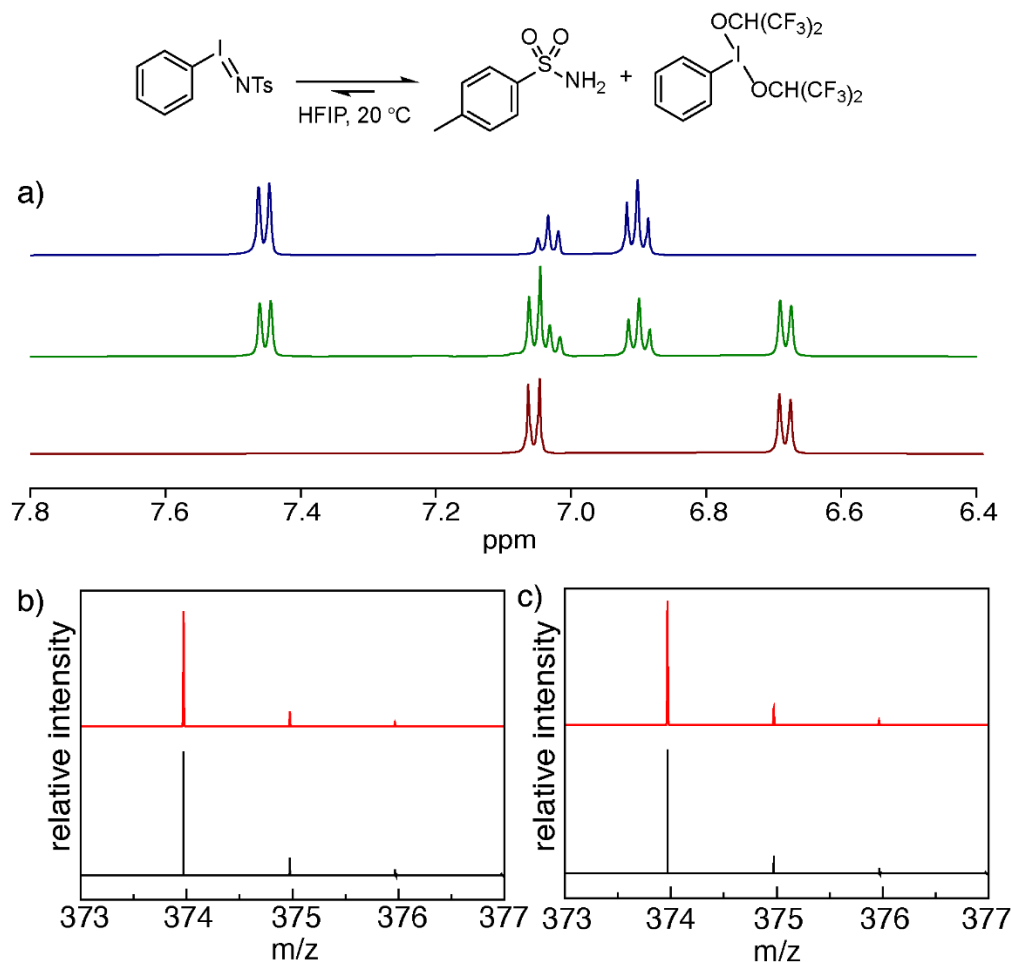

**Figure S3. NMR and mass spectroscopic experiments demonstrating PhINTs (2a) undergoing reaction with HFIP to reversibly afford ArI(OCH(CF<sub>3</sub>)<sub>2</sub>)<sub>2</sub> and TsNH<sub>2</sub>.** a) <sup>1</sup>H NMR spectra (externally referenced to CD<sub>3</sub>CN via a capillary) of PhIO in HFIP (blue line —), PhINTs in HFIP (green line —), and TsNH<sub>2</sub> in HFIP (red line —), b) Mass spectrometry analysis of a sample of 50 mM PhINTs in HFIP showing the presence of PhINTs (HRMS-ESI<sup>+</sup> (m/z): [M+H]<sup>+</sup> calcd. for C<sub>13</sub>H<sub>13</sub>INO<sub>2</sub>S<sup>+</sup>, 373.9706; found, 373.9701), and c) Mass spectrometry analysis of a sample of 50 mM PhIO and 50 mM TsNH<sub>2</sub> in HFIP showing the presence of PhINTs (HRMS-ESI<sup>+</sup> (m/z): [M+H]<sup>+</sup> calcd. for C<sub>13</sub>H<sub>13</sub>INO<sub>2</sub>S<sup>+</sup>, 373.9706; found, 373.9701).

*Mass Balance in the Aziridination of Cyclohexene*

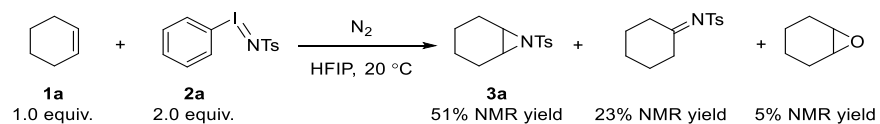

**Figure S4. Mass balance in the aziridination of cyclohexene.** Under an N<sub>2</sub> atmosphere, a 20-mL scintillation vial was charged with cyclohexene (**1a**, 20.2  $\mu$ L, 0.200 mmol, 1.00 equiv) and dry HFIP (1 mL). To this vial was added PhINTs (149 mg, 0.400 mmol, 2.00 equiv), and the reaction was stirred for 16 h at 20 °C. Triethyl 1,3,5-benzenetricarboxylate was then added as an internal standard; an aliquot of the reaction mixture was then taken, diluted with CD<sub>3</sub>CN, and subjected to <sup>1</sup>H NMR analysis. The reaction afforded 51% yield of aziridine product **3a** in, 23% imine, 5% cyclohexene oxide, and 3% unreacted cyclohexene.

### Control Reactions Using PhIO to Test for Epoxidation

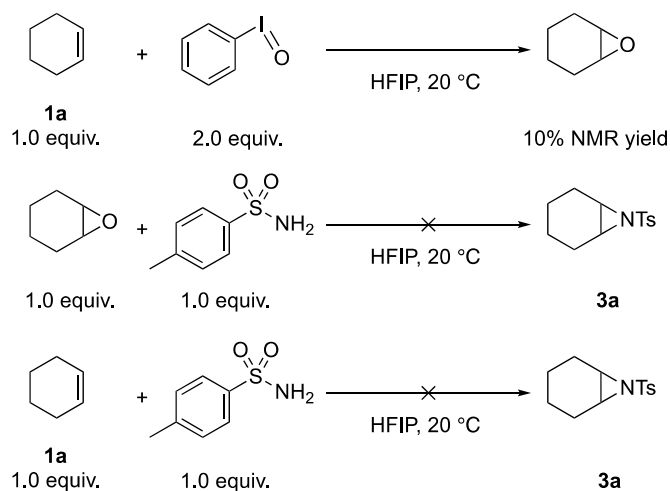

**Figure S5. Control reactions using PhIO to test for epoxidation.** a) Under an N<sub>2</sub> atmosphere, a 20-mL scintillation vial was charged with cyclohexene (**1a**, 20.2  $\mu$ L, 0.200 mmol, 1.00 equiv) and dry HFIP (1 mL). To this vial was added PhIO (44.0 mg, 0.400 mmol, 2.00 equiv), and the reaction was stirred for 16 h at 20 °C. An aliquot was then taken, diluted with CDCl<sub>3</sub>, and subjected to <sup>1</sup>H NMR analysis. Cyclohexene oxide was formed in <10% NMR yield using triethyl 1,3,5-benzenetricarboxylate as the internal standard. b) Under an N<sub>2</sub> atmosphere, a 20-mL scintillation vial was charged with cyclohexene (**1a**, 20.2  $\mu$ L, 0.200 mmol, 1.00 equiv) and dry HFIP (1 mL). To this vial was added TsNH<sub>2</sub> (34.2 mg, 0.200 mmol, 1.00 equiv), and the reaction was stirred for 16 h at 20 °C. An aliquot was then taken, diluted with CDCl<sub>3</sub>, and subjected to <sup>1</sup>H NMR analysis. The aziridine product **3a** was not observed. c) Under an N<sub>2</sub> atmosphere, a 20-mL scintillation vial was charged with cyclohexene oxide (24.2  $\mu$ L, 0.200 mmol, 1.00 equiv) and dry HFIP (1 mL). To this vial was added TsNH<sub>2</sub> (34.2 mg, 0.200 mmol, 1.00 equiv), and the reaction was stirred for 16 h at 20 °C. An aliquot was then taken, diluted with CDCl<sub>3</sub>, and subjected to <sup>1</sup>H NMR analysis. The aziridine product **3a** was not observed.

*Aziridination of Cyclopentene in the Presence of PBN*

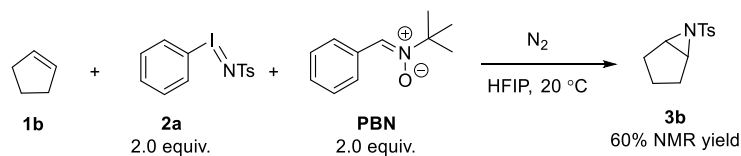

**Figure S6. Aziridination of Cyclopentene in the Presence of PBN.** Under an  $N_2$  atmosphere, a 20-mL scintillation vial was charged with cyclopentene (**1b**, 17.7  $\mu$ L, 0.200 mmol, 1.00 equiv), PBN (70.8 mg, 0.400 mmol, 2.00 equiv), and dry HFIP (1 mL). To this vial was added PhINTs (**2a**, 149 mg, 0.400 mmol, 2.00 equiv), and the reaction was stirred for 16 h at 20 °C. An aliquot was then taken, diluted with  $CDCl_3$ , and subjected to  $^1H$  NMR analysis. The aziridine product **3b** was formed in 60% NMR yield; unreacted PBN was observed (quantitative).

## Aziridination of *cis*- and *trans*- $\beta$ -methylstyrene

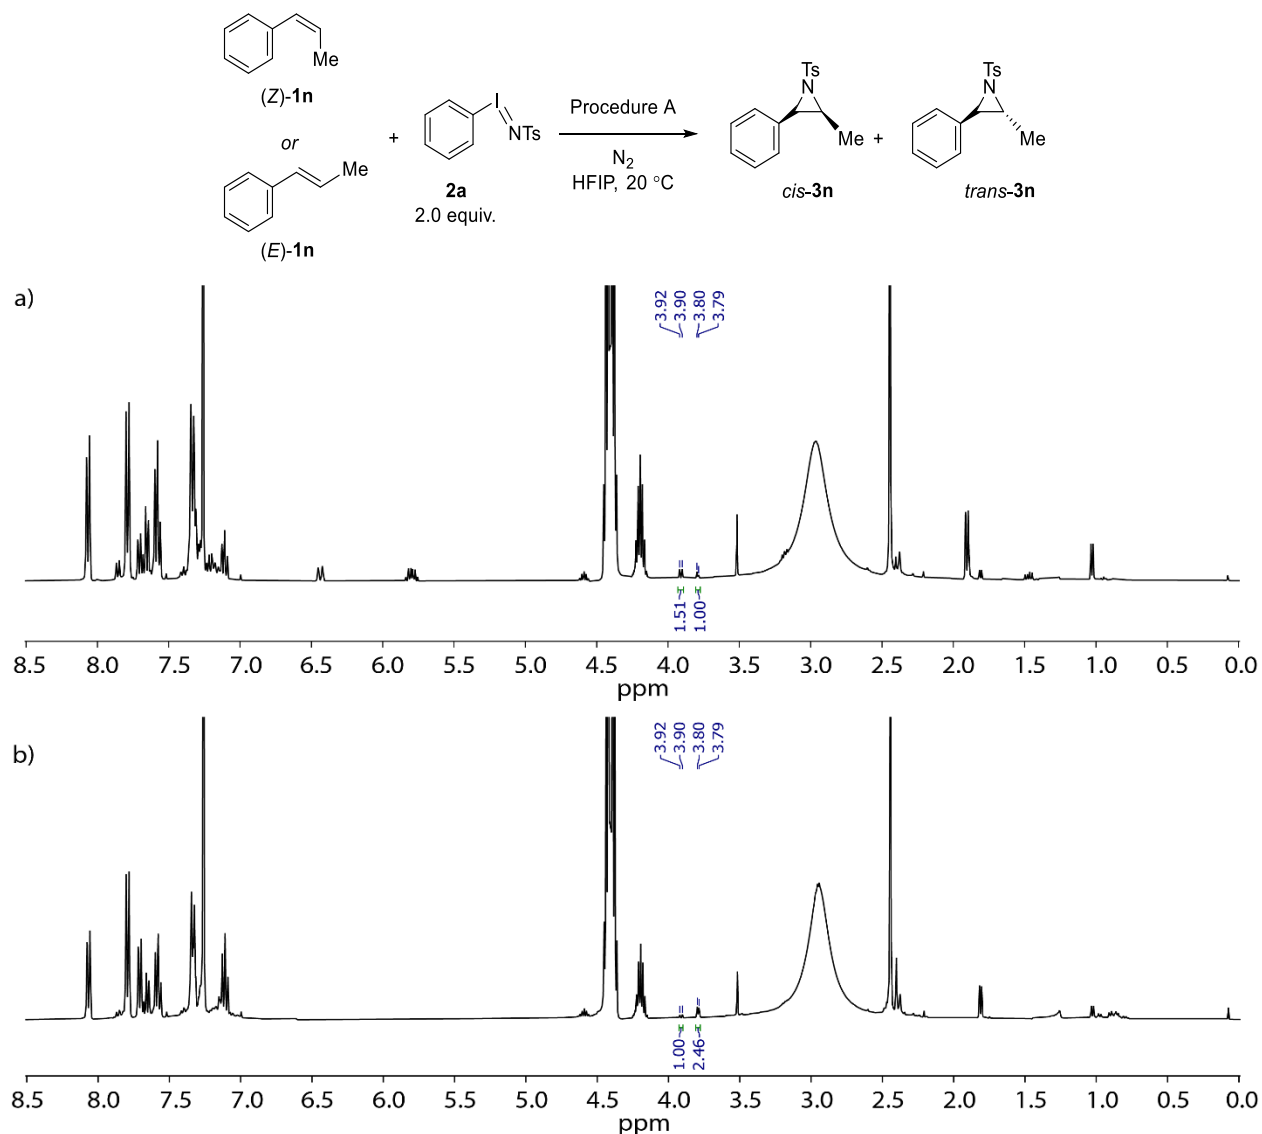

**Figure S7. Determination of diastereomeric distribution in the product in the aziridination of *cis*- or *trans*- $\beta$ -methylstyrene.** The reactions were carried out according to Procedure A using 0.200 mmol of styrene. An aliquot was then taken, diluted with CDCl<sub>3</sub>, and subjected to <sup>1</sup>H NMR analysis to determine the ratio of the *cis*- and *trans*-aziridine product 3n via the integrations at 3.91 ppm (d, *J* = 7.4 Hz, 1H, *cis*-3n) and 3.79 ppm (d, *J* = 4.8 Hz, 1H, *trans*-3n), respectively. a) Reaction using *cis*- $\beta$ -methylstyrene afforded aziridine product 3n as a diastereomeric mixture of 1.5:1.0 *c*:*t*, and b) Reaction using *trans*- $\beta$ -methylstyrene afforded aziridine product 3n as a diastereomeric mixture of 1.0:2.5 *c*:*t*.

Control reaction of *cis*- and *trans*- $\beta$ -methylstyrene in the absence of PhINTs

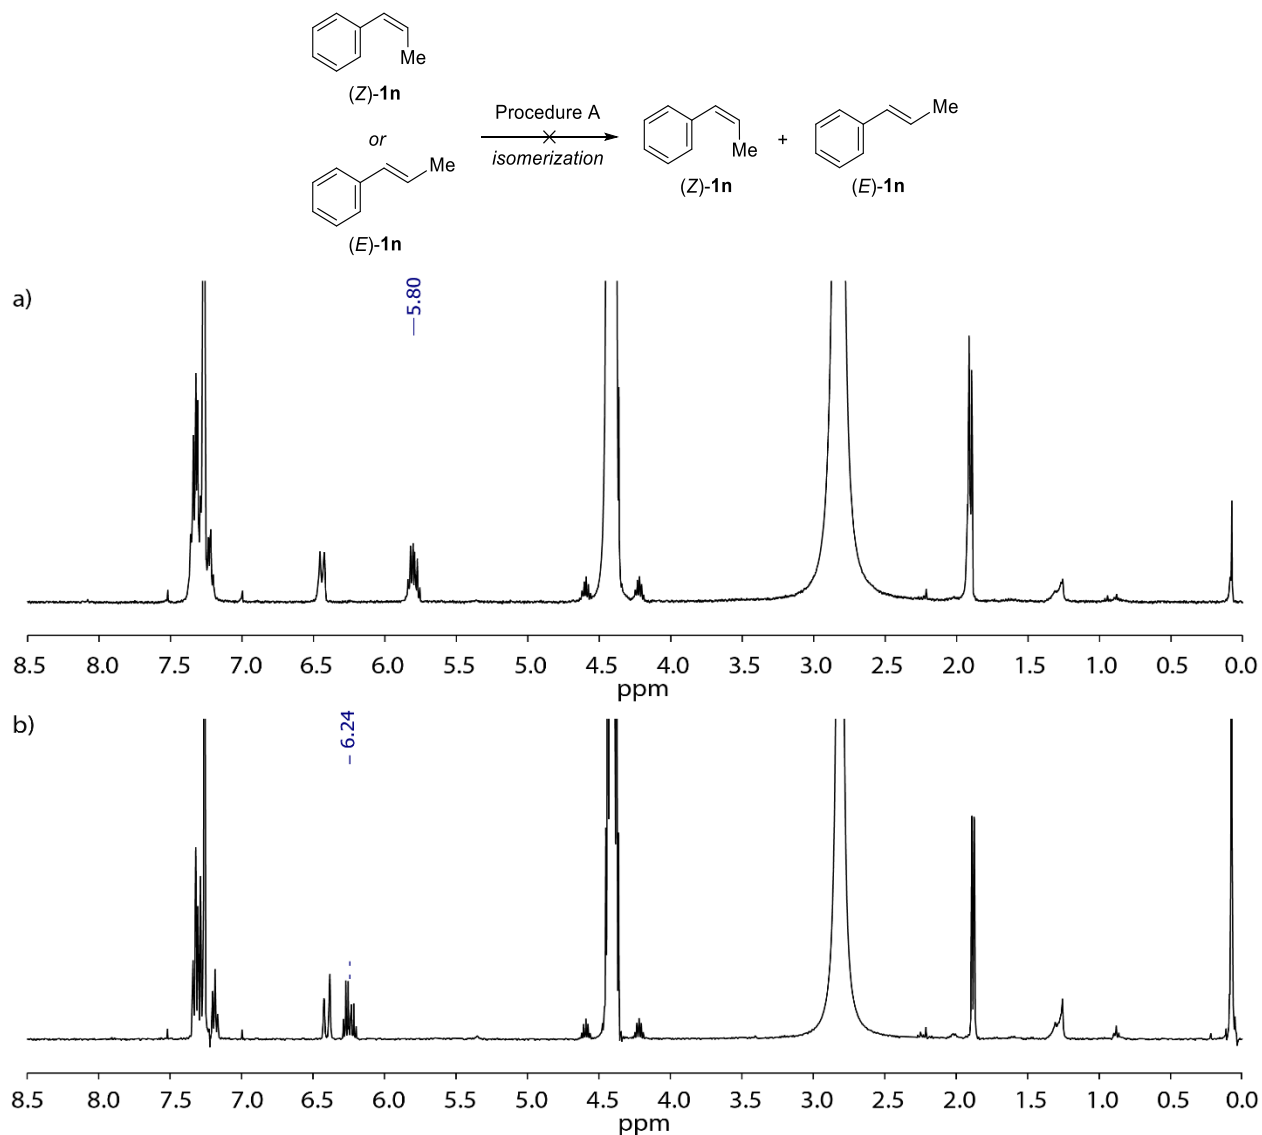

**Figure S8. Control reaction to check for isomerization of *cis*- and *trans*- $\beta$ -methylstyrene in HFIP.** The reactions were carried out according to Procedure A using 0.200 mmol of styrene in the absence of PhINTs (**2a**) to check for substrate isomerization in HFIP. After the reaction, an aliquot was then taken, diluted with CDCl<sub>3</sub>, and subjected to <sup>1</sup>H NMR analysis to determine the amount of the *cis*- or *trans*- $\beta$ -methylstyrene by analyzing the signals at 5.80 ppm (m, 1H, *cis*- $\beta$ -methylstyrene) and 6.24 ppm (m, 1H, *trans*- $\beta$ -methylstyrene). In both the a) reaction with *cis*- $\beta$ -methylstyrene and b) reaction with *trans*- $\beta$ -methylstyrene, no isomerization was observed.

### E. NMR Spectra for new compounds

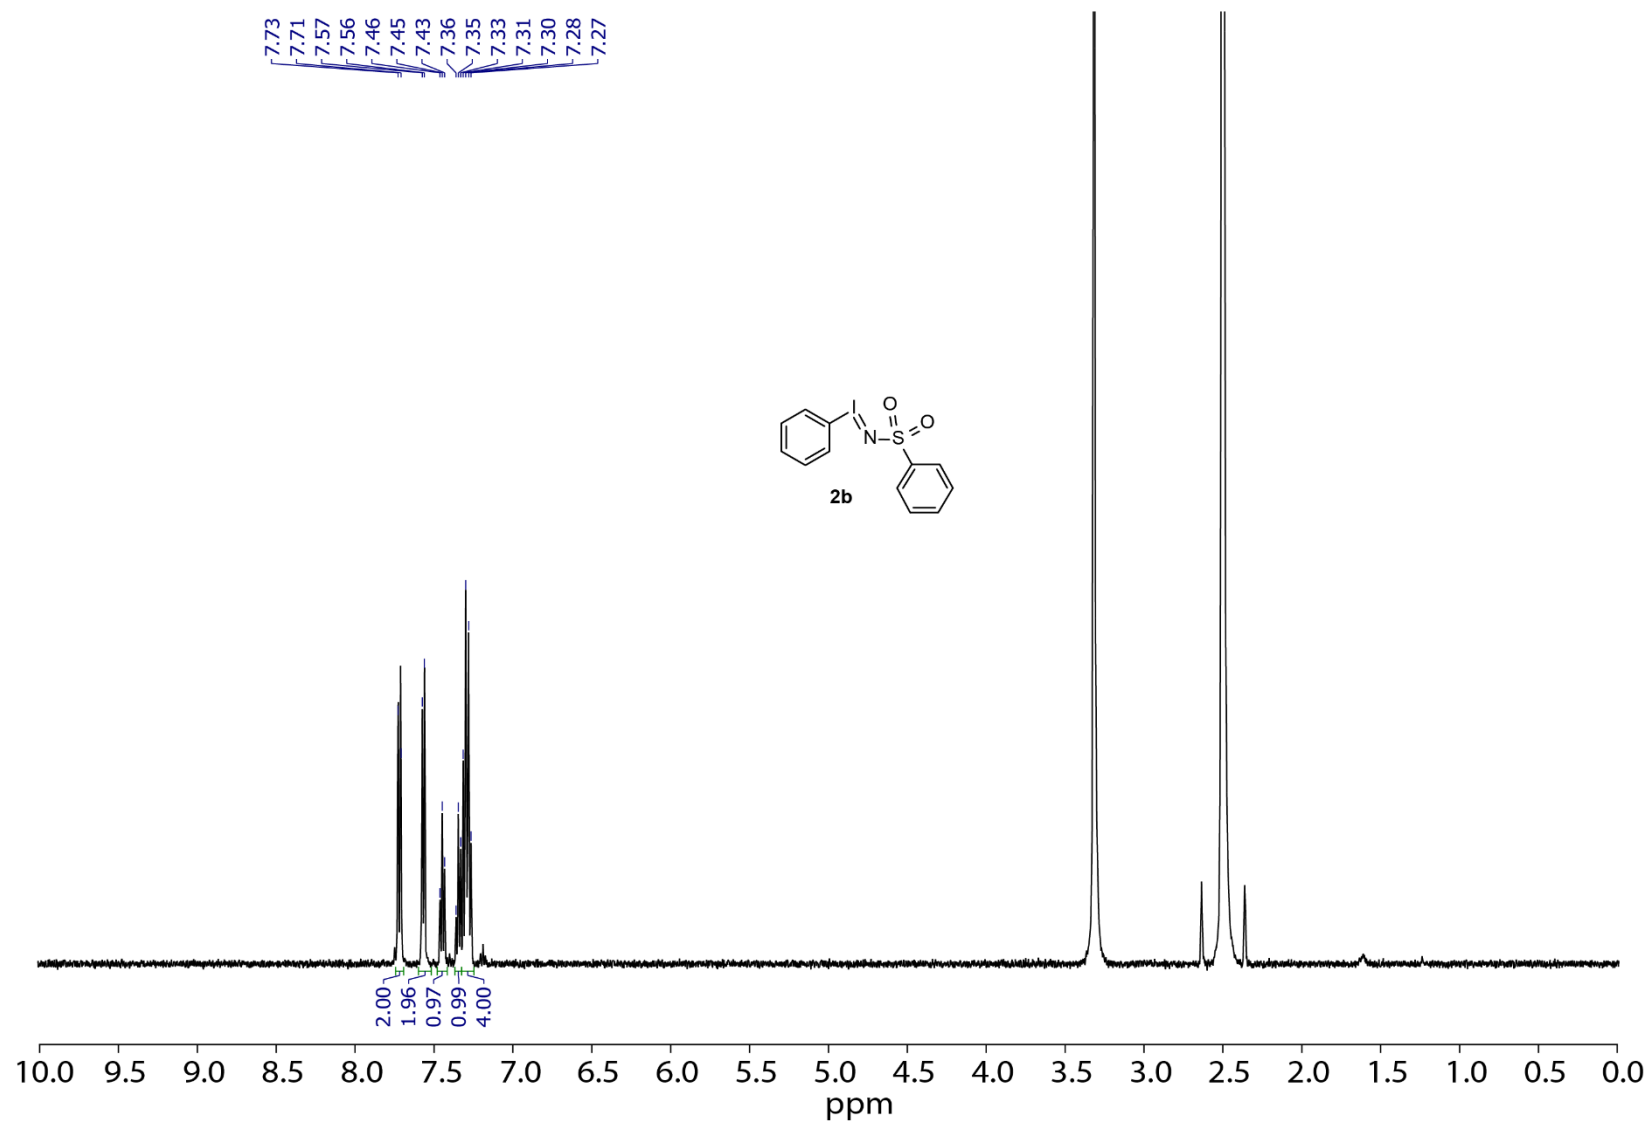

**Figure S9.** <sup>1</sup>H NMR spectrum of *N*-(phenyl-λ<sup>3</sup>-iodaneylidene)benzenesulfonamide (**2b**) in (CD<sub>3</sub>)<sub>2</sub>SO (400 MHz) at 23 °C.



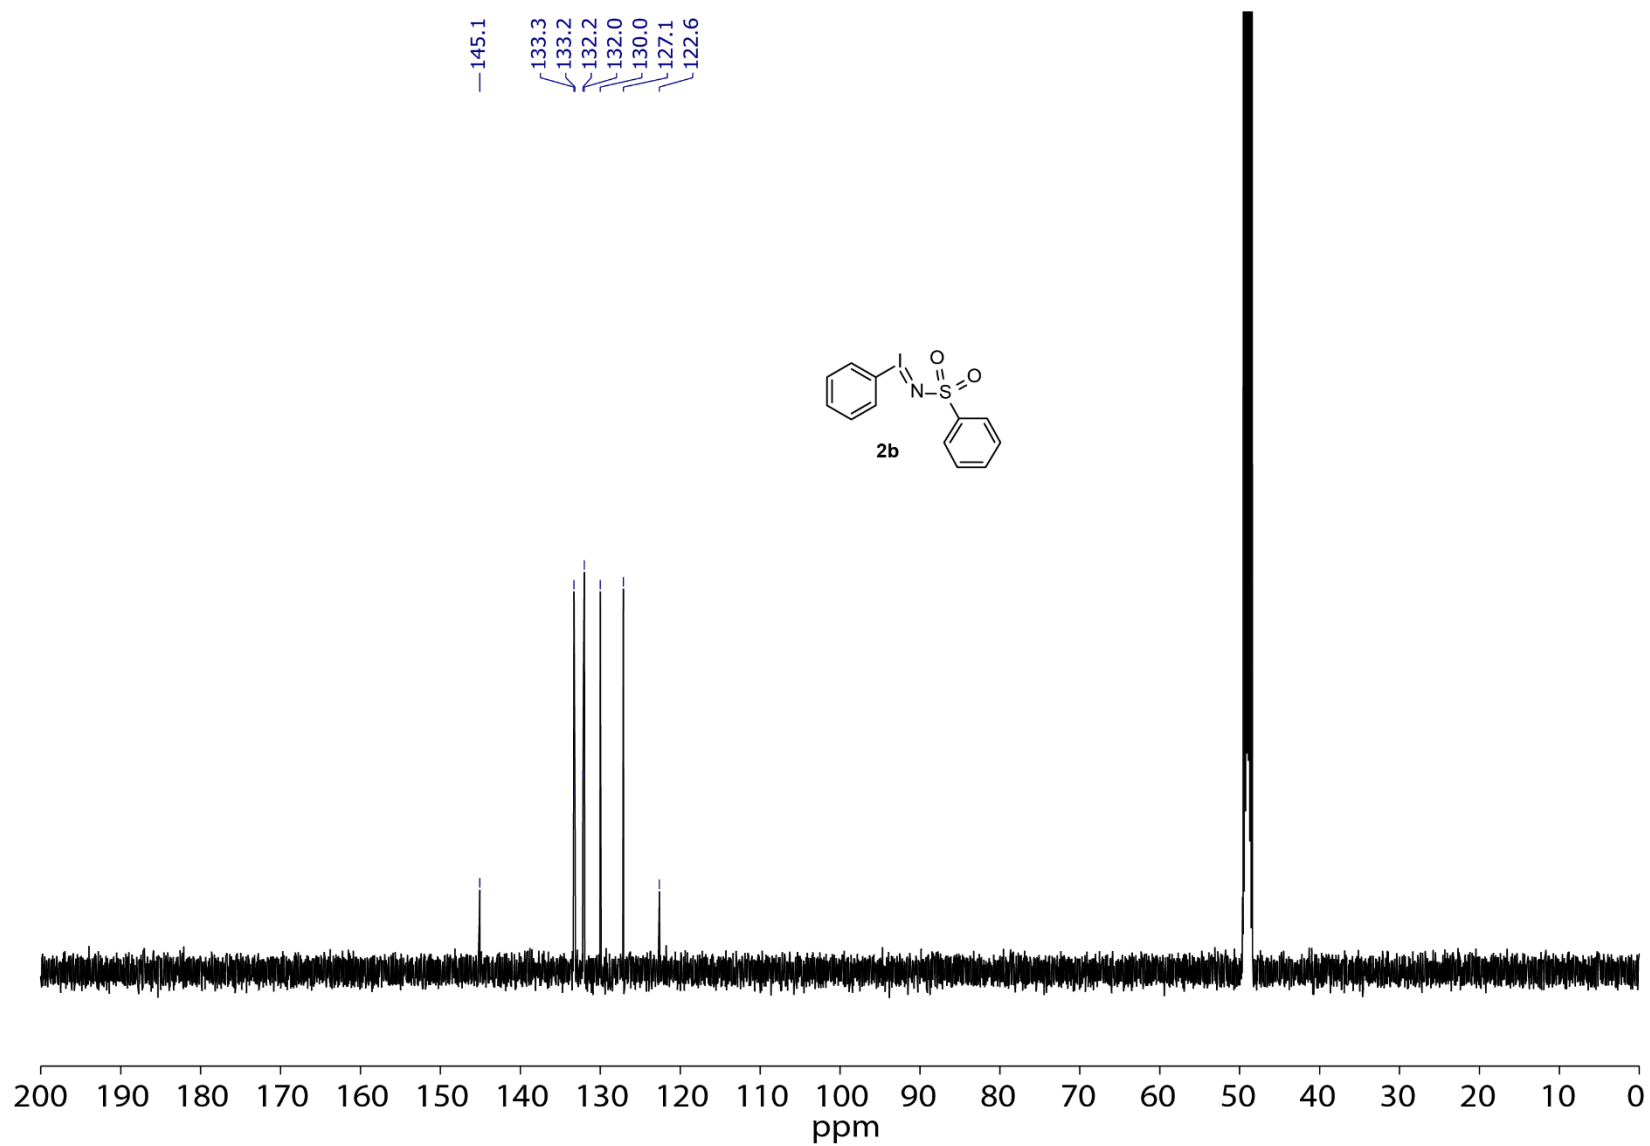

**Figure S10.**  $^{13}\text{C}$  NMR spectrum of *N*-(phenyl- $\lambda^3$ -iodaneylidene)benzenesulfonamide (**2b**) in  $\text{CD}_3\text{OD}$  (126 MHz) at 23 °C.

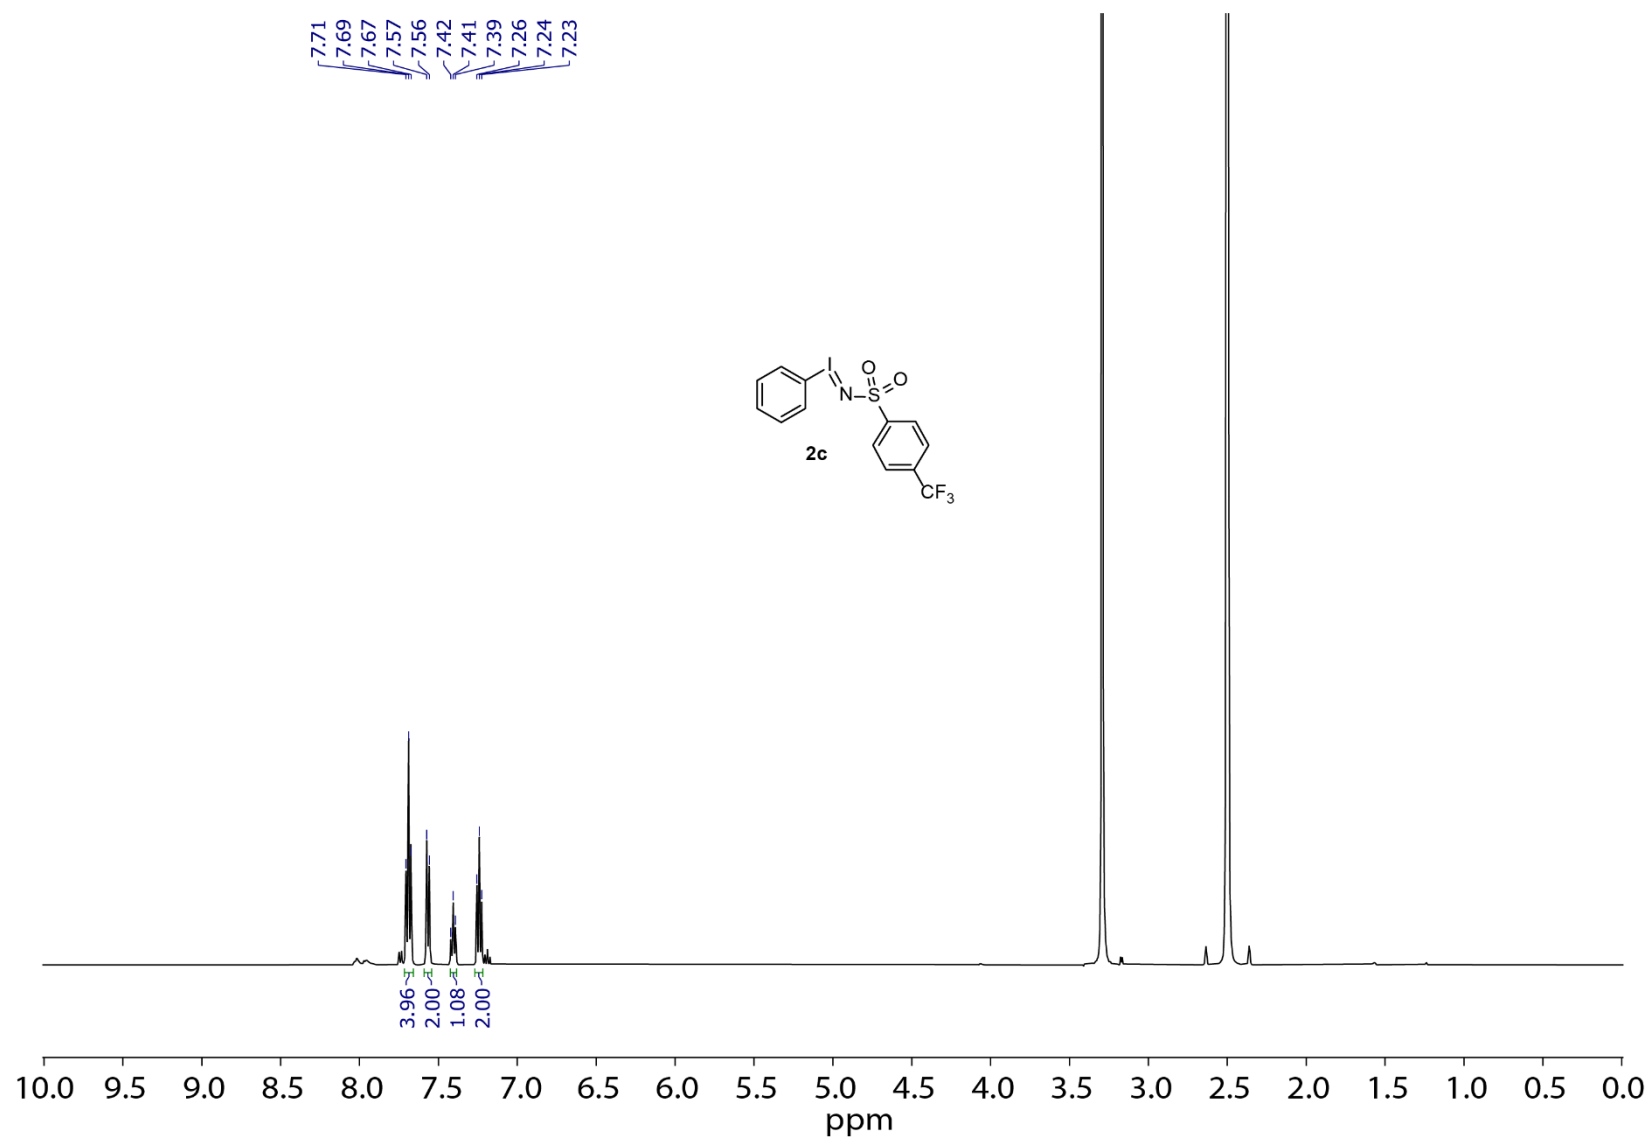

**Figure S11.**  $^1\text{H}$  NMR spectrum of *N*-(phenyl- $\lambda^3$ -iodaneylidene)-4-(trifluoromethyl)benzenesulfonamide (**2c**) in  $(\text{CD}_3)_2\text{SO}$  (400 MHz) at 23 °C.

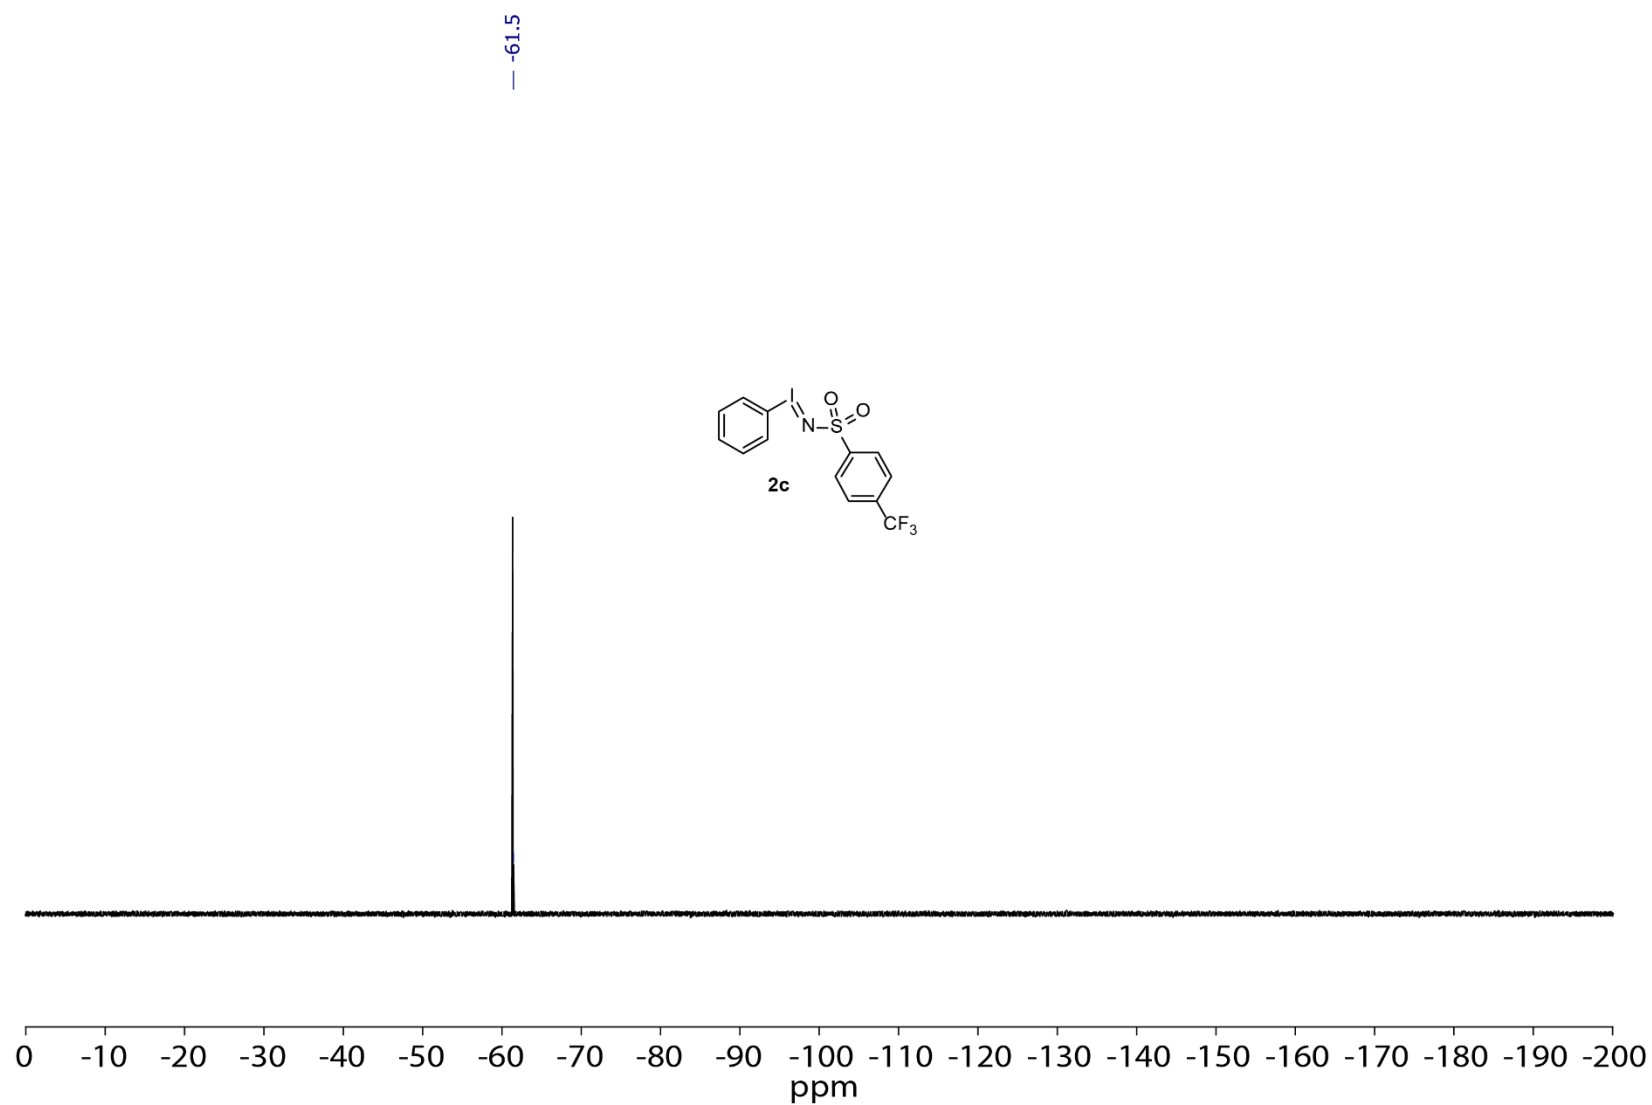

**Figure S12.**  $^{19}\text{F}$  NMR spectrum of *N*-(phenyl- $\lambda^3$ -iodaneylidene)-4-(trifluoromethyl)benzenesulfonamide (**2c**) in  $(\text{CD}_3)_2\text{SO}$  (377 MHz) at 23 °C.

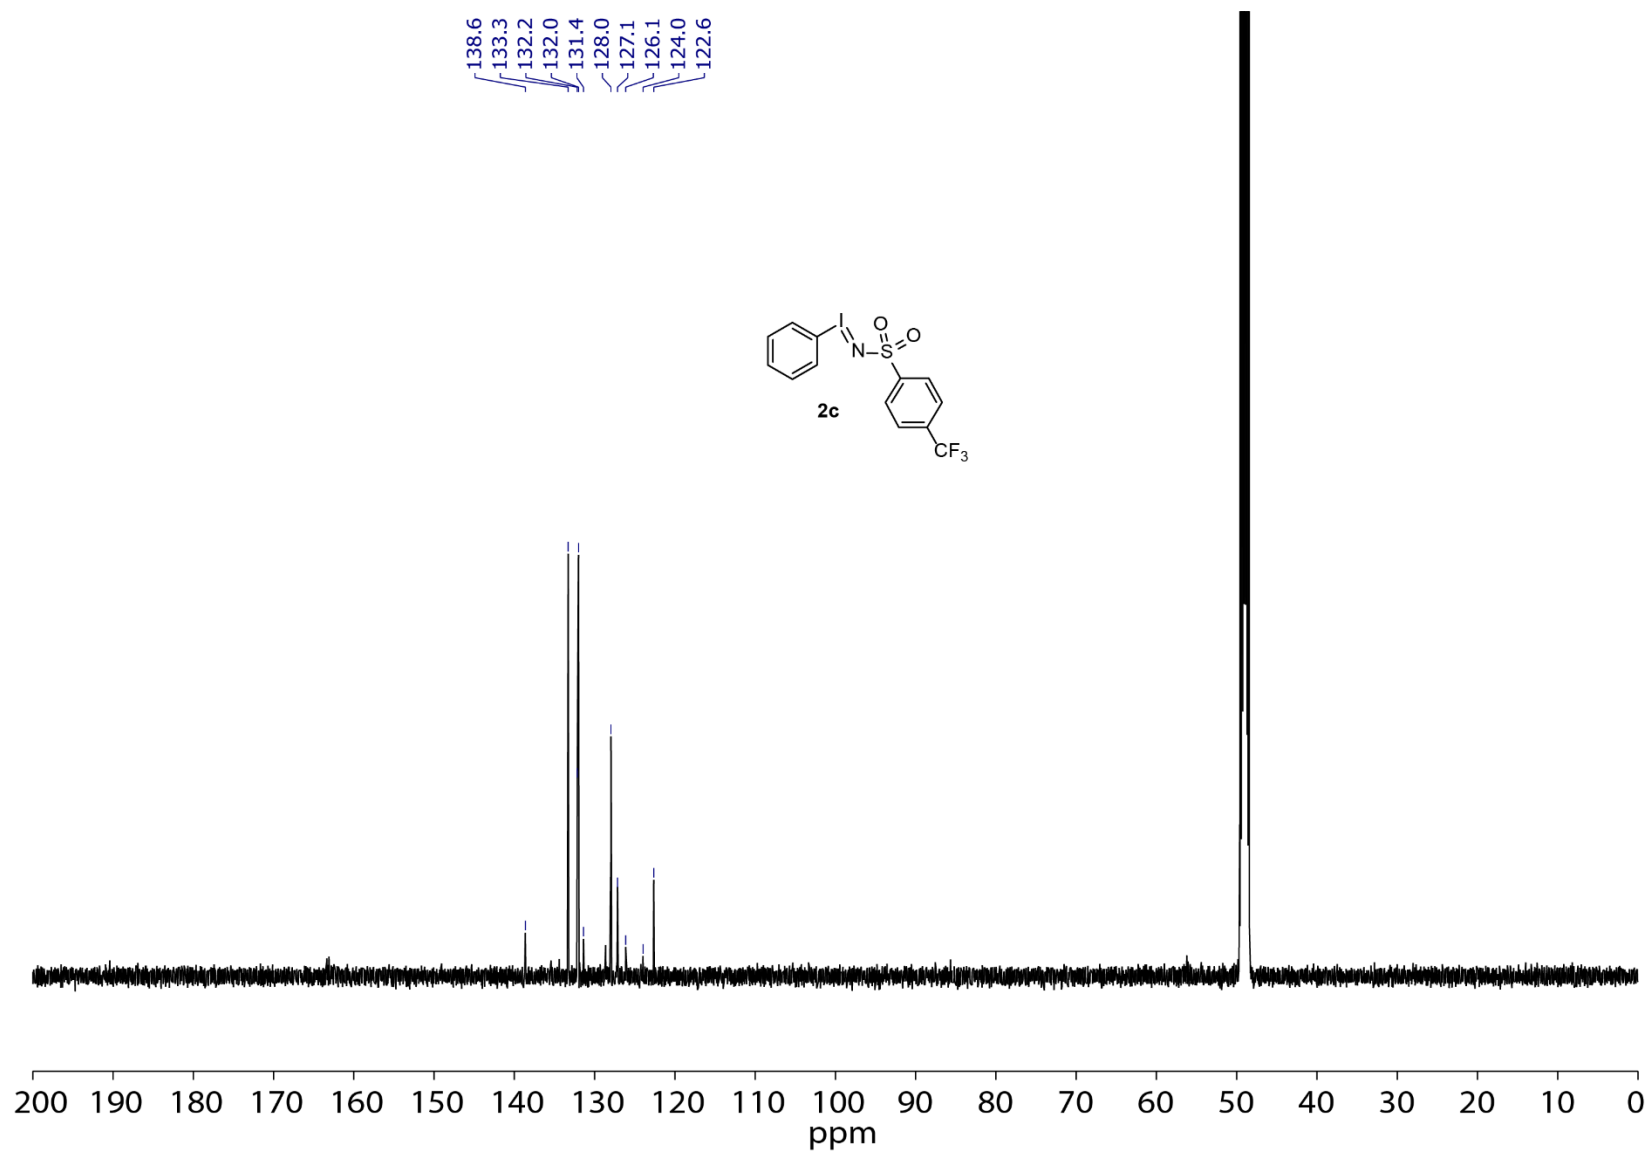

**Figure S13.** <sup>13</sup>C NMR spectrum of *N*-(phenyl-λ<sup>3</sup>-iodaneylidene)-4-(trifluoromethyl)benzenesulfonamide (**2c**) in CD<sub>3</sub>OD (126 MHz) at 23 °C.

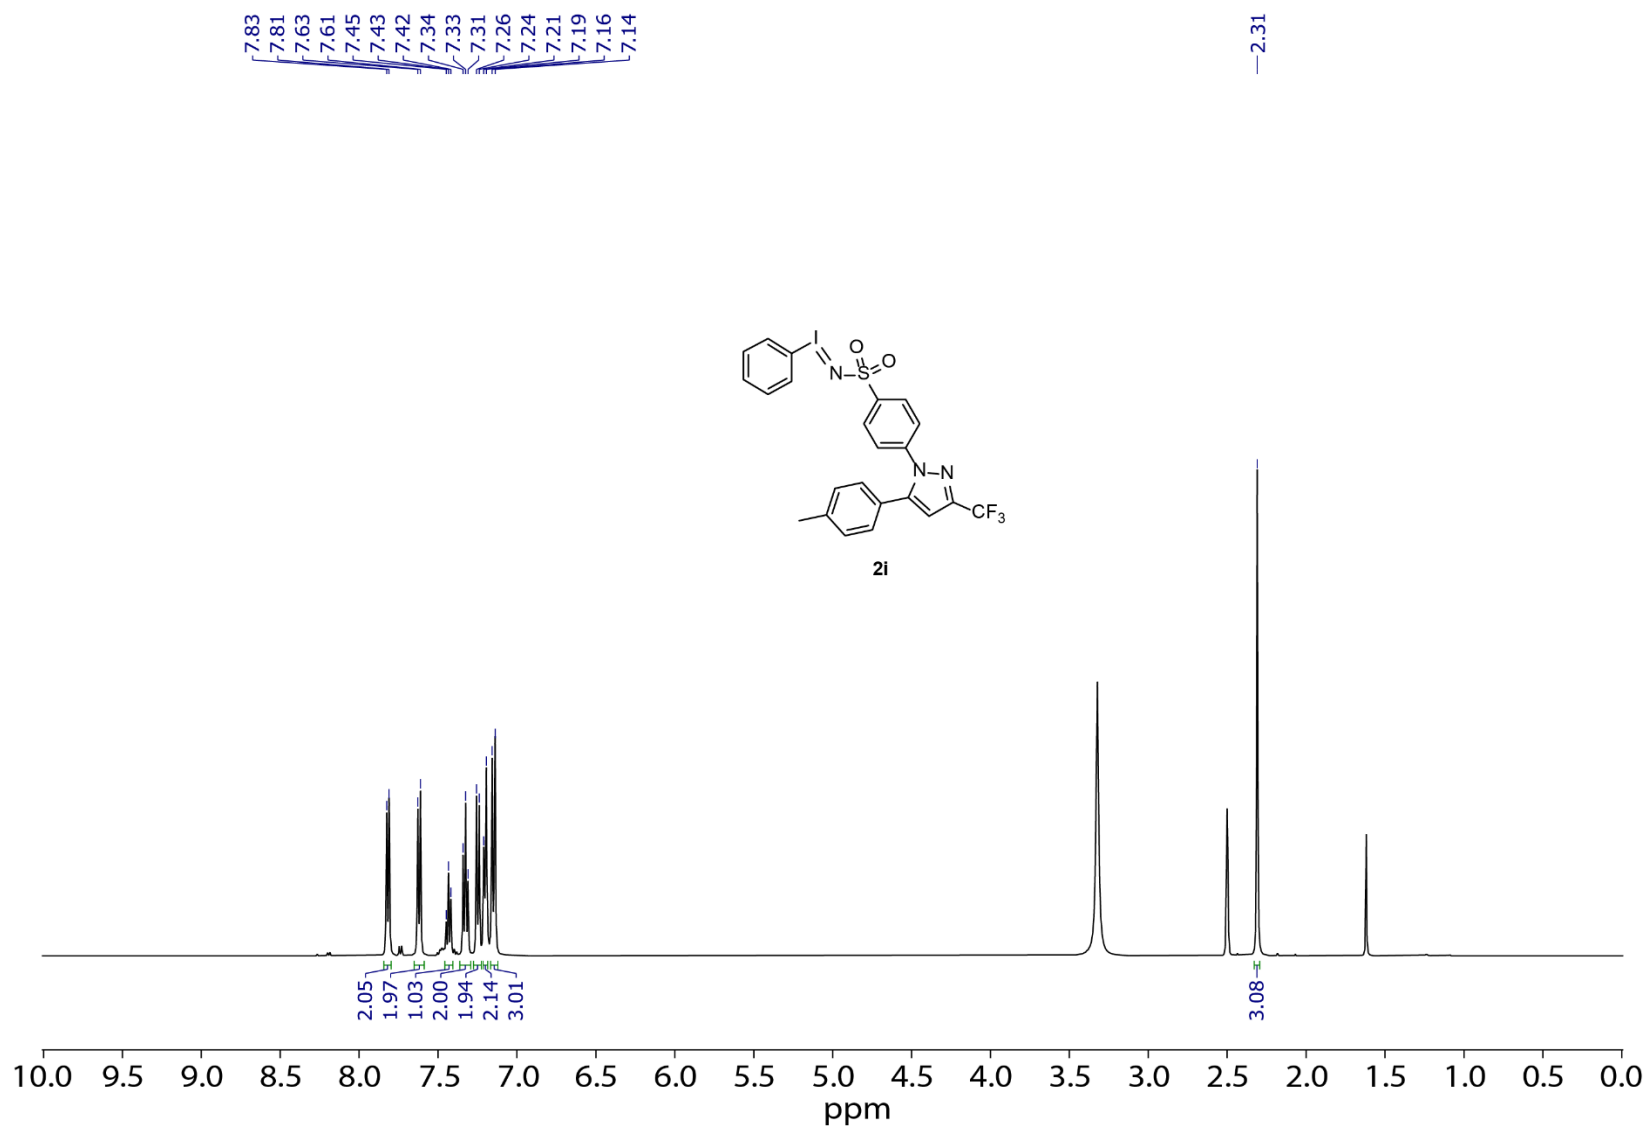

**Figure S14.** <sup>1</sup>H NMR spectrum of *N*-(phenyl- $\lambda^3$ -iodaneylidene)-4-(5-(*p*-tolyl)-3-(trifluoromethyl)-1*H*-pyrazol-1-yl)benzenesulfonamide (**2i**) in CDCl<sub>3</sub> (400 MHz) at 23 °C.

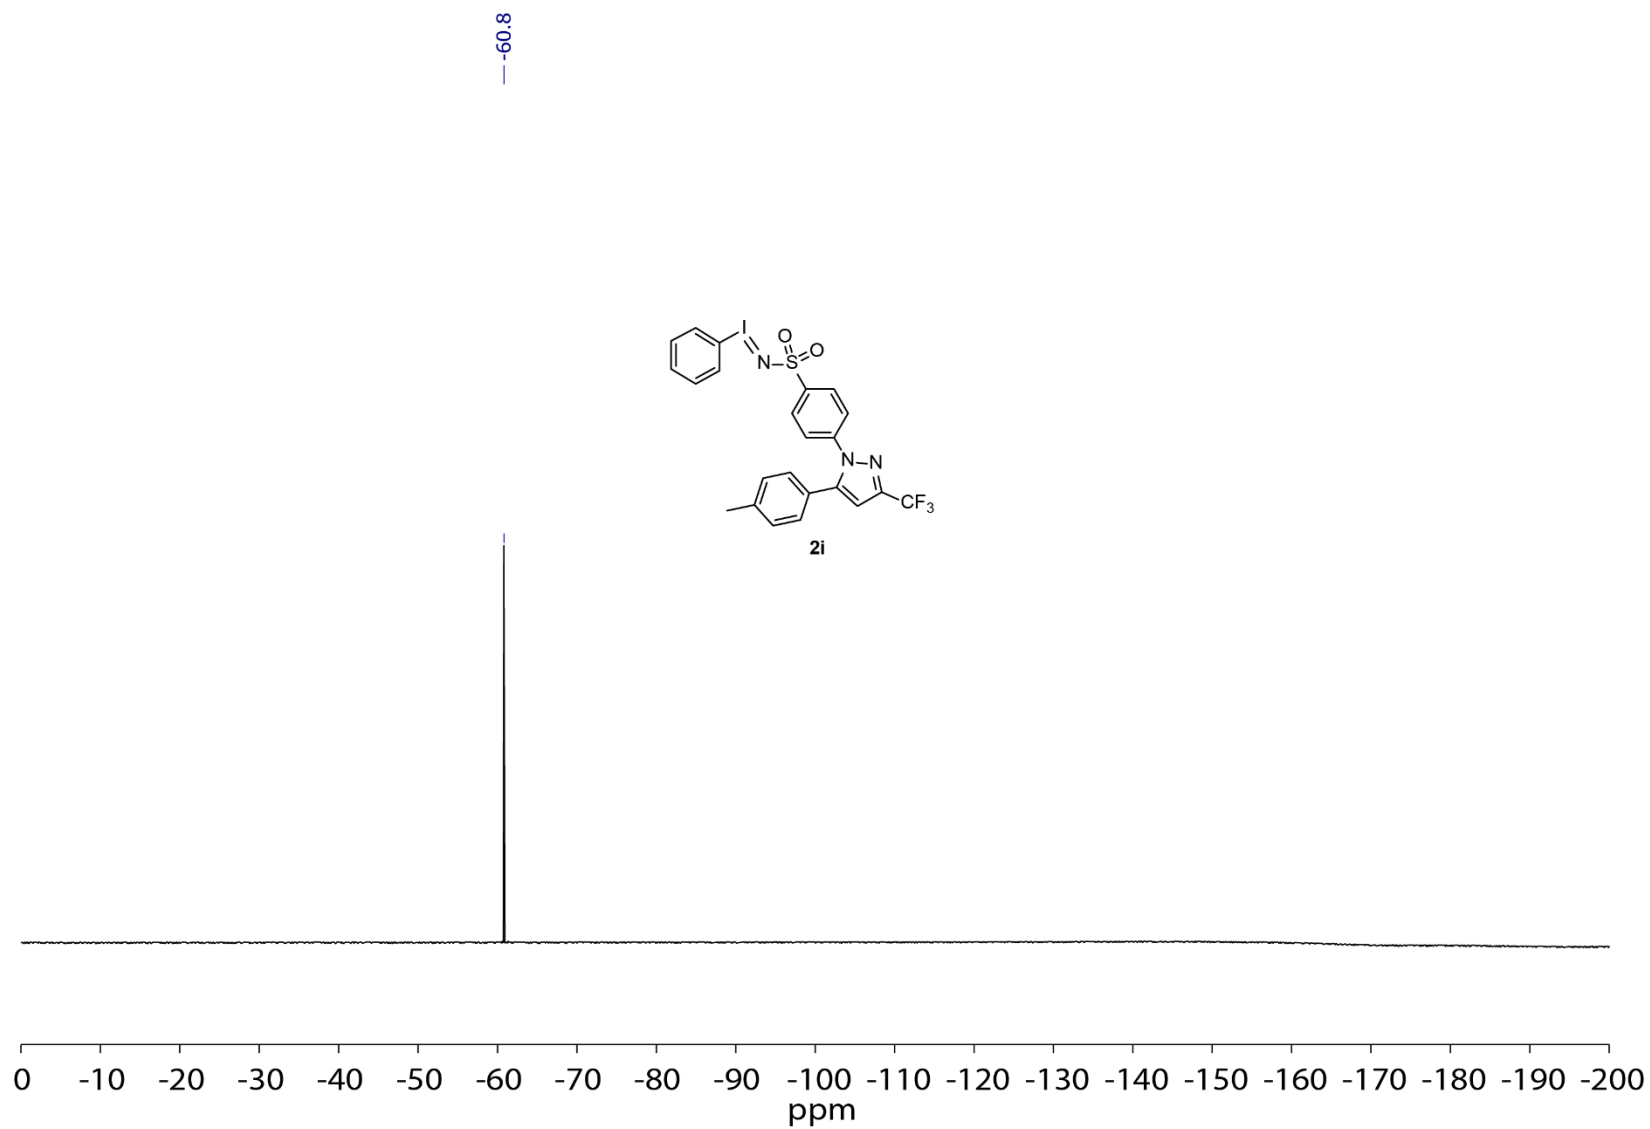

**Figure S15.**  $^{19}\text{F}$  NMR spectrum of *N*-(phenyl- $\lambda^3$ -iodaneylidene)-4-(5-(*p*-tolyl)-3-(trifluoromethyl)-1*H*-pyrazol-1-yl)benzenesulfonamide (**2i**) in  $\text{CDCl}_3$  (377 MHz) at 23 °C.

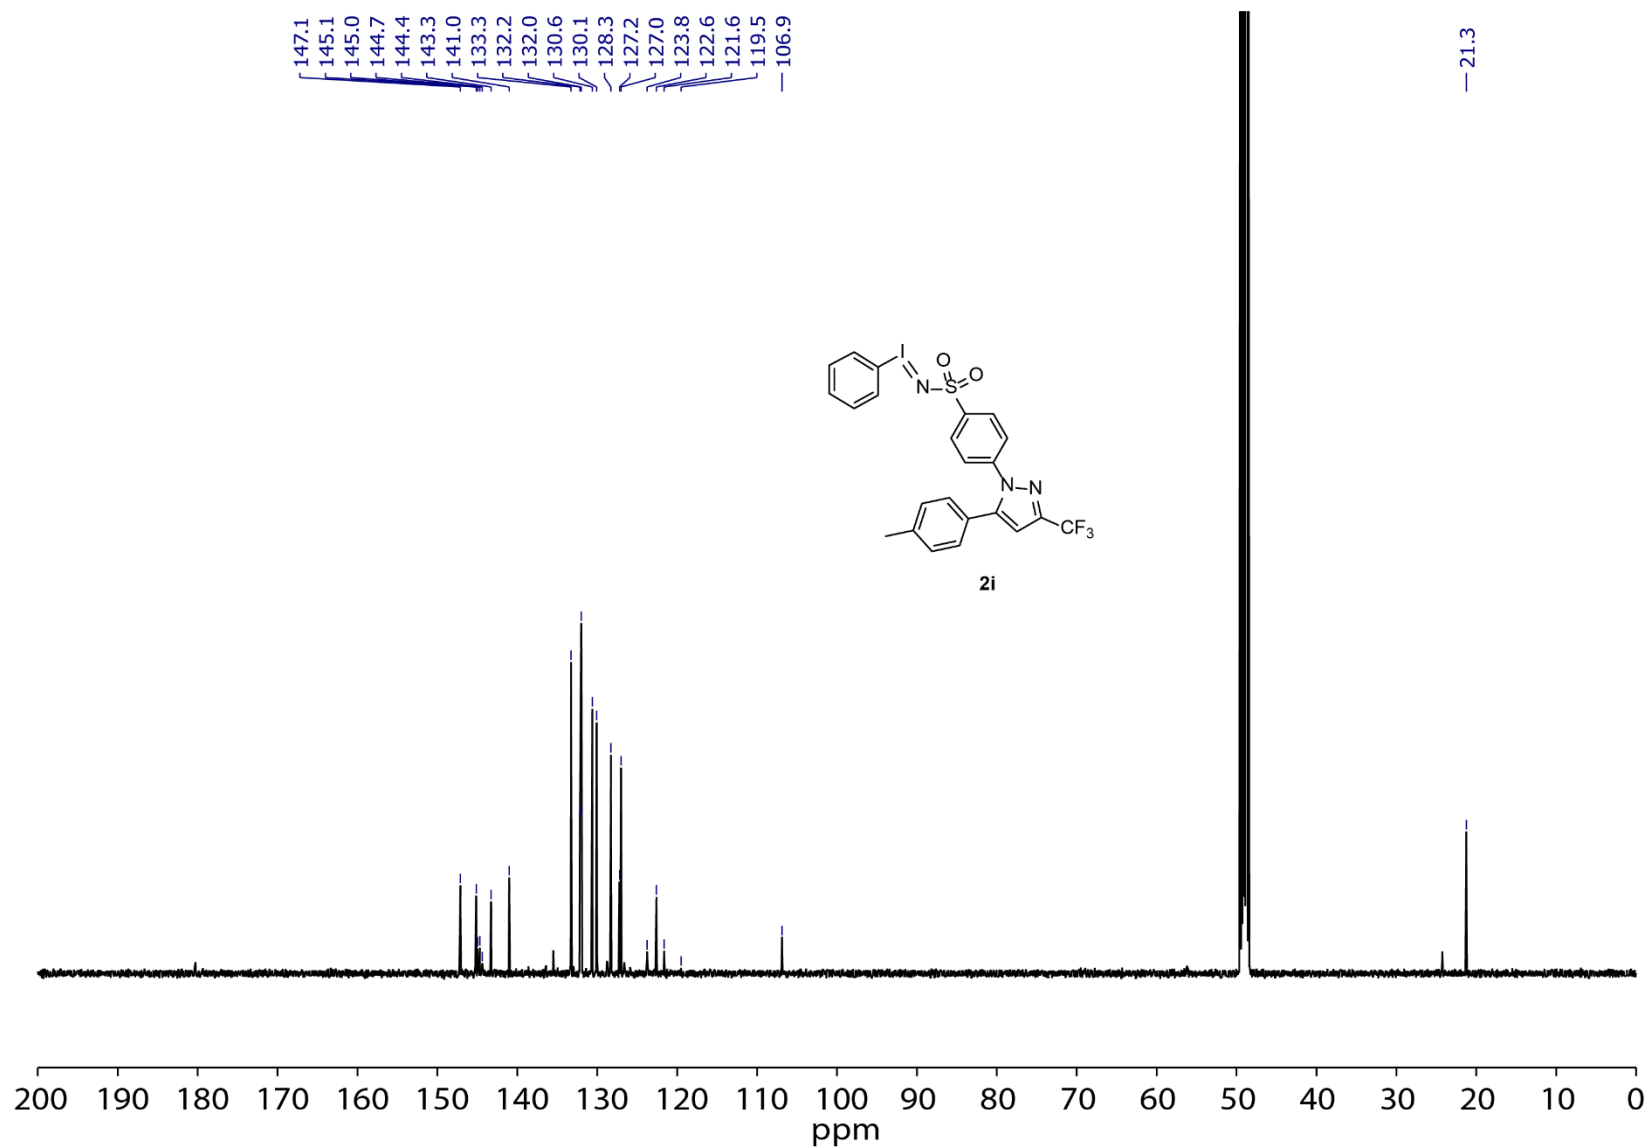

**Figure S16.** <sup>13</sup>C NMR spectrum of *N*-(phenyl-λ<sup>3</sup>-iodaneylidene)-4-(5-(*p*-tolyl)-3-(trifluoromethyl)-1*H*-pyrazol-1-yl)benzenesulfonamide (**2i**) in CD<sub>3</sub>OD (126 MHz) at 23 °C. Extra peaks are attributed to celecoxib.

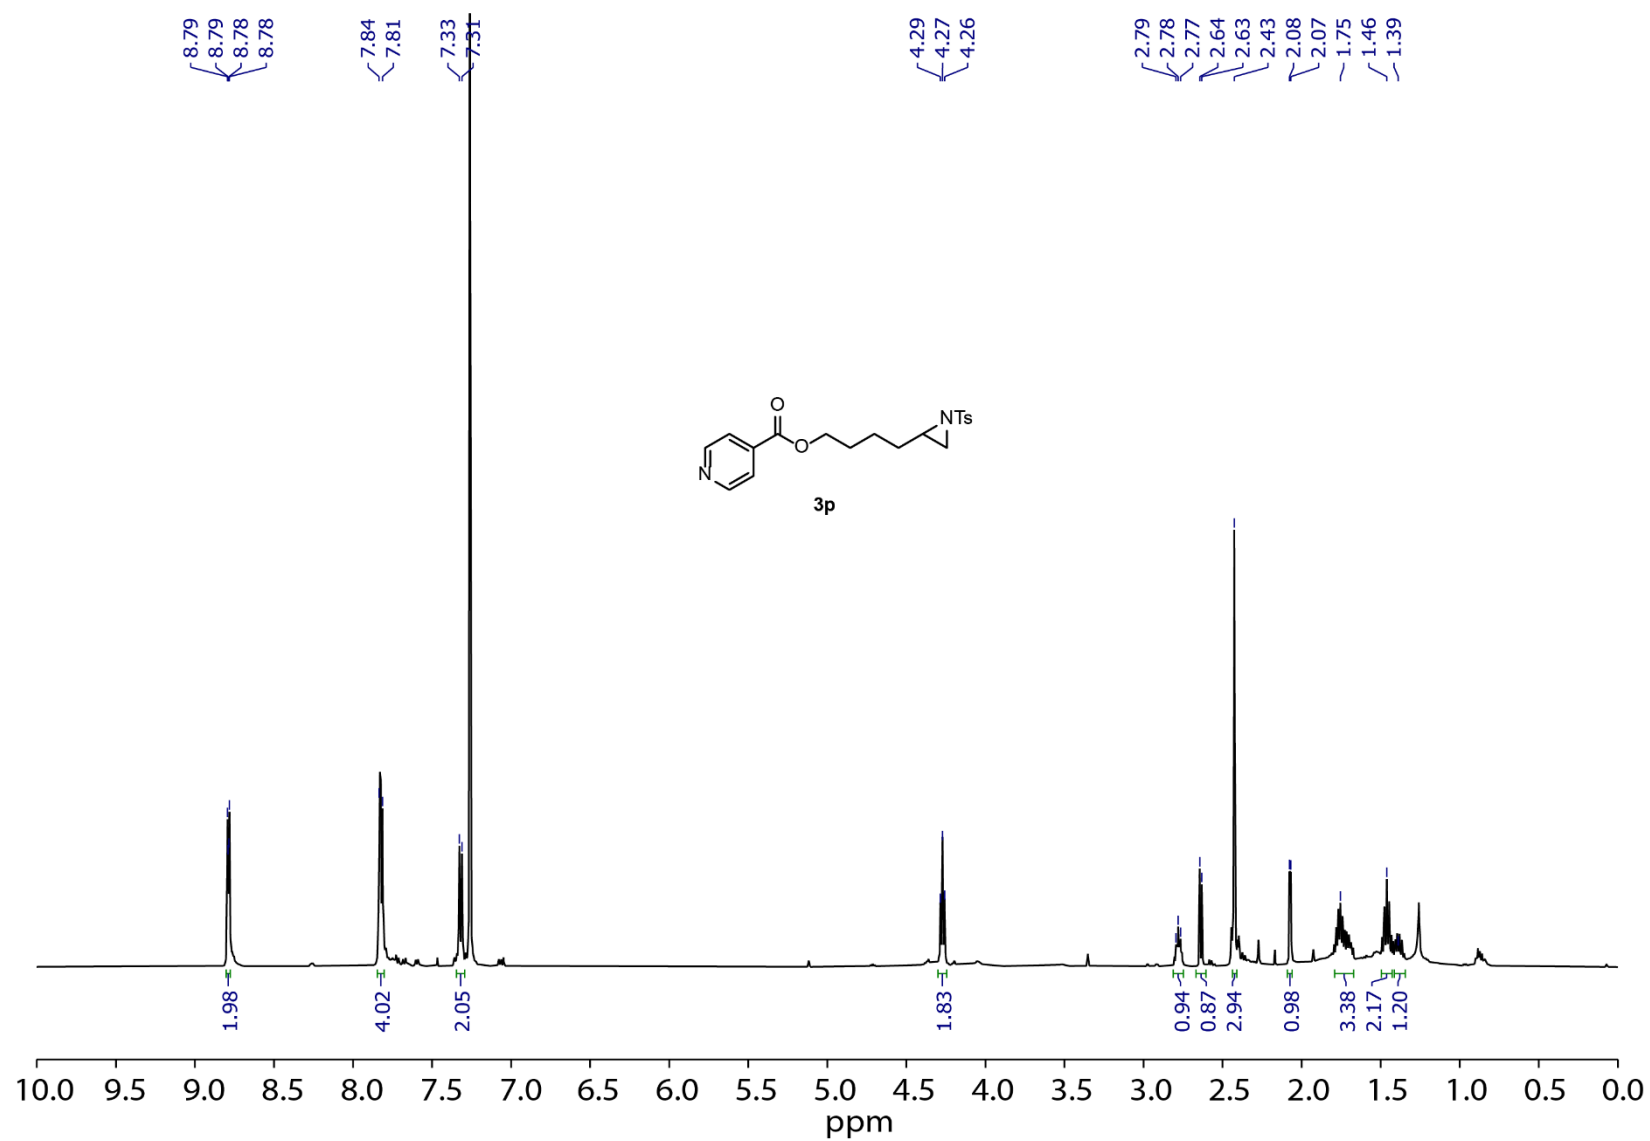

**Figure S17.** <sup>1</sup>H NMR spectrum of 4-(1-tosylaziridin-2-yl)butyl isonicotinate (**3p**) in CDCl<sub>3</sub> (400 MHz) at 23 °C.



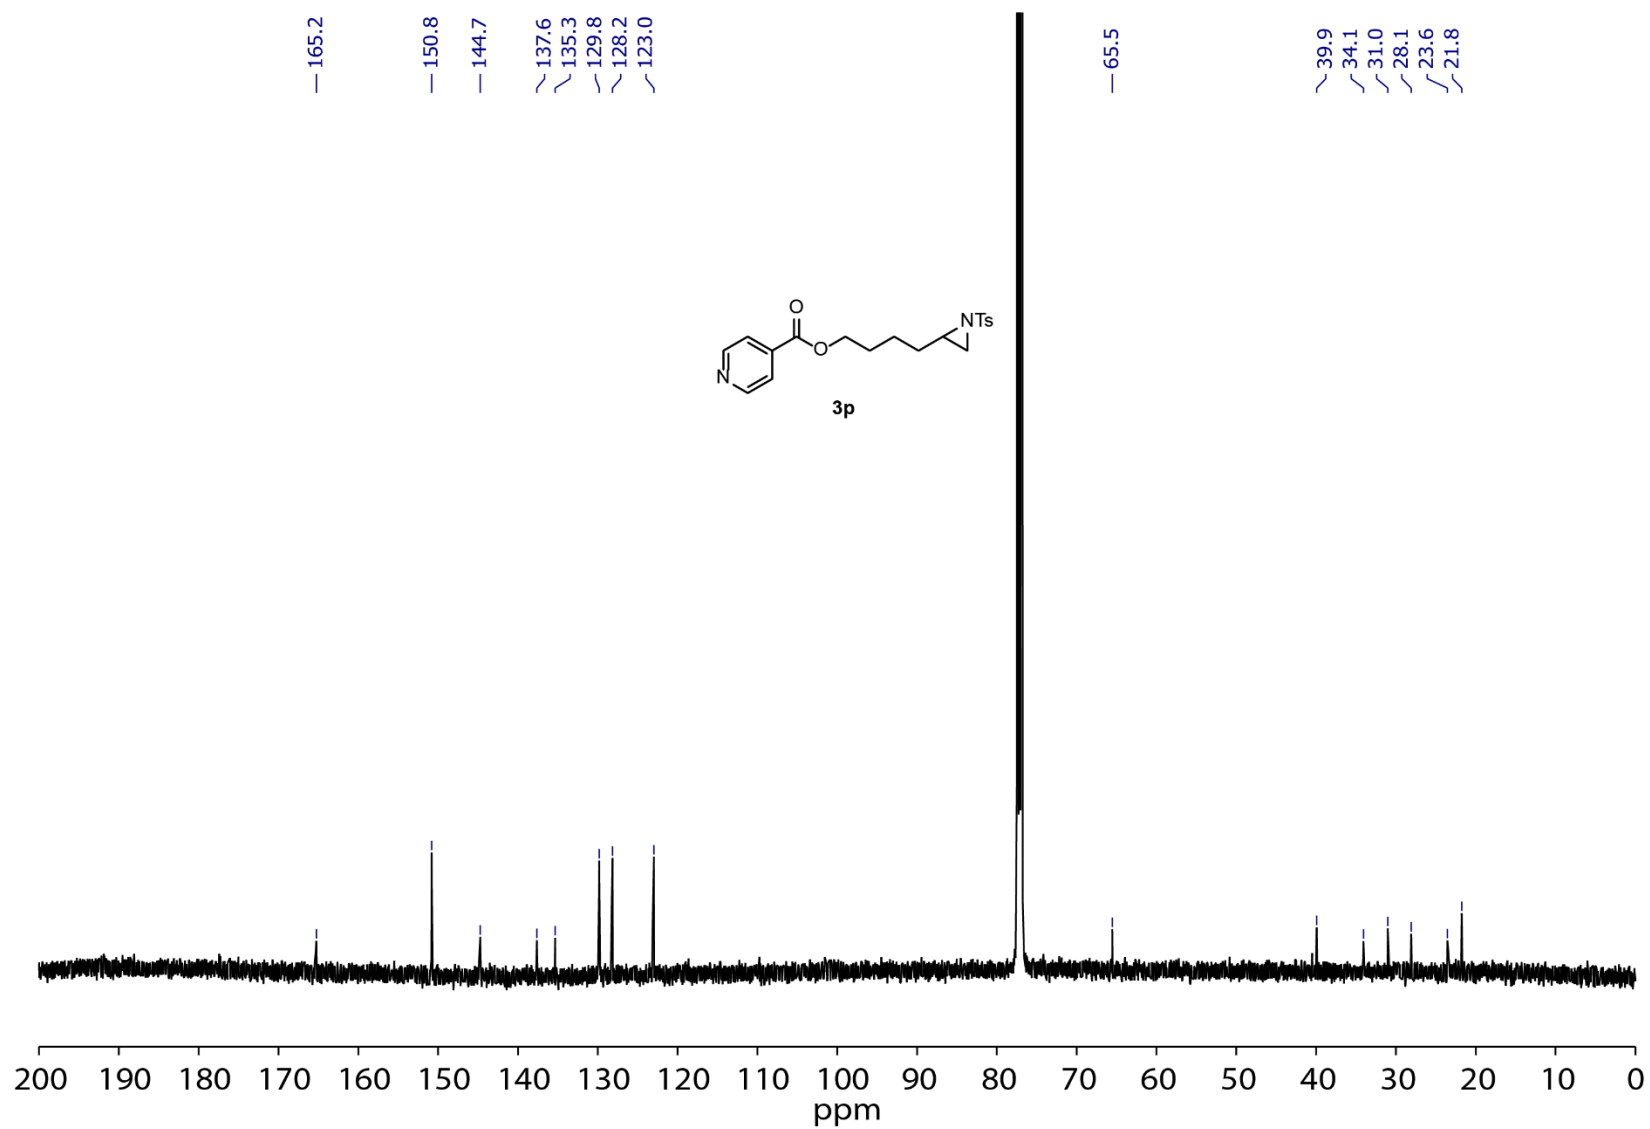

**Figure S18.** <sup>13</sup>C NMR spectrum of 4-(1-tosylaziridin-2-yl)butyl isonicotinate (**3p**) in CDCl<sub>3</sub> (126 MHz) at 23 °C.

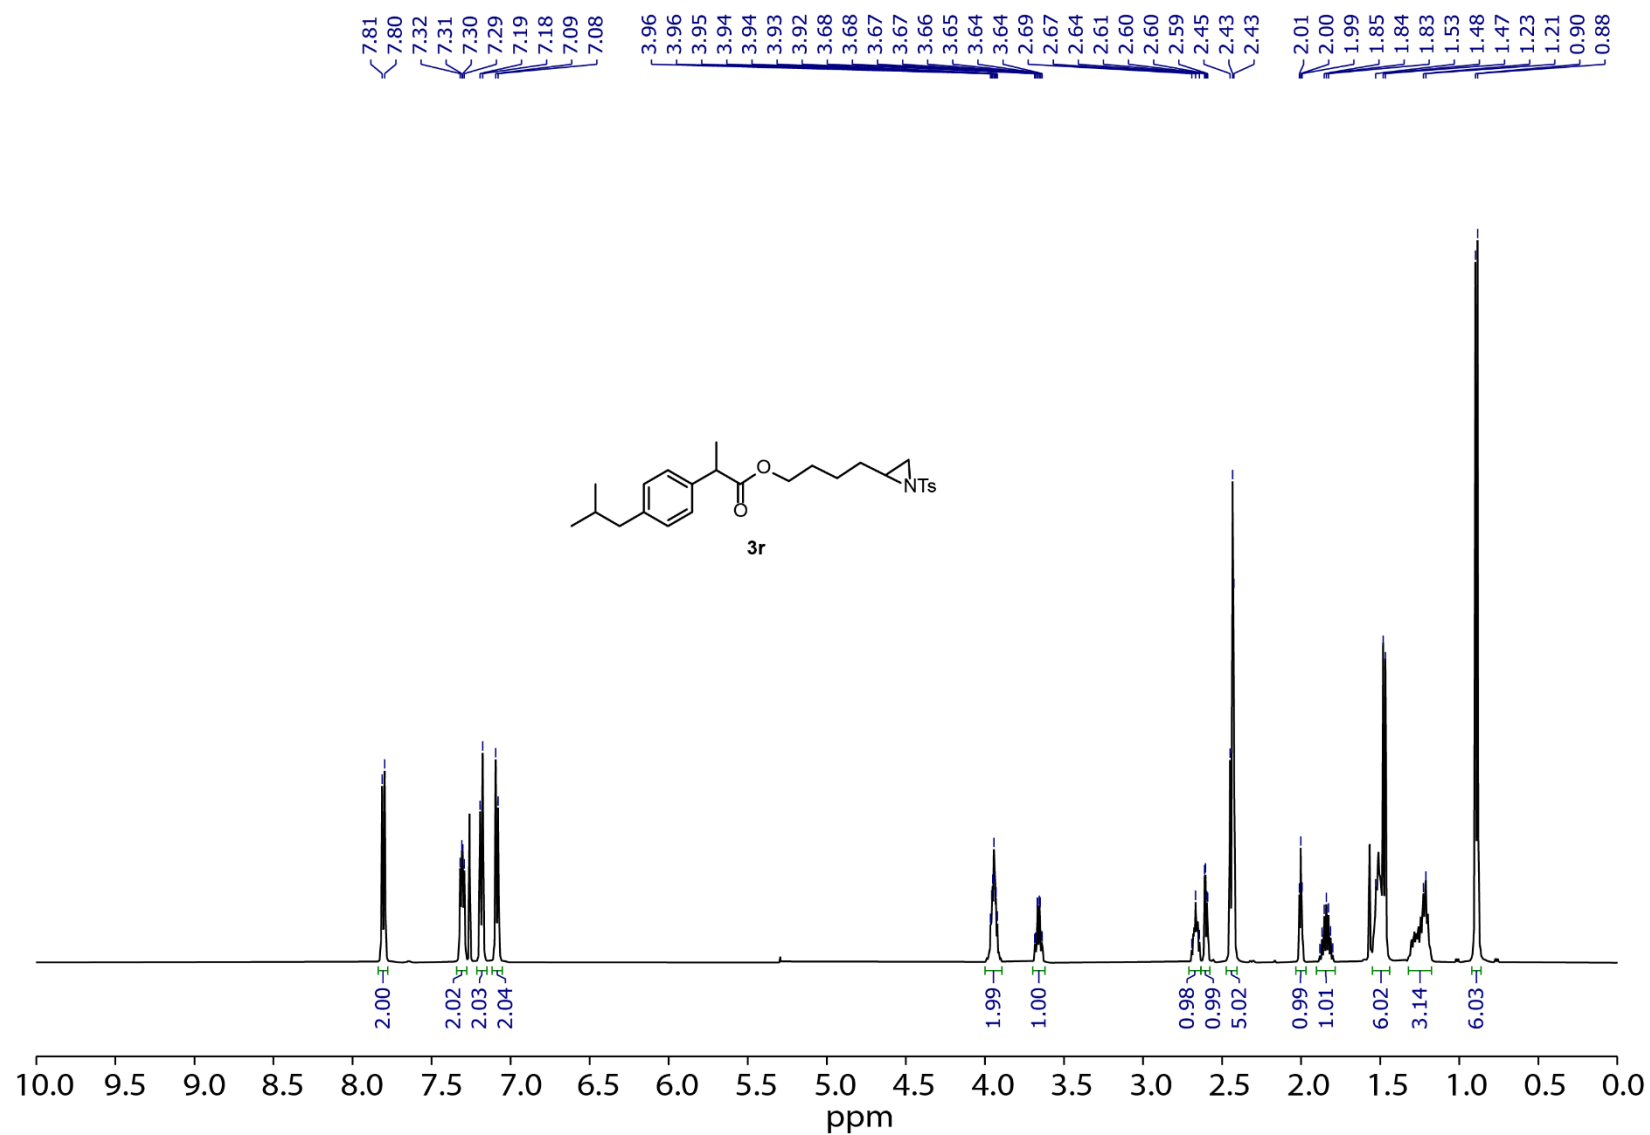

**Figure S19.** <sup>1</sup>H NMR spectrum of 4-(1-tosylaziridin-2-yl)butyl 2-(4-isobutylphenyl)propanoate (**3r**) in CDCl<sub>3</sub> (400 MHz) at 23 °C.

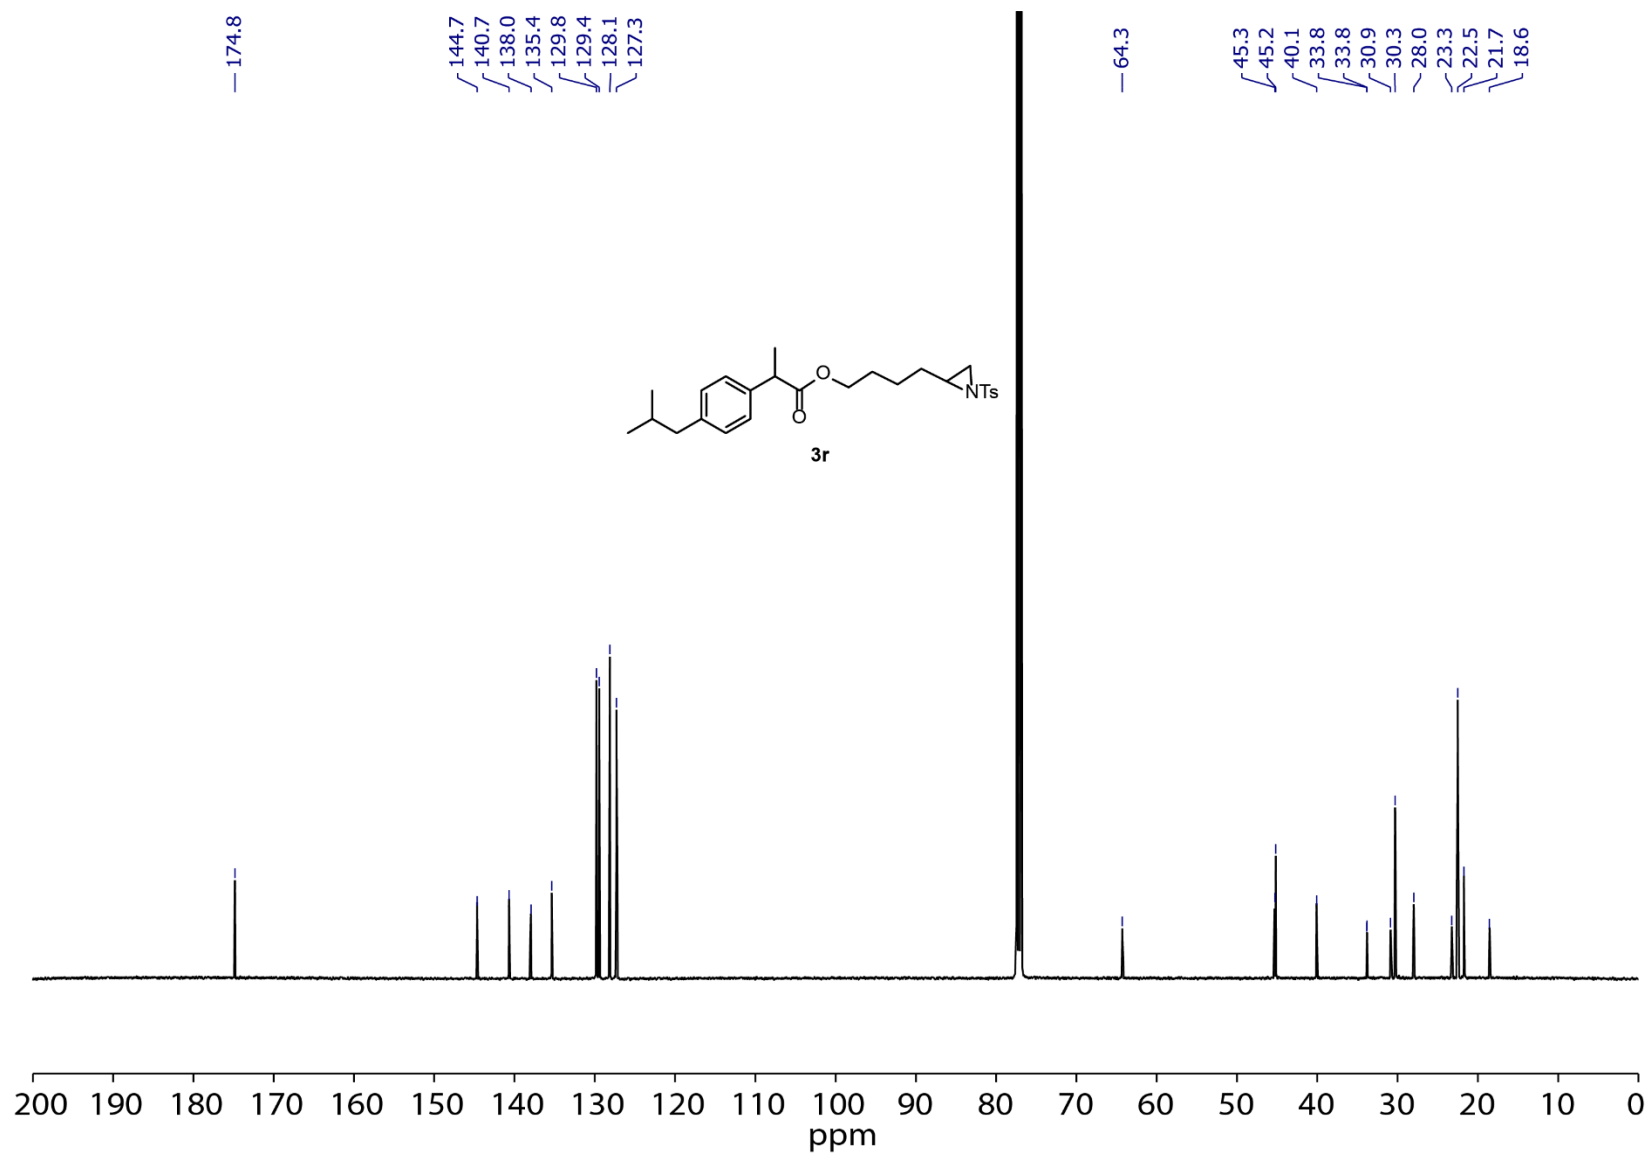

**Figure S20.** <sup>13</sup>C NMR spectrum of 4-(1-tosylaziridin-2-yl)butyl 2-(4-isobutylphenyl)propanoate (**3r**) in CDCl<sub>3</sub> (126 MHz) at 23 °C.

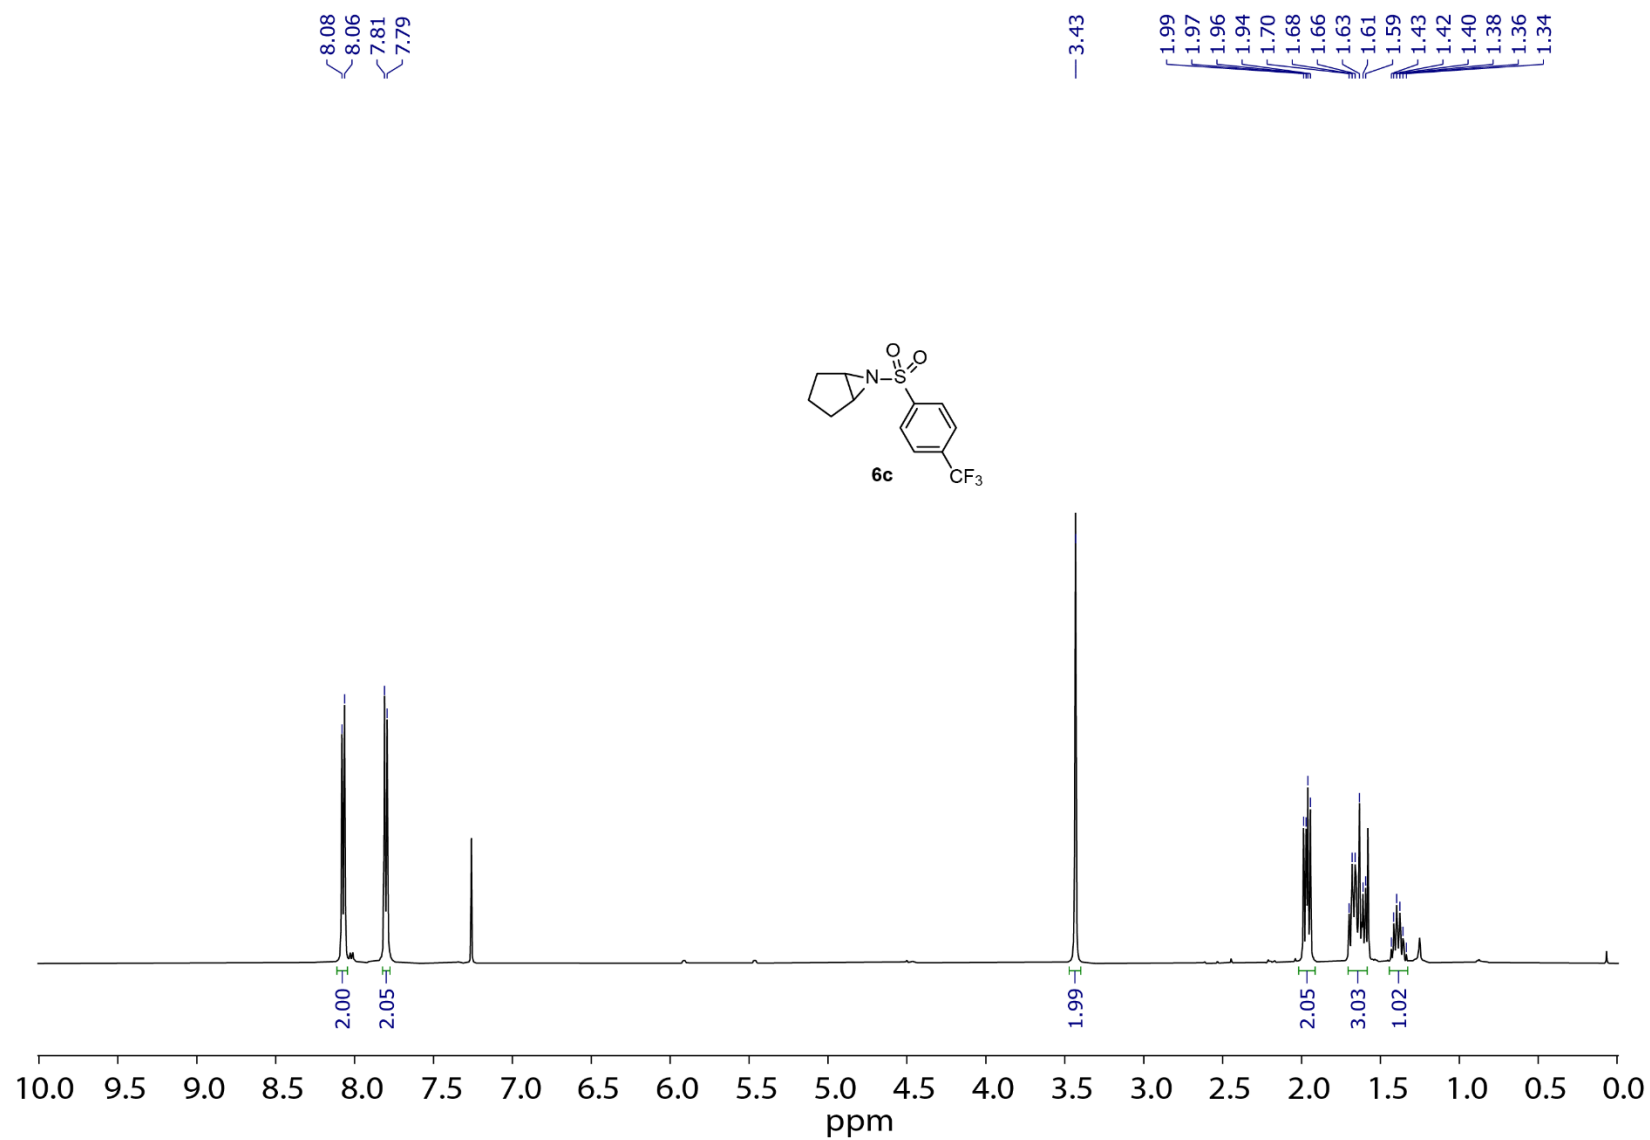

**Figure S21.** <sup>1</sup>H NMR spectrum of 6-((4-(trifluoromethyl)phenyl)sulfonyl)-6-azabicyclo[3.1.0]hexane (**6c**) in CDCl<sub>3</sub> (400 MHz) at 23 °C.

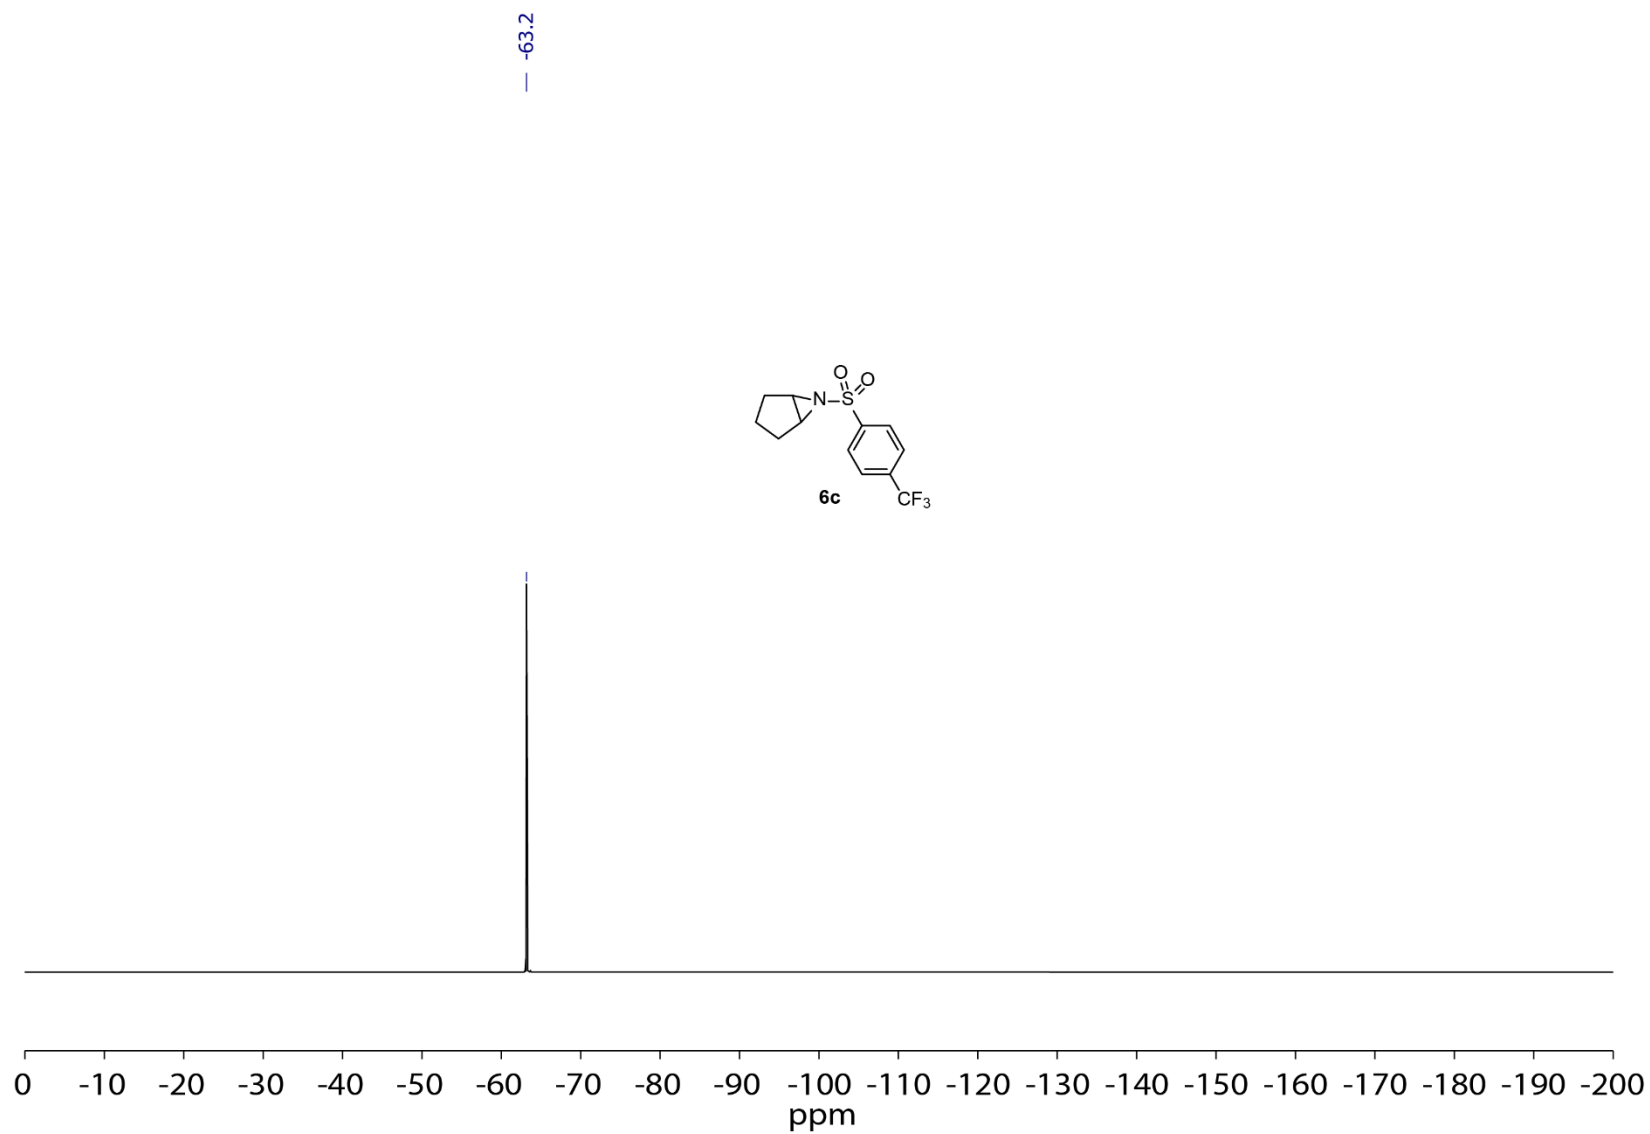

**Figure S22.** <sup>19</sup>F NMR spectrum of 6-((4-(trifluoromethyl)phenyl)sulfonyl)-6-azabicyclo[3.1.0]hexane (**6c**) in CDCl<sub>3</sub> (377 MHz) at 23 °C.

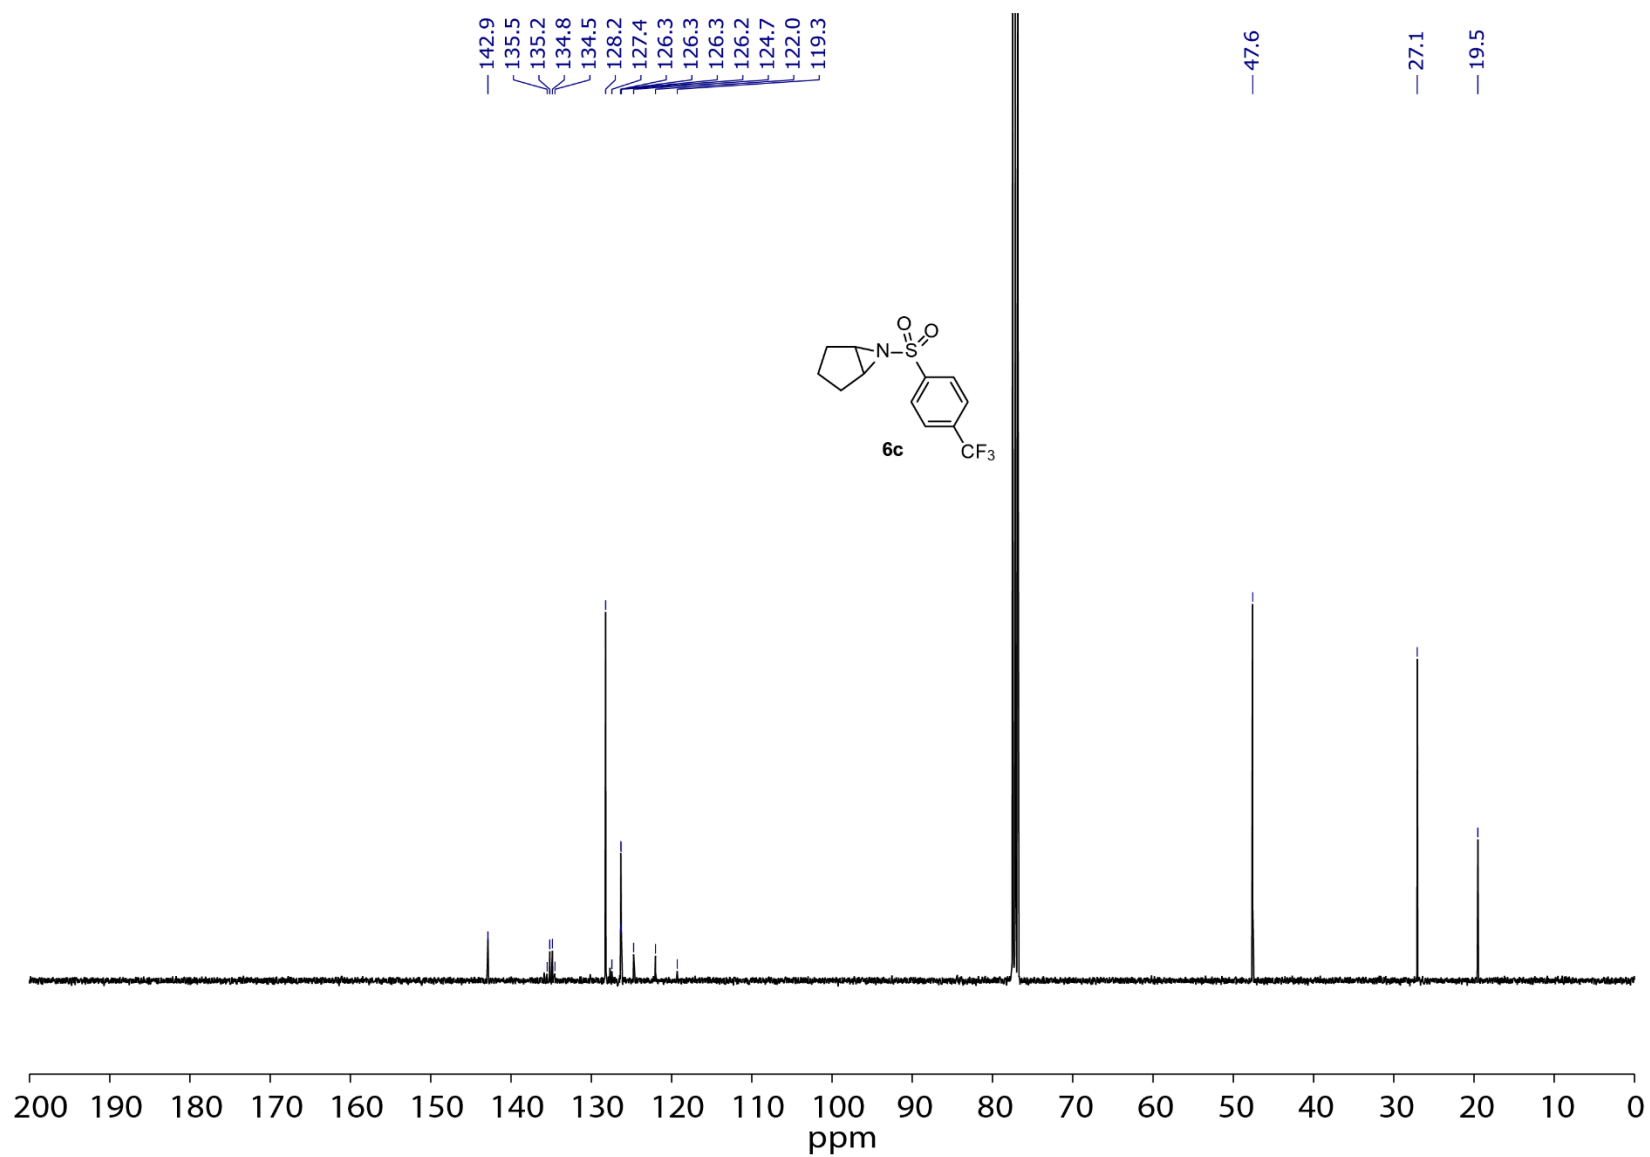

**Figure S23.** <sup>13</sup>C NMR spectrum of 6-((4-(trifluoromethyl)phenyl)sulfonyl)-6-azabicyclo[3.1.0]hexane (**6c**) in CDCl<sub>3</sub> (126 MHz) at 23 °C.

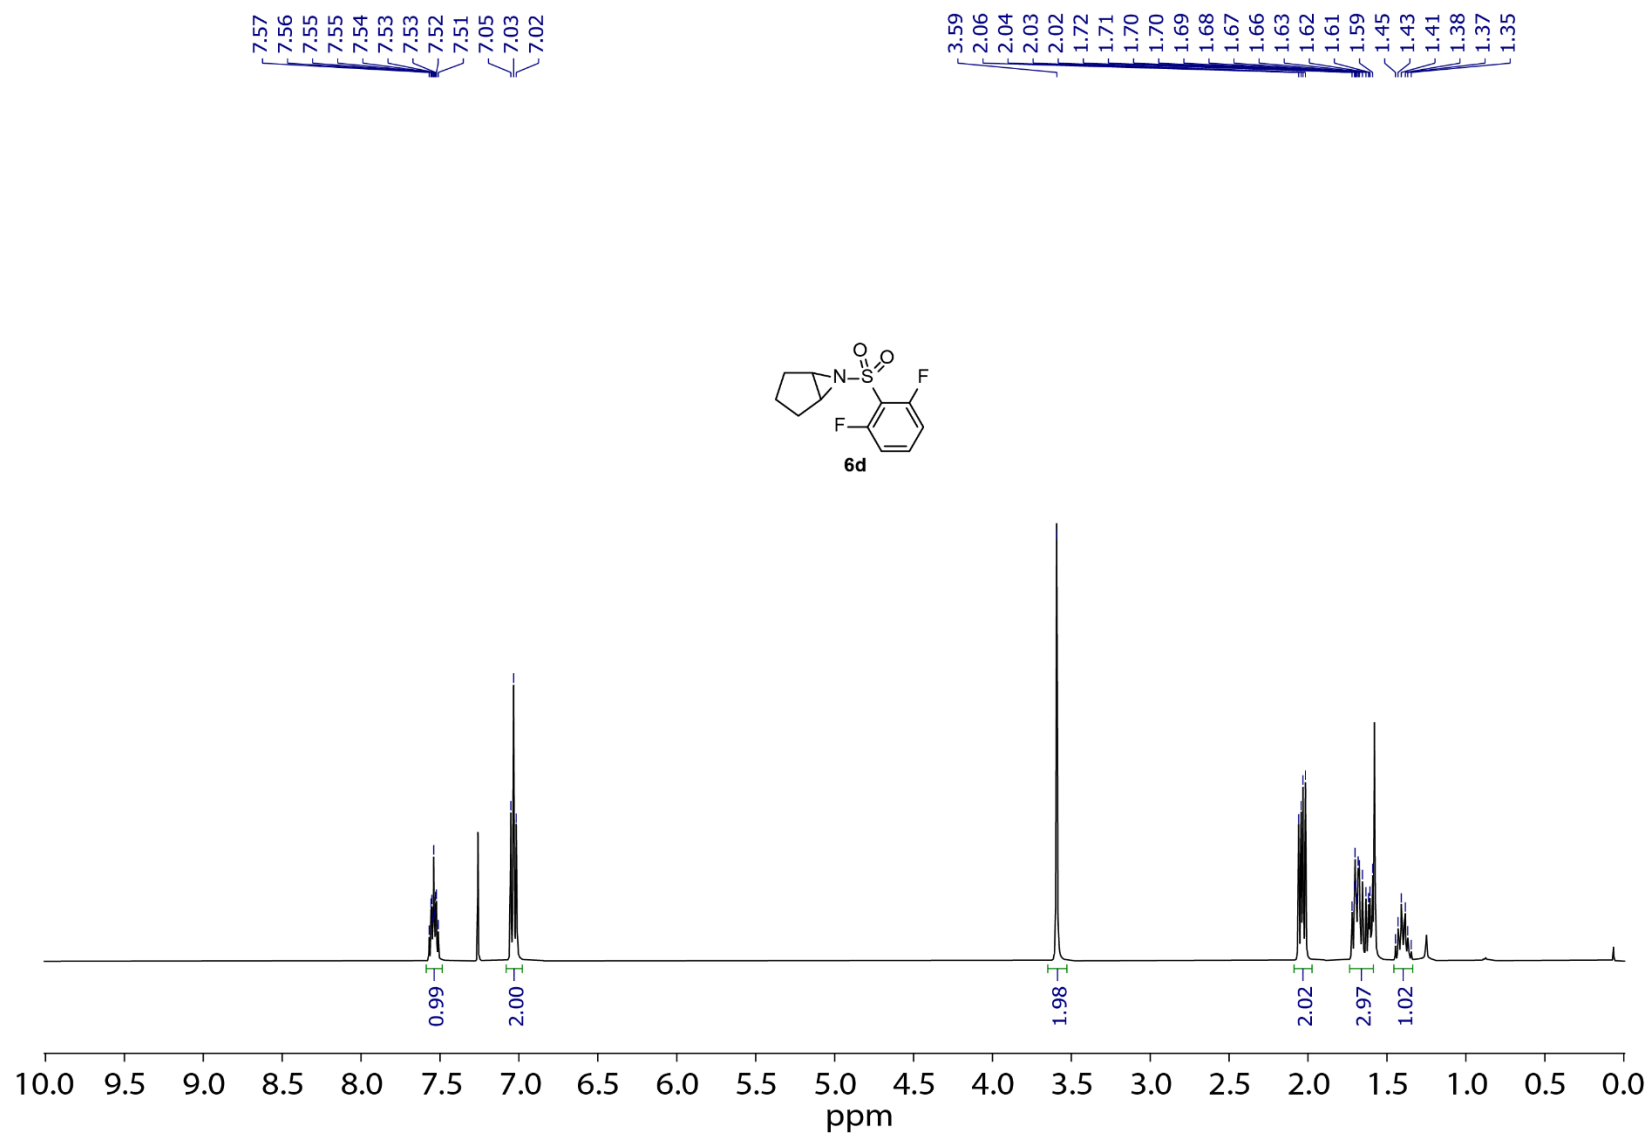

**Figure S24.** <sup>1</sup>H NMR spectrum of 6-((2,6-difluorophenyl)sulfonyl)-6-azabicyclo[3.1.0]hexane (**6d**) in CDCl<sub>3</sub> (400 MHz) at 23 °C.

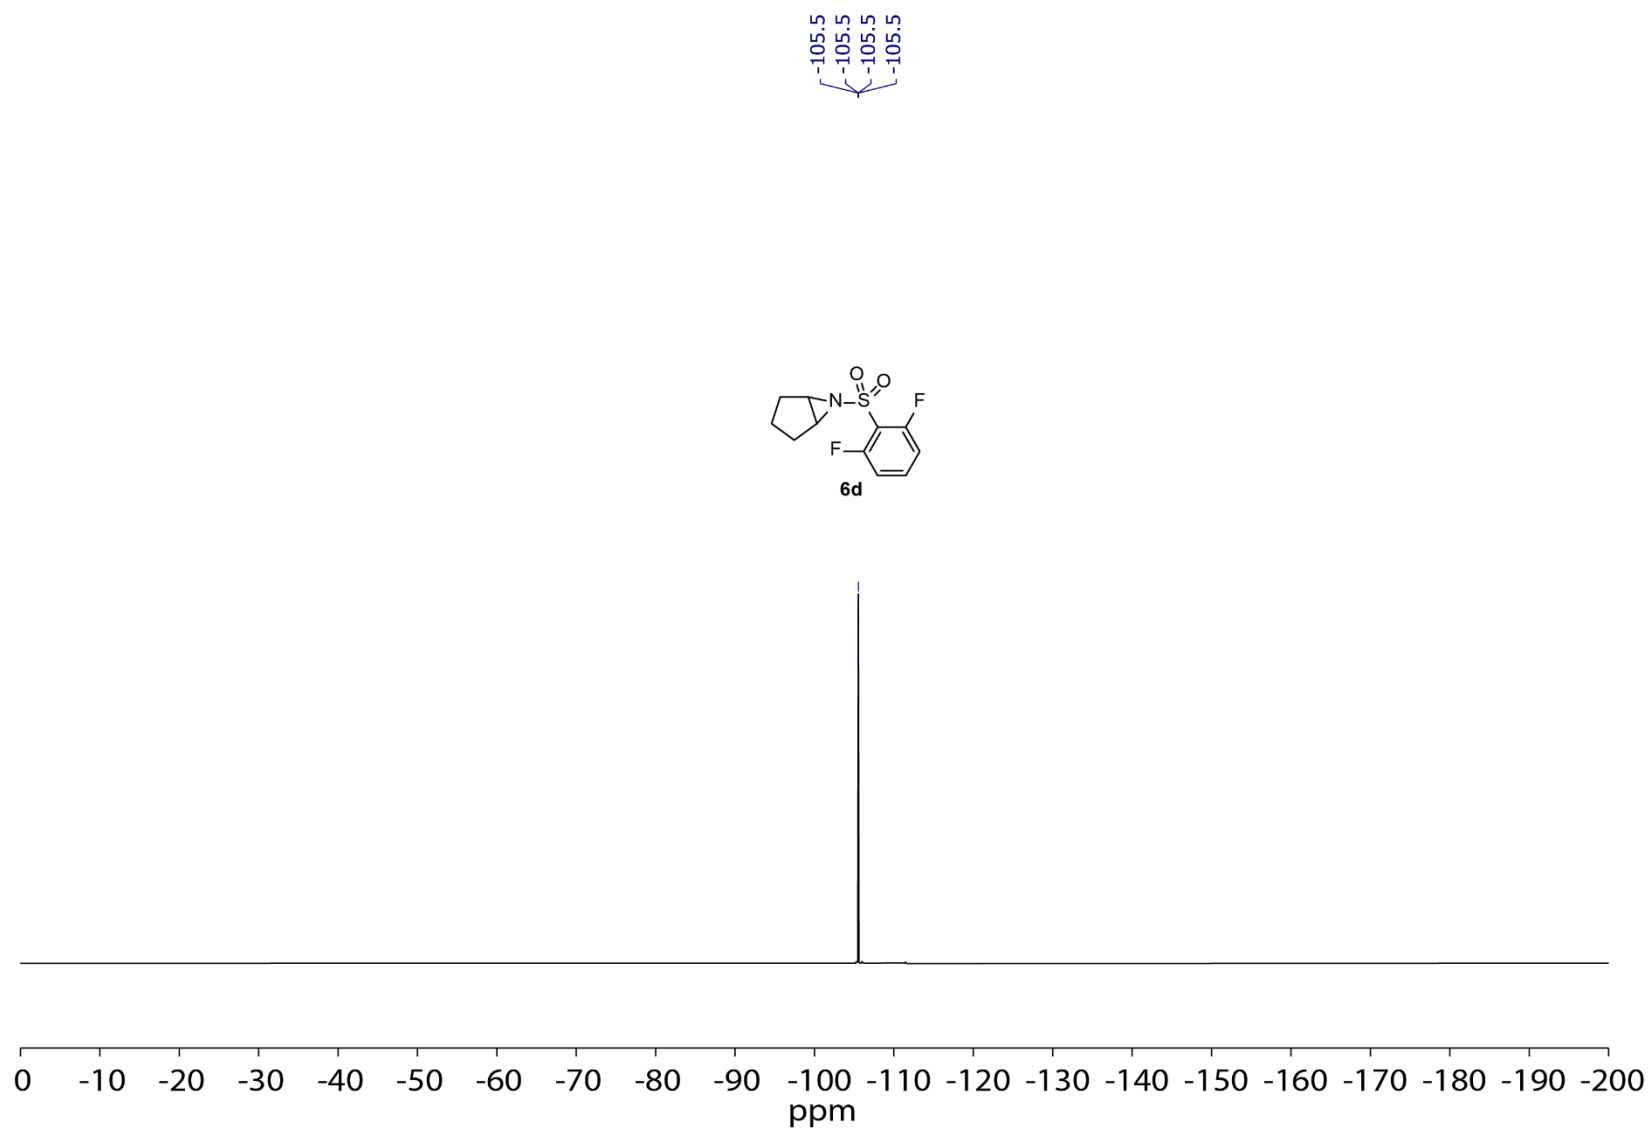

**Figure S25.**  $^{19}\text{F}$  NMR spectrum of 6-((2,6-difluorophenyl)sulfonyl)-6-azabicyclo[3.1.0]hexane (**6d**) in  $\text{CDCl}_3$  (377 MHz) at 23 °C.



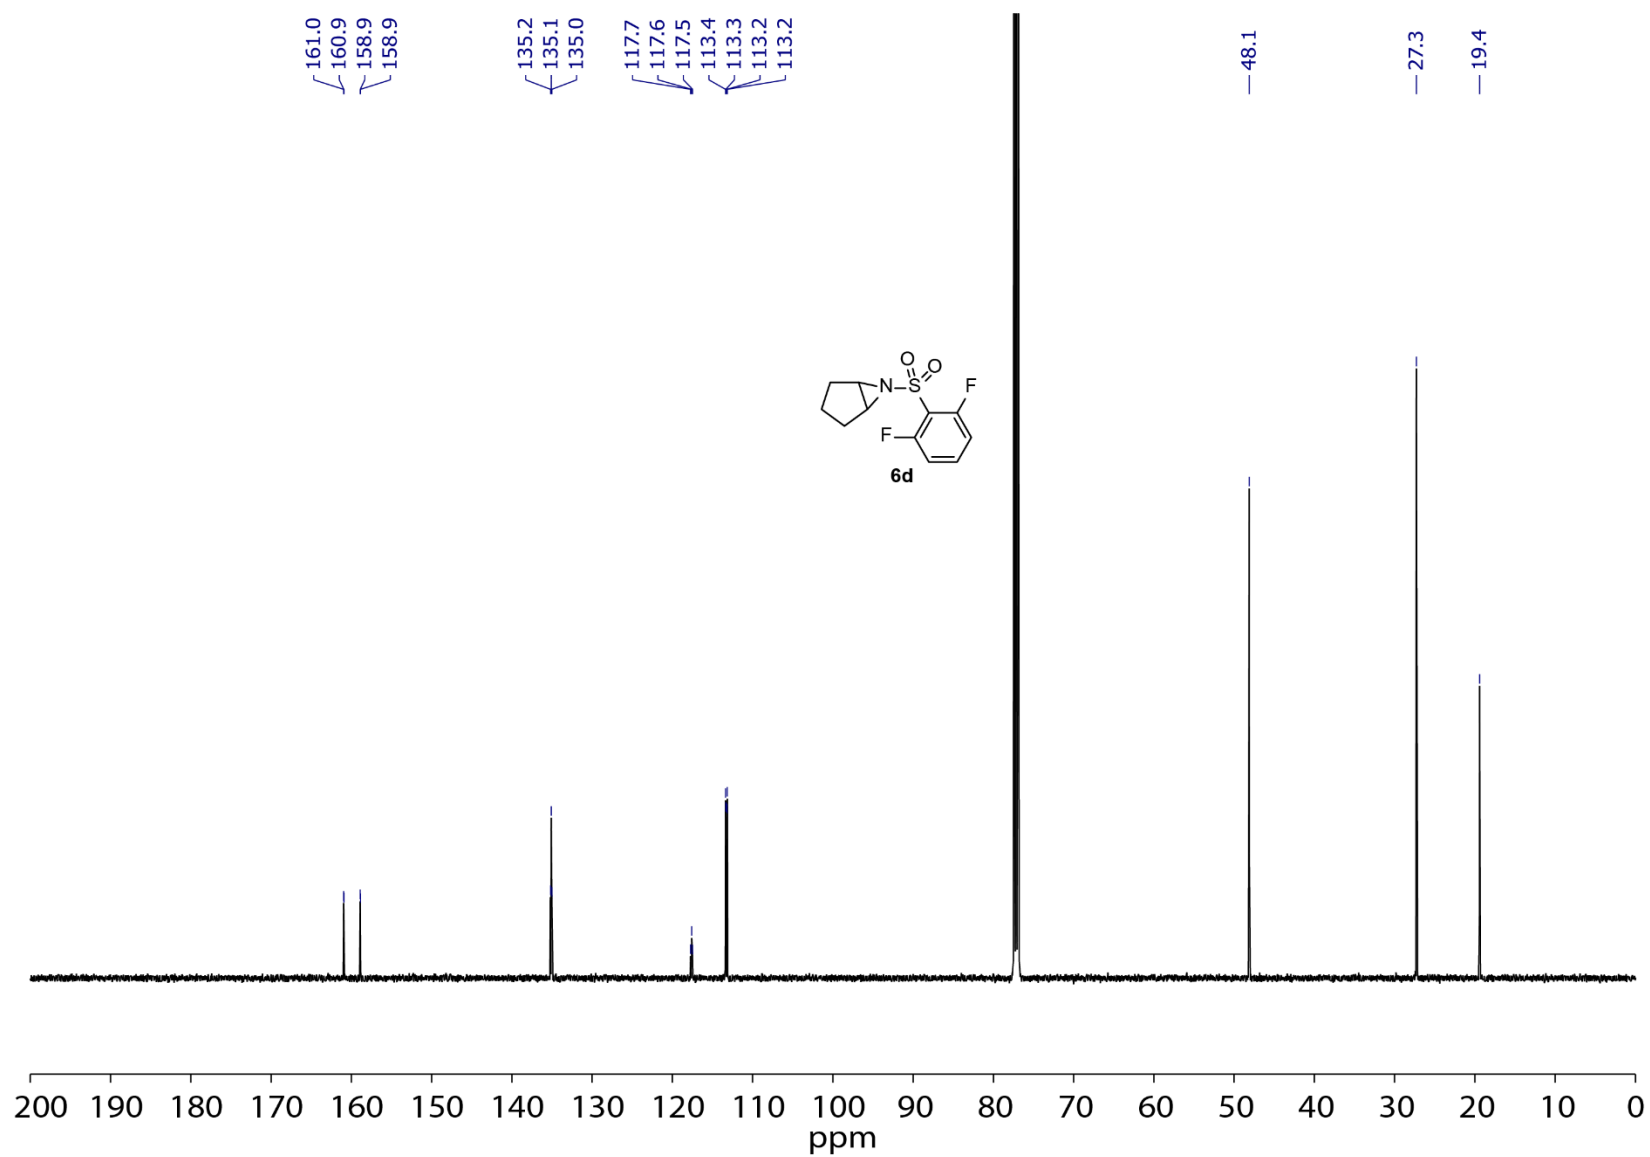

**Figure S26.** <sup>13</sup>C NMR spectrum of 6-((2,6-difluorophenyl)sulfonyl)-6-azabicyclo[3.1.0]hexane (**6d**) in CDCl<sub>3</sub> (126 MHz) at 23 °C.

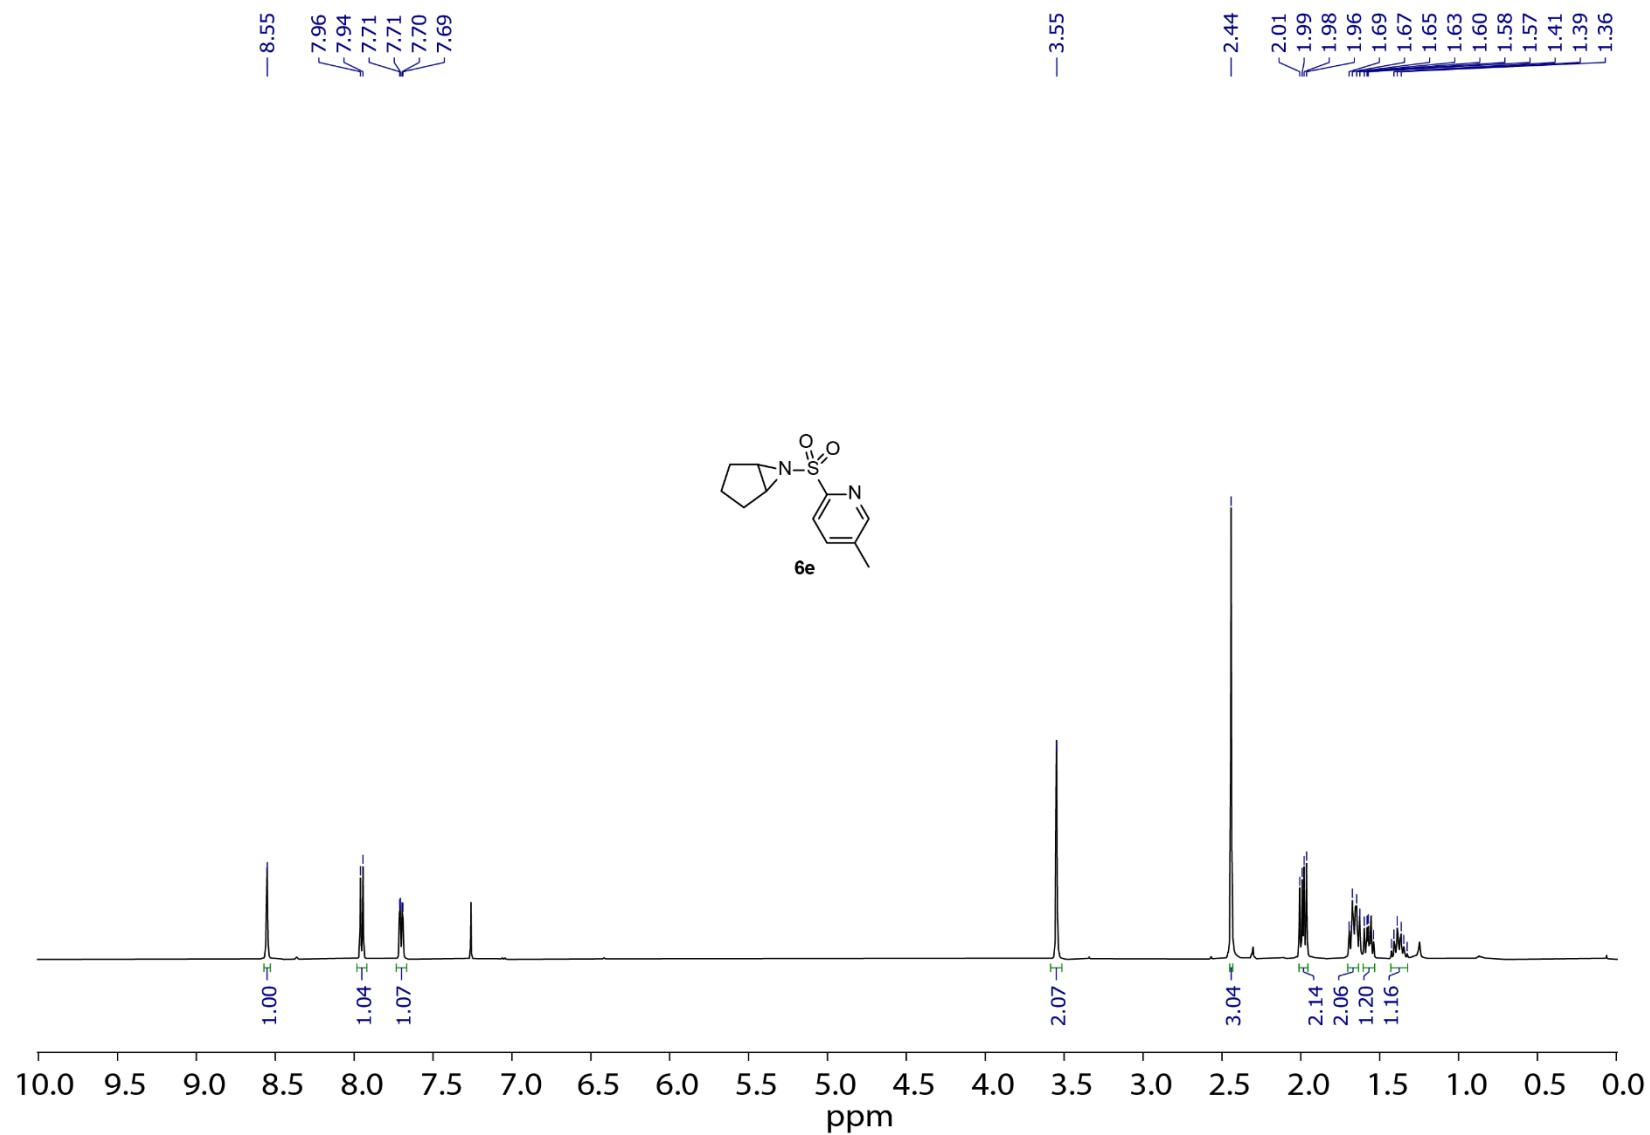

**Figure S27.** <sup>1</sup>H NMR spectrum of 6-((5-methylpyridin-2-yl)sulfonyl)-6-azabicyclo[3.1.0]hexane (**6e**) in CDCl<sub>3</sub> (400 MHz) at 23 °C.

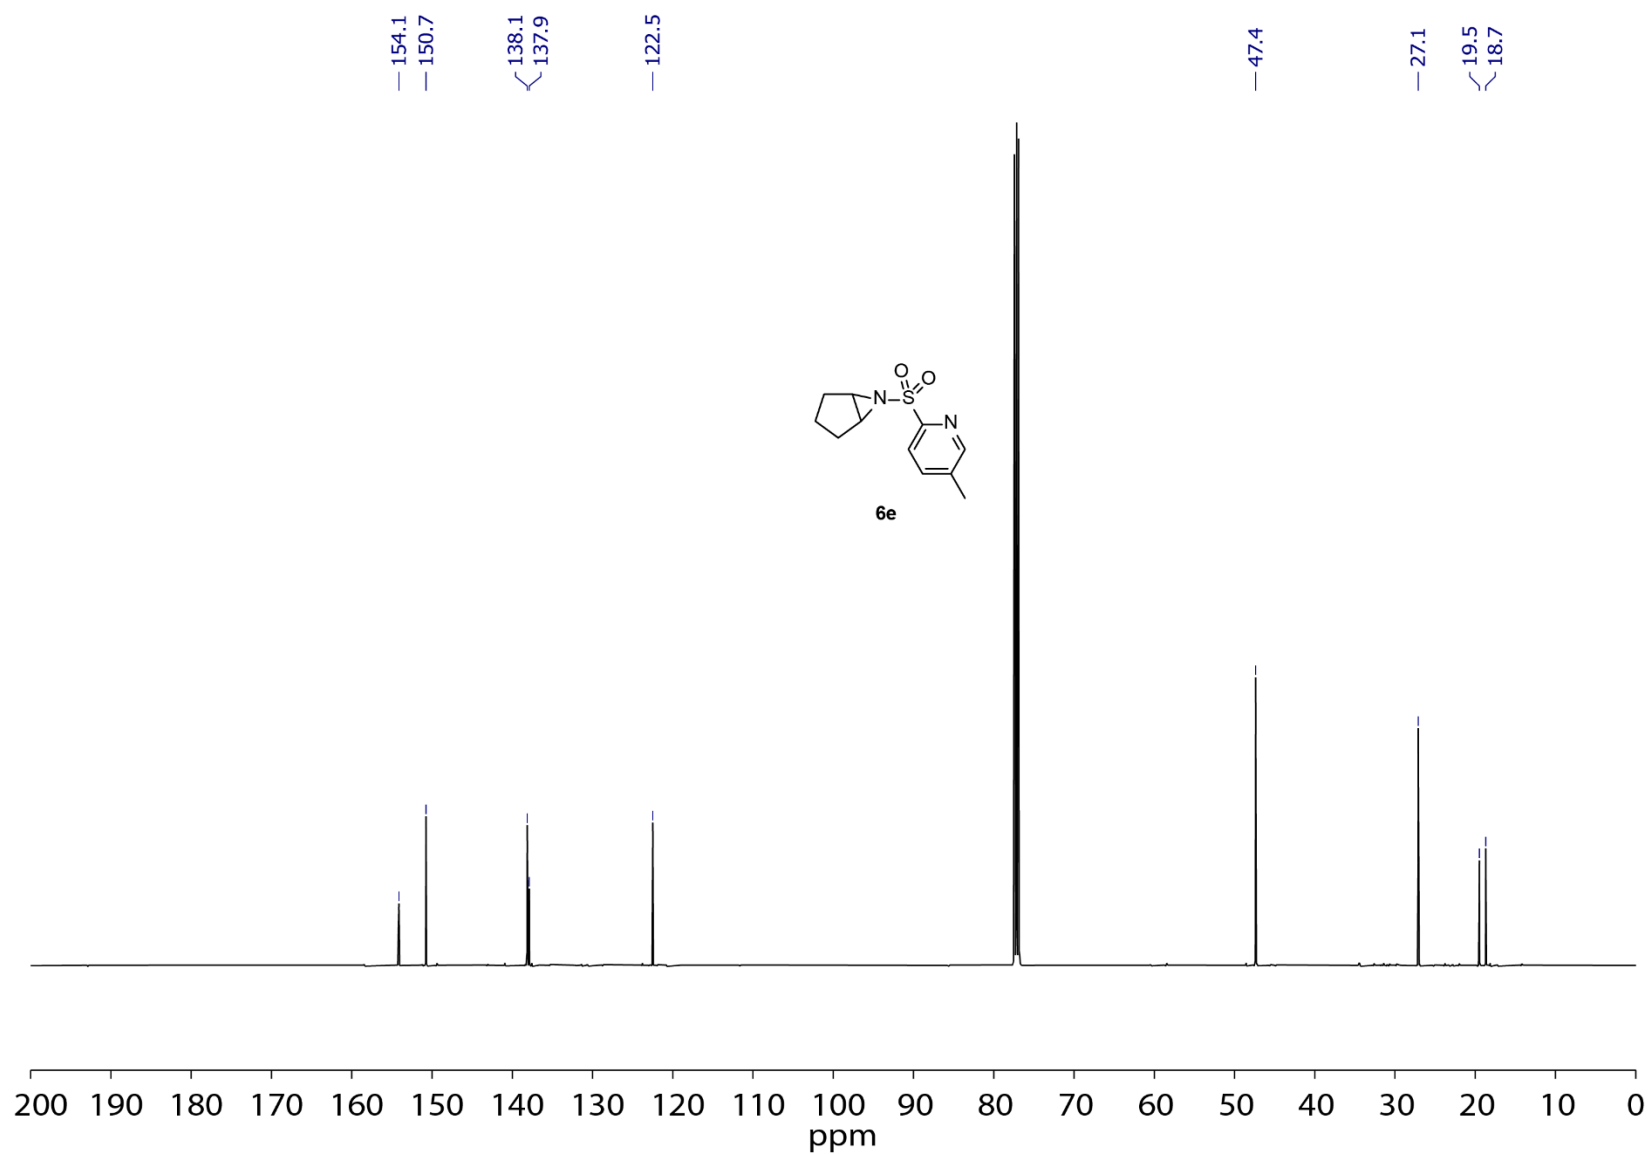

**Figure S28.**  $^{13}\text{C}$  NMR spectrum of 6-((5-methylpyridin-2-yl)sulfonyl)-6-azabicyclo[3.1.0]hexane (**6e**) in  $\text{CDCl}_3$  (126 MHz) at 23  $^\circ\text{C}$ .

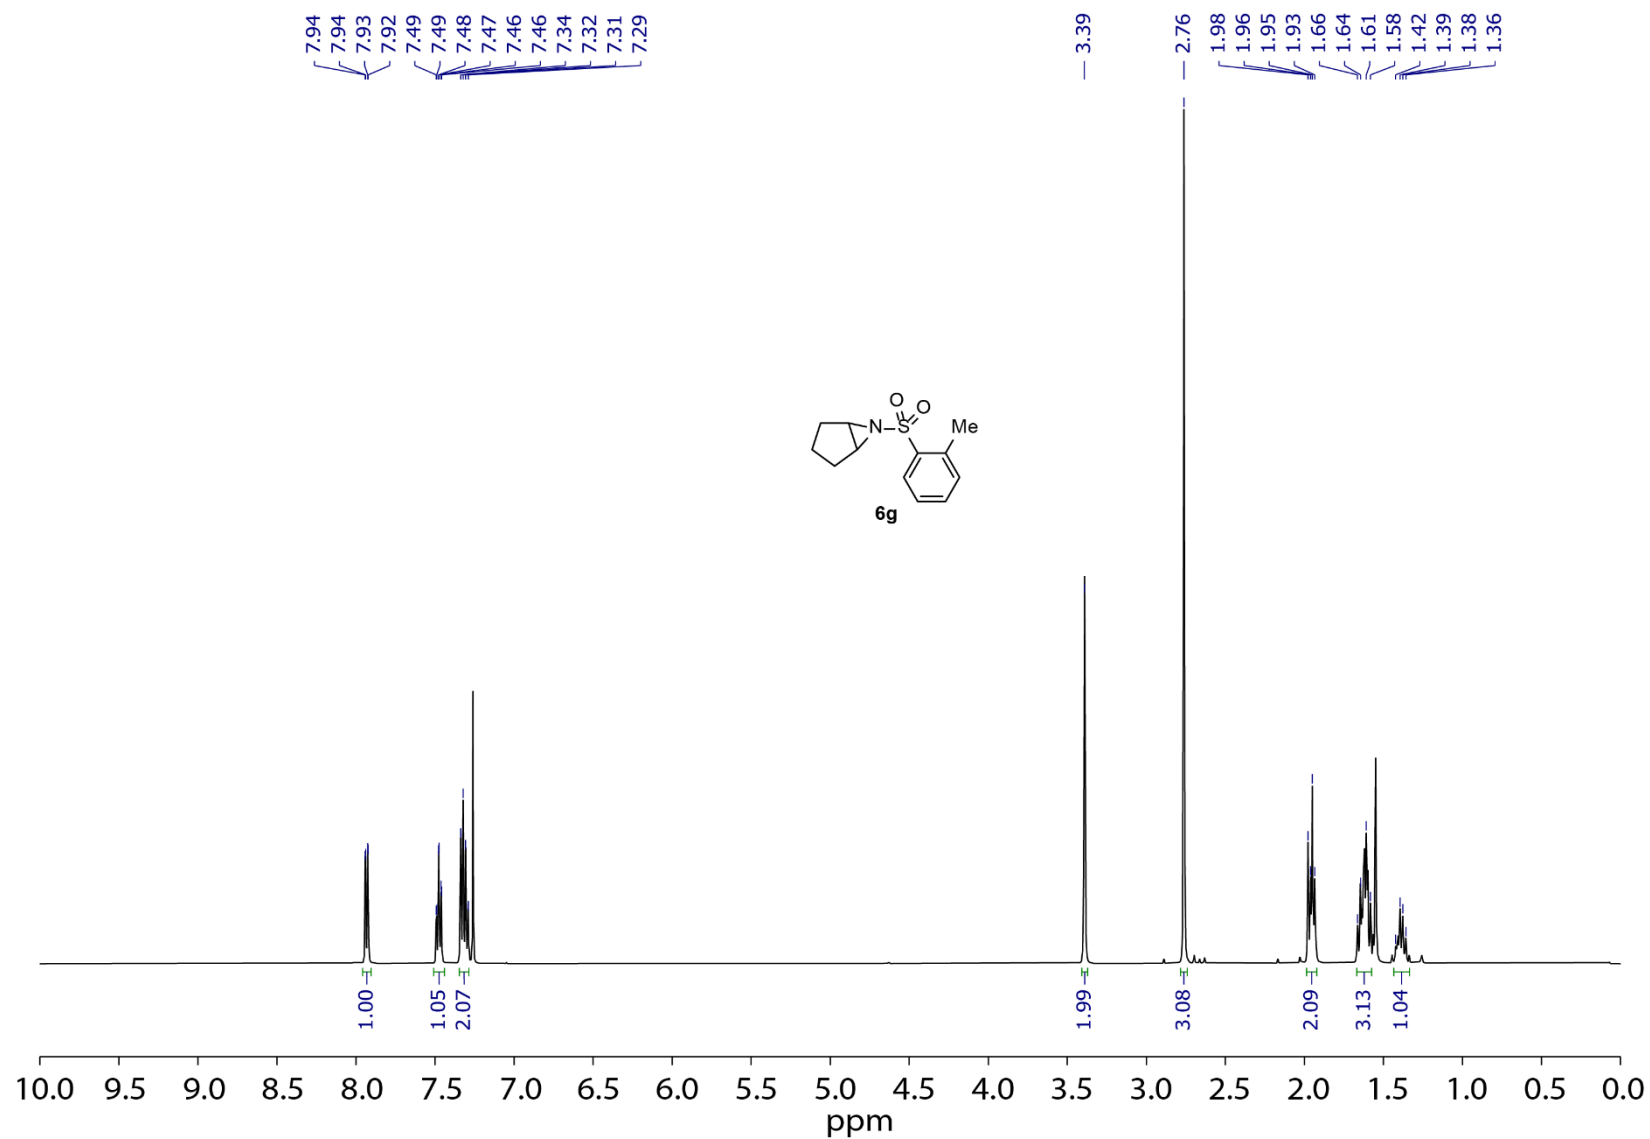

**Figure S29.** <sup>1</sup>H NMR spectrum of 6-(*o*-tolylsulfonyl)-6-azabicyclo[3.1.0]hexane (**6g**) in CDCl<sub>3</sub> (400 MHz) at 23 °C.

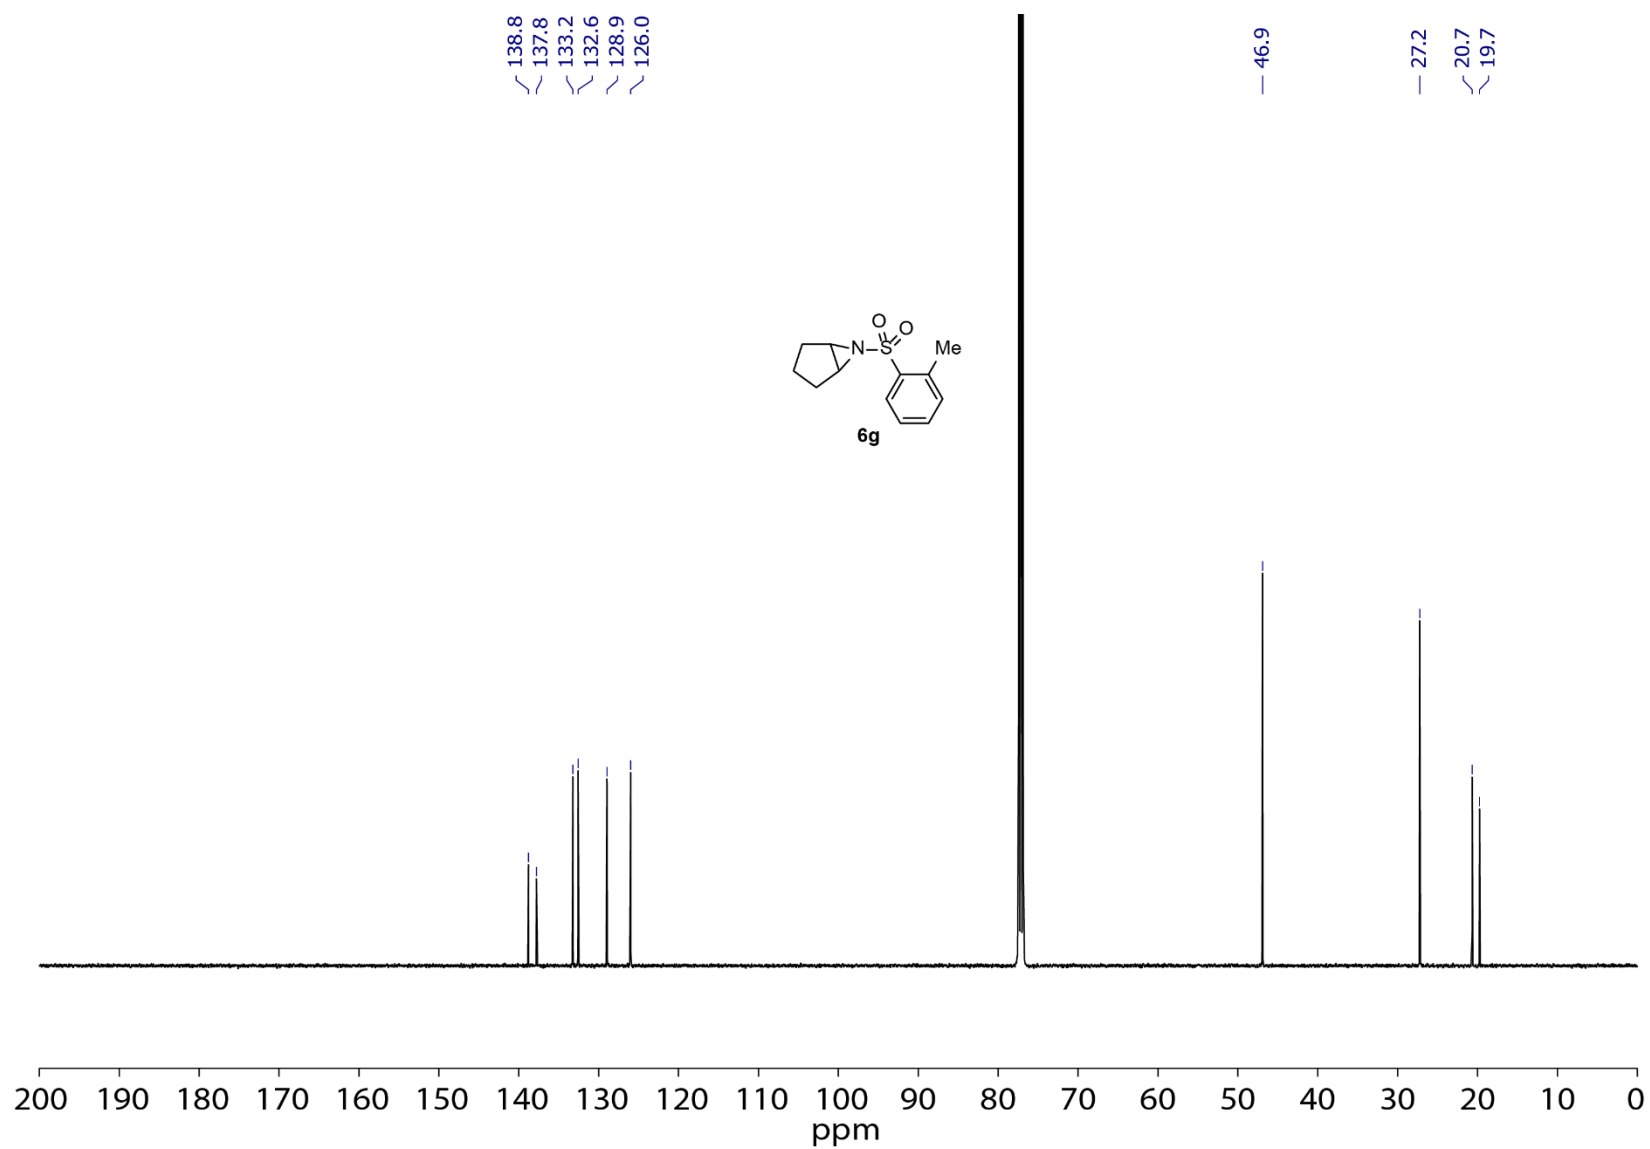

**Figure S30.**  $^{13}\text{C}$  NMR spectrum of 6-(*o*-tolylsulfonyl)-6-azabicyclo[3.1.0]hexane (**6g**) in  $\text{CDCl}_3$  (126 MHz) at 23 °C.

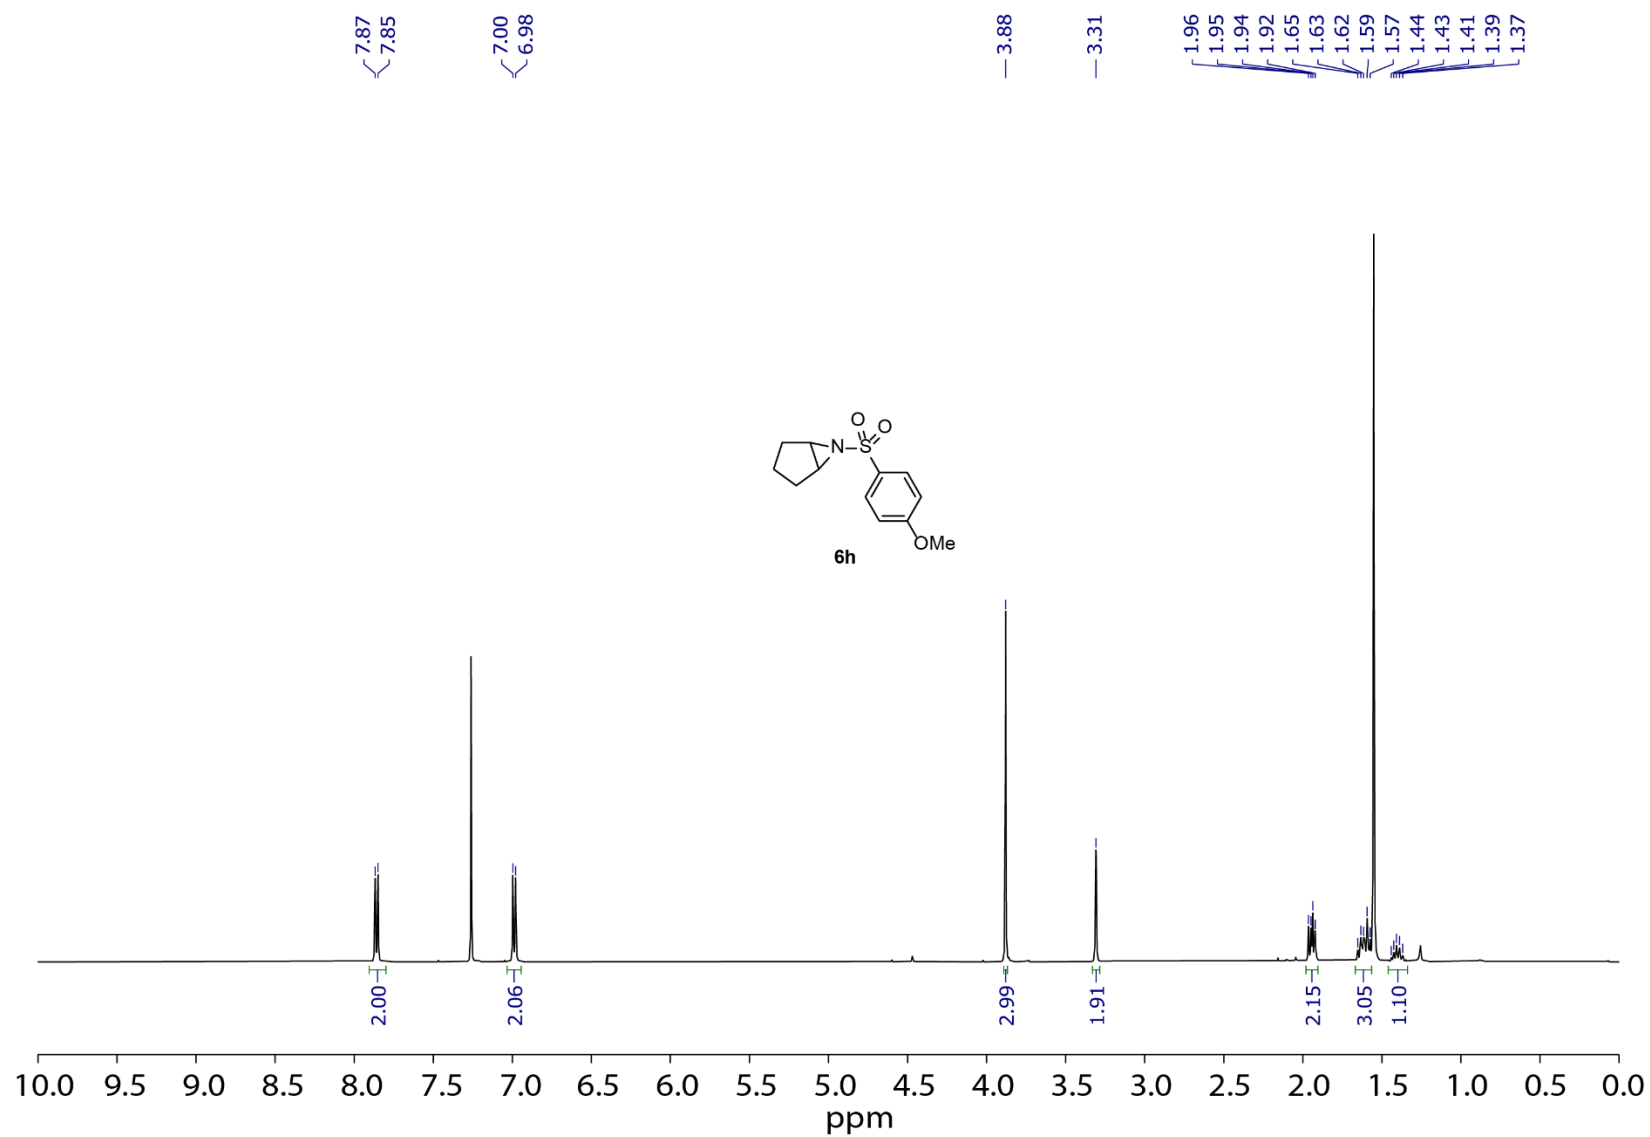

**Figure S31.** <sup>1</sup>H NMR spectrum of 6-((4-methoxyphenyl)sulfonyl)-6-azabicyclo[3.1.0]hexane (**6h**) in CDCl<sub>3</sub> (400 MHz) at 23 °C.

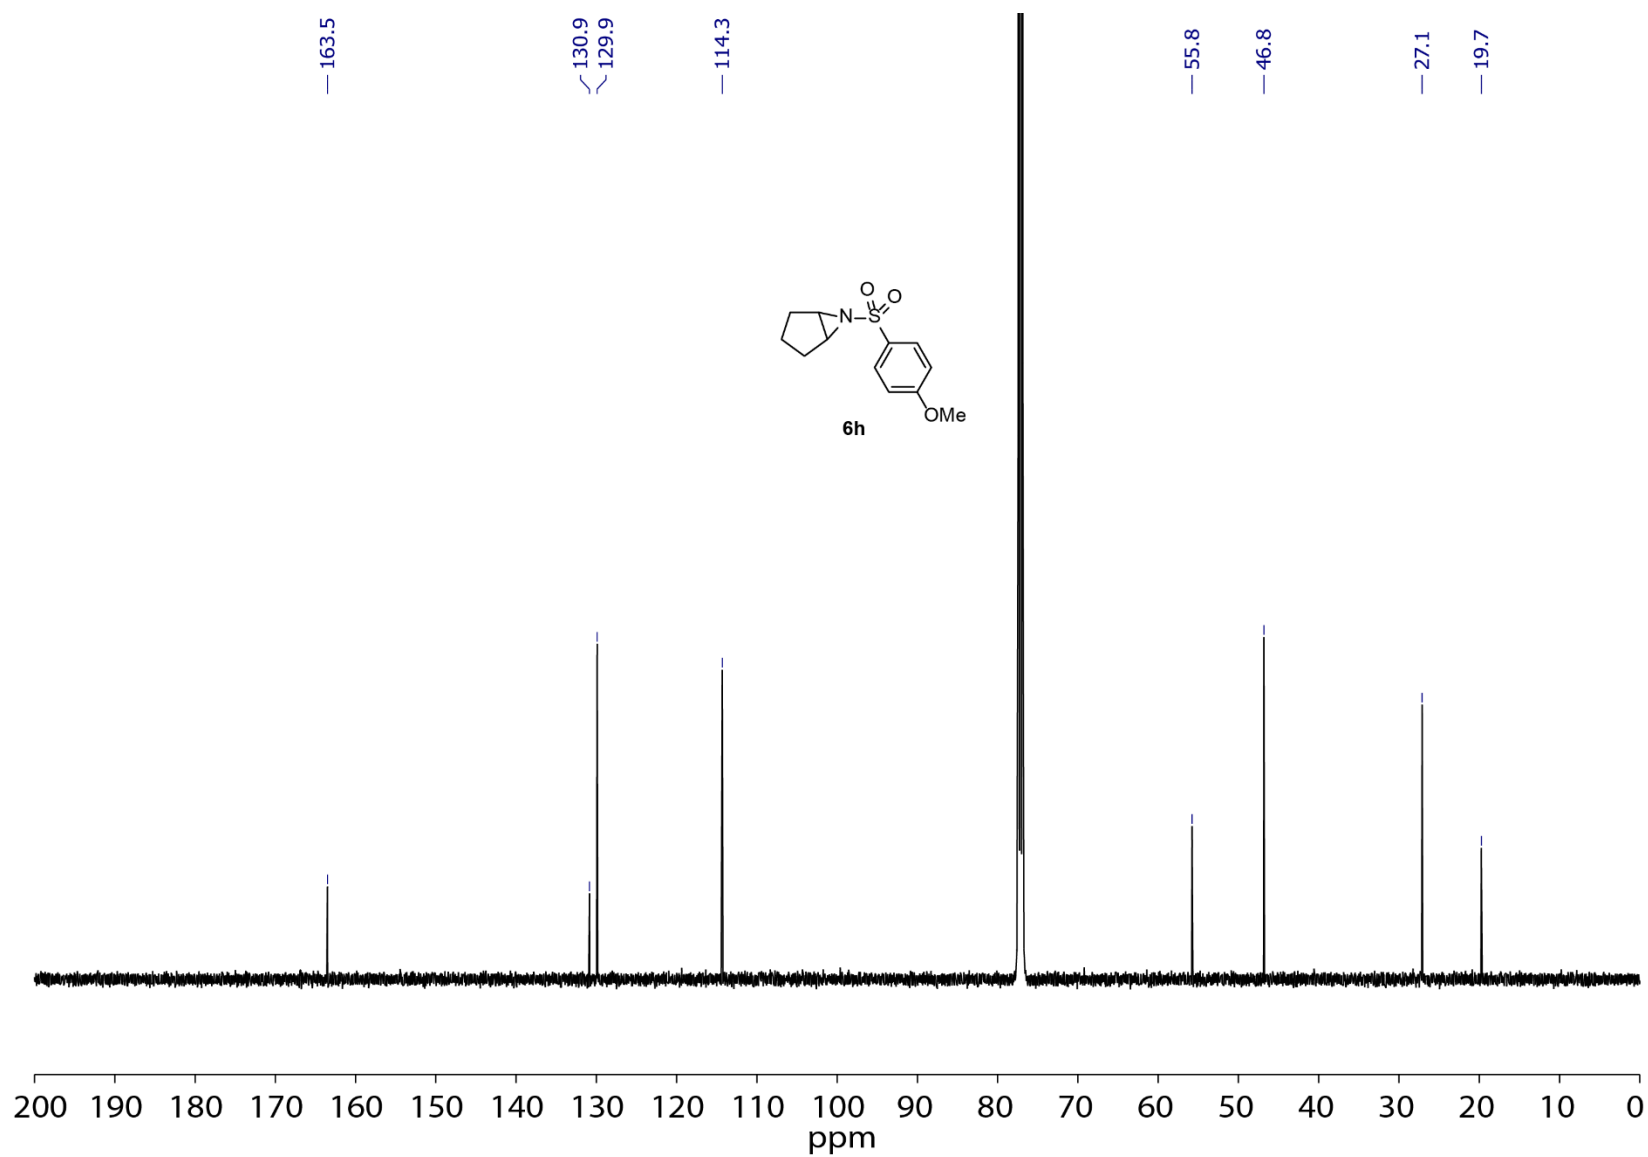

**Figure S32.**  $^{13}\text{C}$  NMR spectrum of 6-((4-methoxyphenyl)sulfonyl)-6-azabicyclo[3.1.0]hexane (**6h**) in  $\text{CDCl}_3$  (126 MHz) at 23 °C.

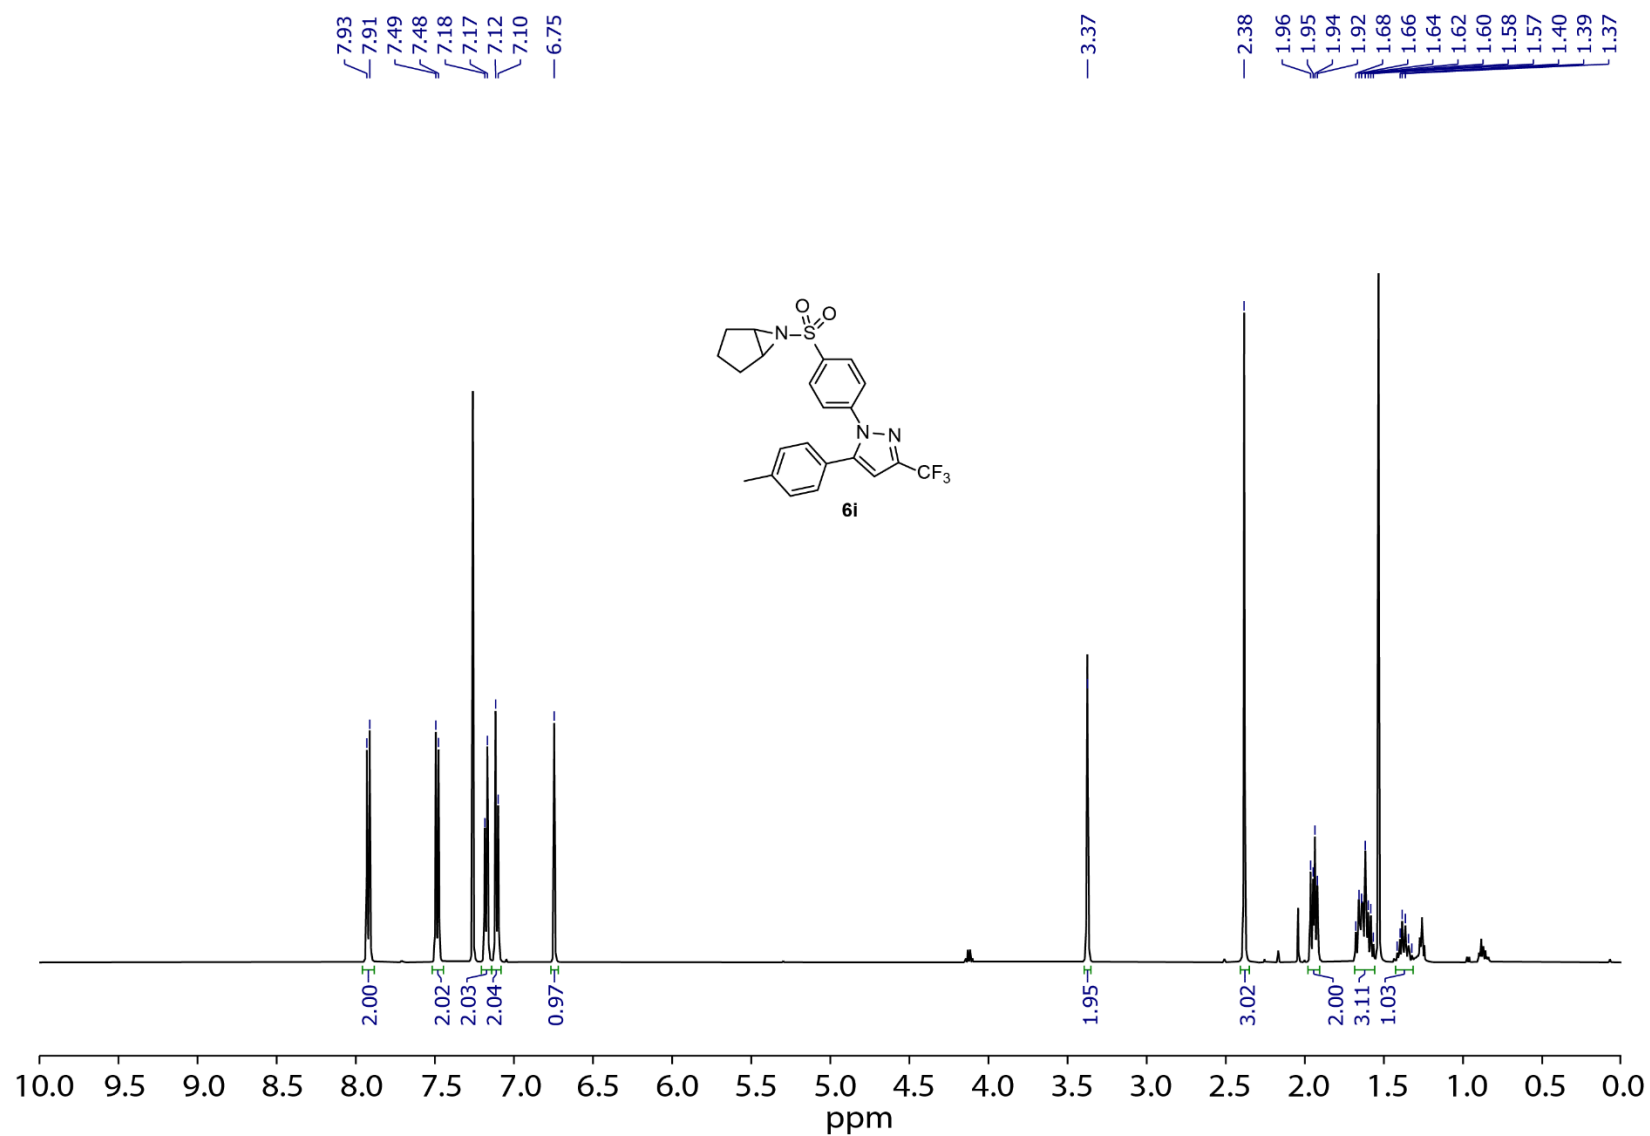

**Figure S33.** <sup>1</sup>H NMR spectrum of 6-((4-(5-(*p*-tolyl)-3-(trifluoromethyl)-1*H*-pyrazol-1-yl)phenyl)sulfonyl)-6-azabicyclo[3.1.0]hexane (**6i**) in CDCl<sub>3</sub> (400 MHz) at 23 °C.



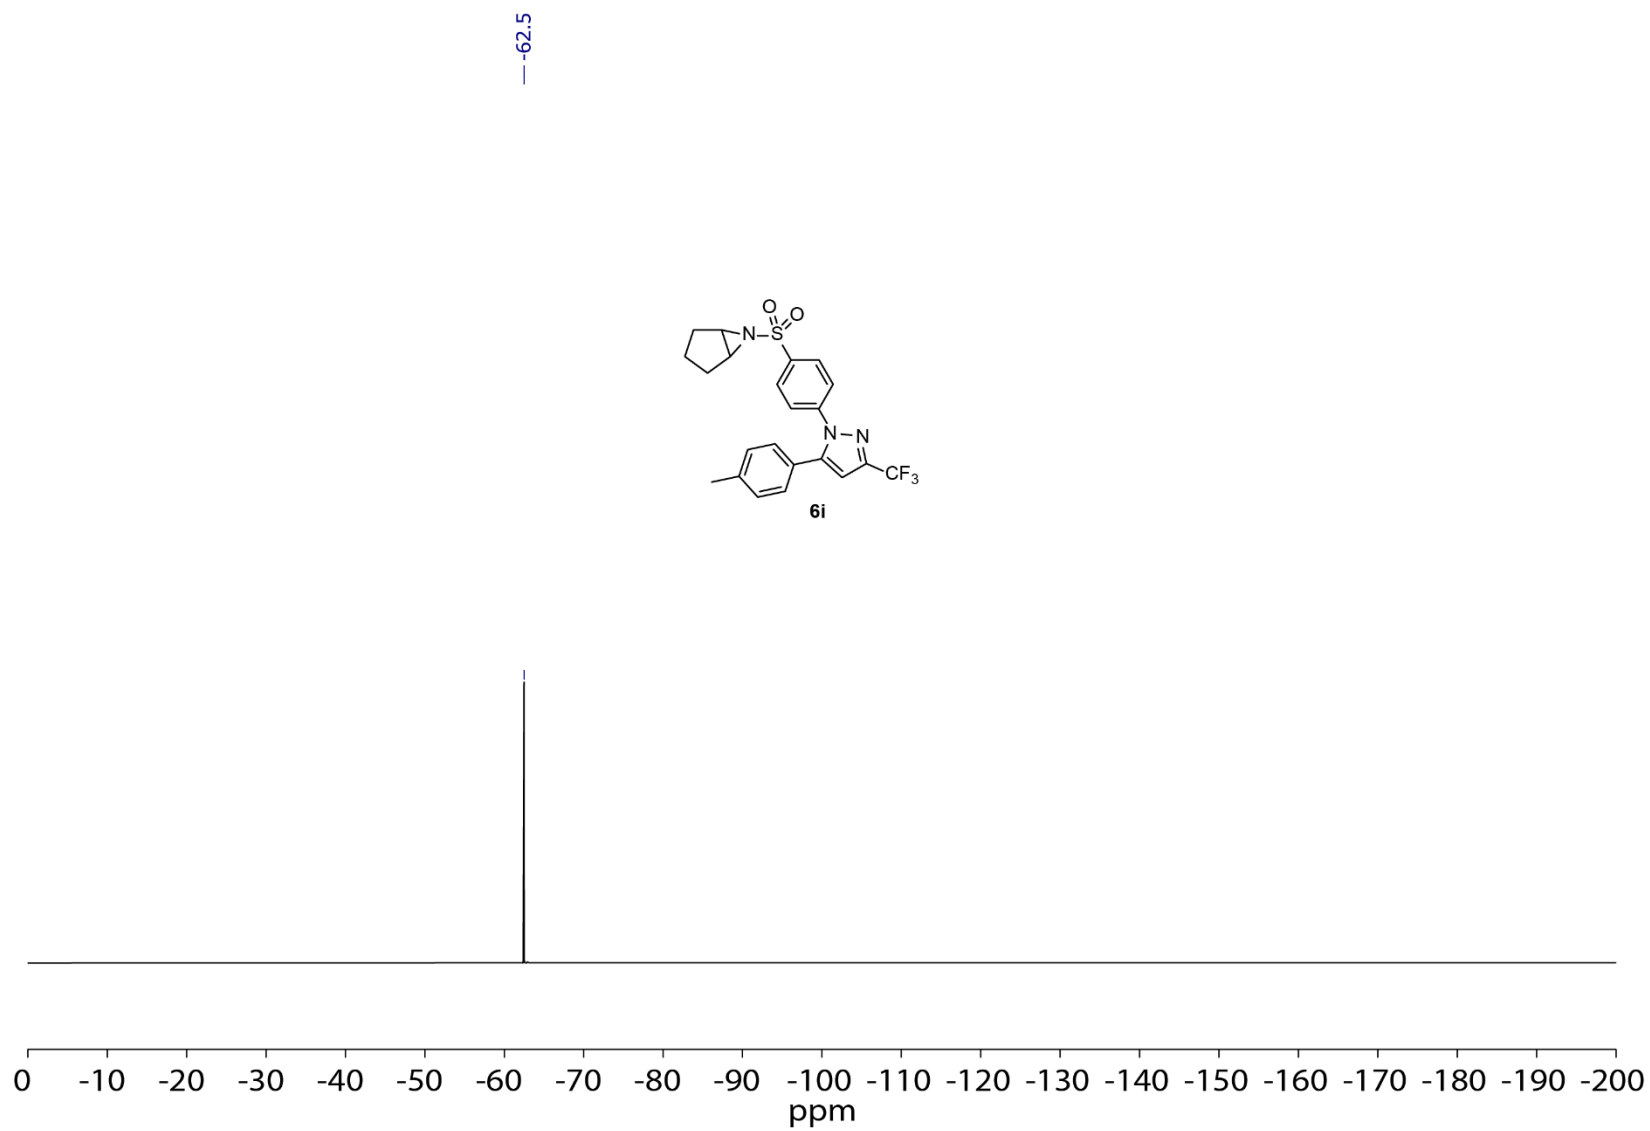

**Figure S34.**  $^{19}\text{F}$  NMR spectrum of 6-((4-(5-(*p*-tolyl)-3-(trifluoromethyl)-1*H*-pyrazol-1-yl)phenyl)sulfonyl)-6-azabicyclo[3.1.0]hexane (**6i**) in  $\text{CDCl}_3$  (377 MHz) at 23 °C.

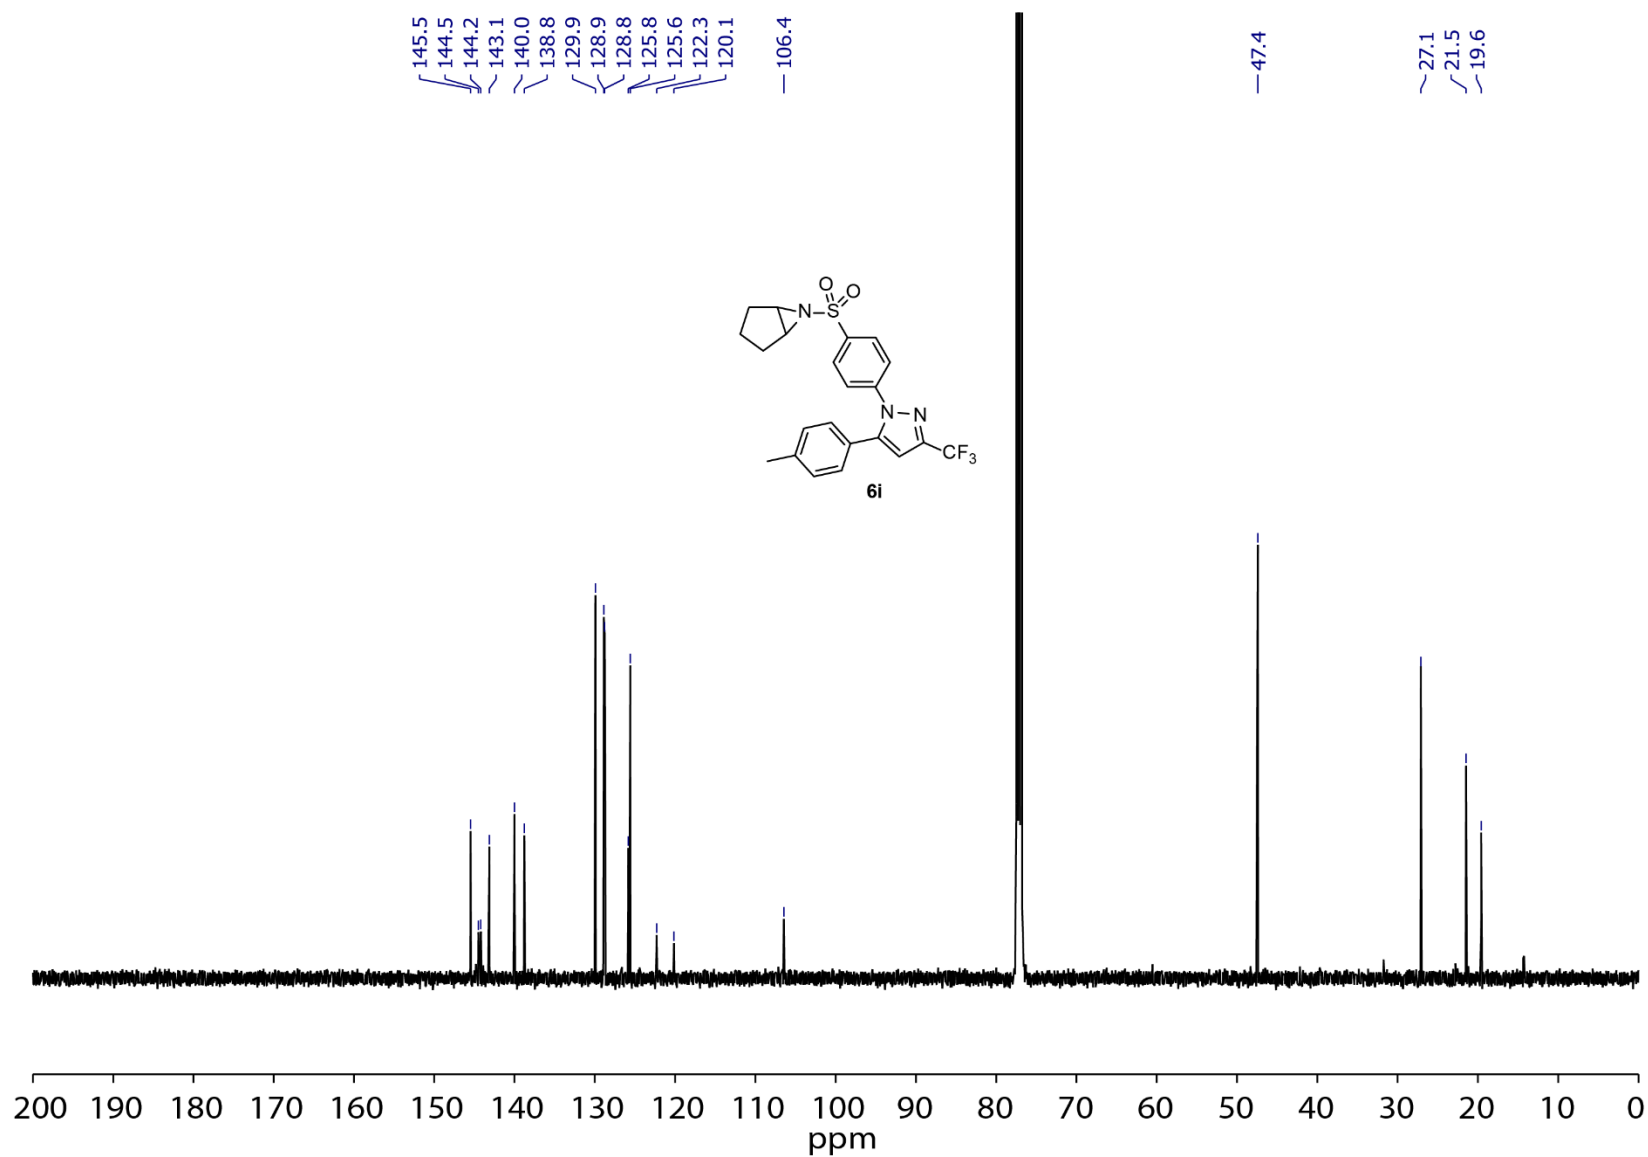

**Figure S35.** <sup>13</sup>C NMR spectrum of 6-((4-(5-(*p*-tolyl)-3-(trifluoromethyl)-1*H*-pyrazol-1-yl)phenyl)sulfonyl)-6-azabicyclo[3.1.0]hexane (**6i**) in CDCl<sub>3</sub> (126 MHz) at 23 °C.

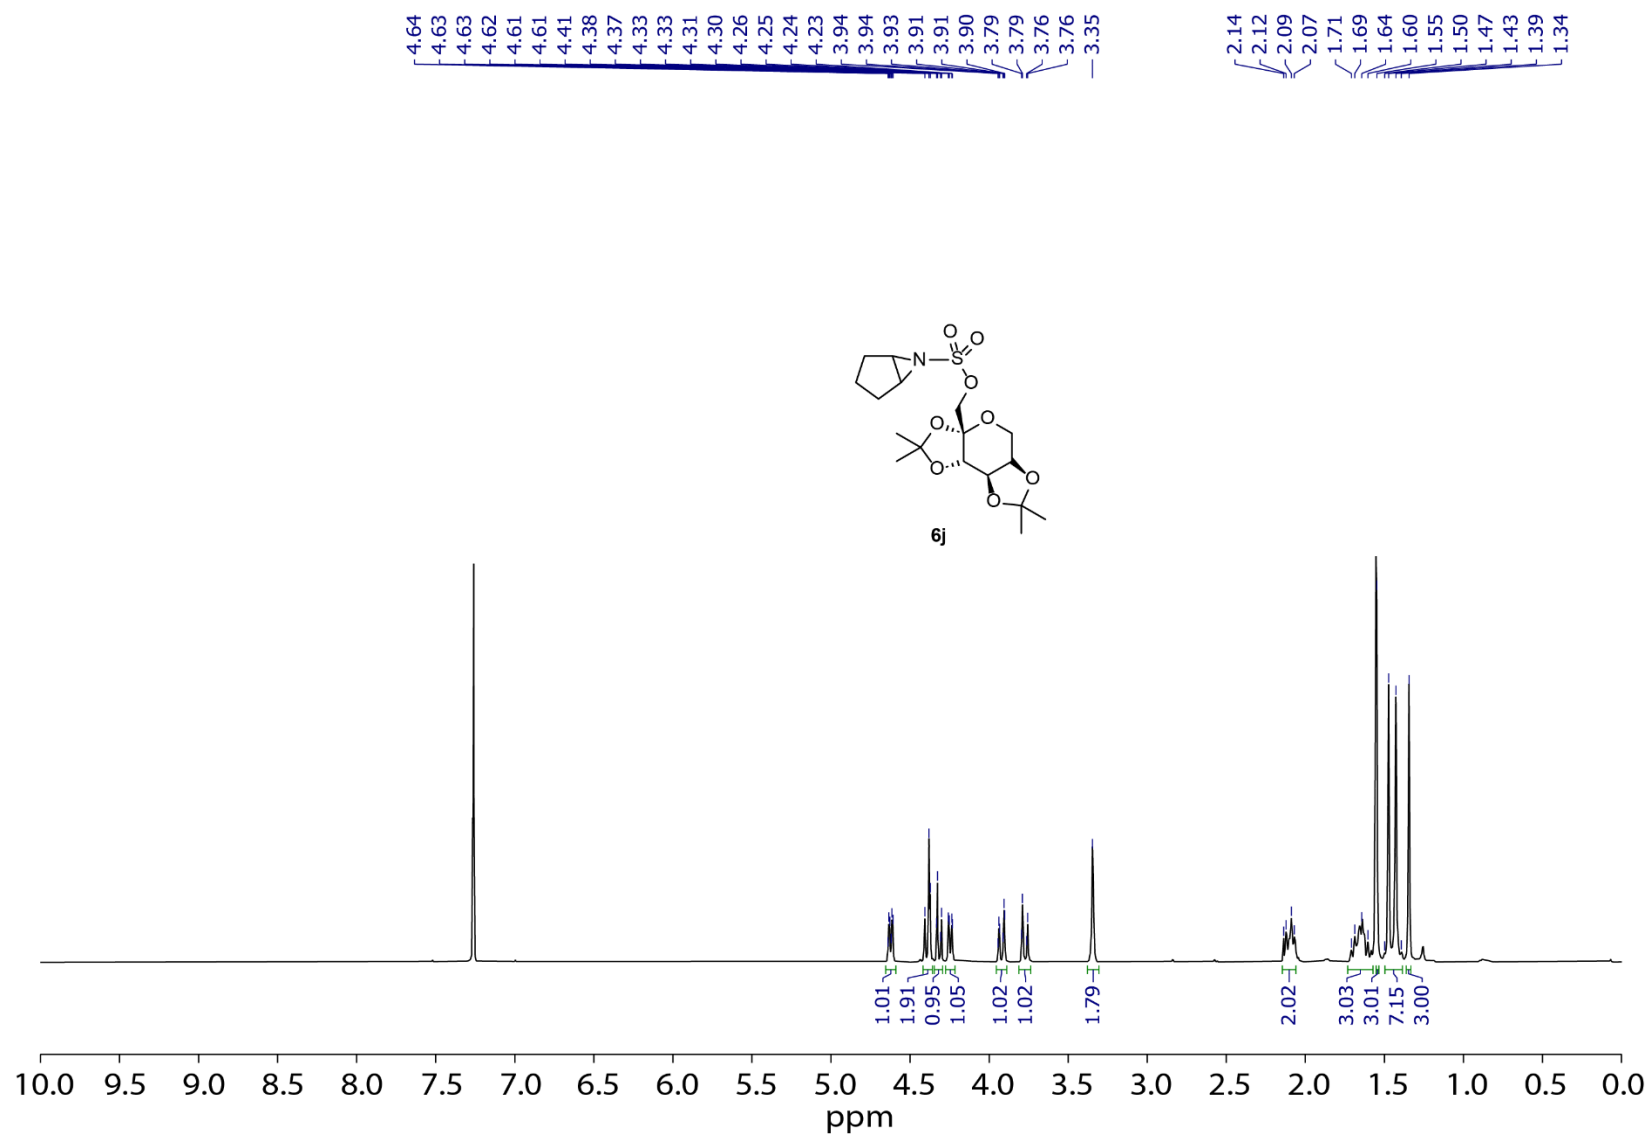

**Figure S36.** <sup>1</sup>H NMR spectrum of ((3a*S*,5a*S*,8a*R*,8b*S*)-2,2,7,7-tetramethyltetrahydro-3a*H*-bis([1,3]dioxolo)[4,5-*b*:4',5'-*d*]pyran-3a-yl)methyl 6-azabicyclo[3.1.0]hexane-6-sulfonate (**6j**) in CDCl<sub>3</sub> (400 MHz) at 23 °C.

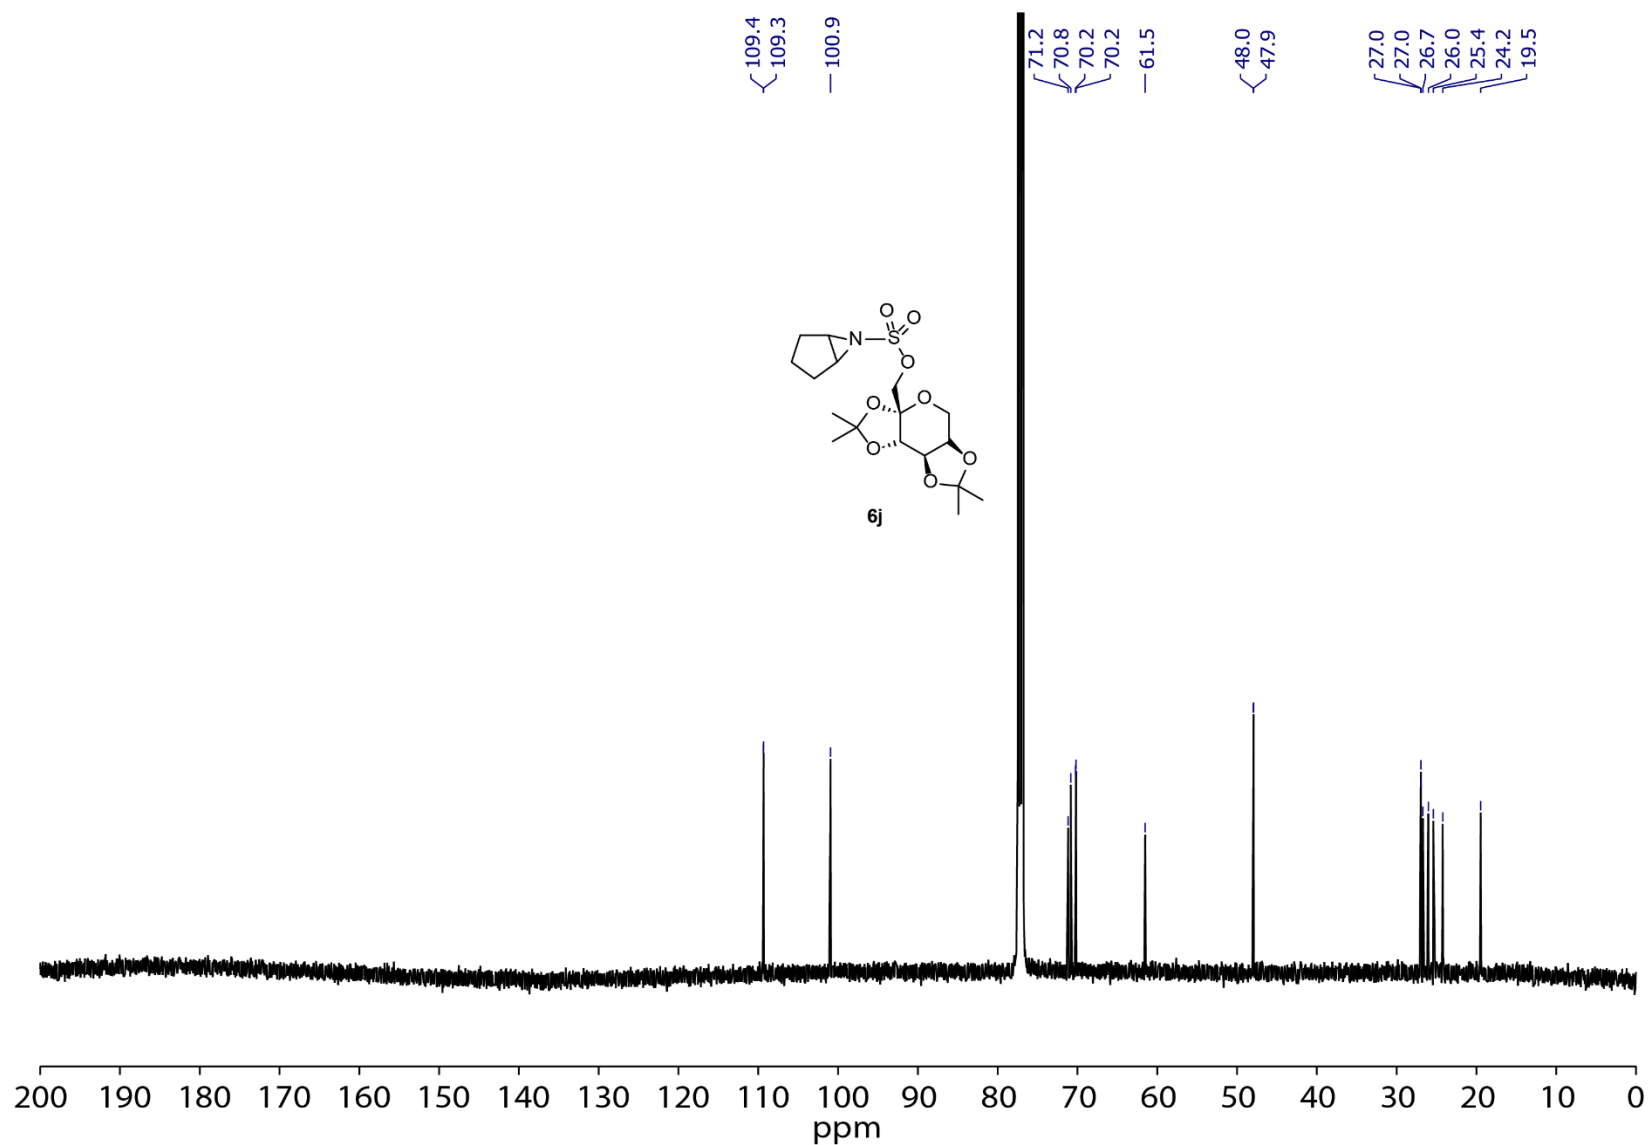

**Figure S37.** <sup>13</sup>C NMR spectrum of ((3a*S*,5a*S*,8a*R*,8b*S*)-2,2,7,7-tetramethyltetrahydro-3a*H*-bis([1,3]dioxolo)[4,5-*b*:4',5'-*d*]pyran-3a-yl)methyl 6-azabicyclo[3.1.0]hexane-6-sulfonate (**6j**) in CDCl<sub>3</sub> (126 MHz) at 23 °C.

## F. Supplementary References

1. Armarego, W. L. F.; Chai, C. L. L. Chapter 4 - Purification of Organic Chemicals. In *Purification of Laboratory Chemicals (Sixth Edition)*, Armarego, W. L. F.; Chai, C. L. L., Eds. Butterworth-Heinemann: Oxford, 2009; pp 88–444.
2. Pangborn, A. B.; Giardello, M. A.; Grubbs, R. H.; Rosen, R. K.; Timmers, F. J. *Organometallics* **1996**, *15*, 1518–1520.
3. Tan, H.; Thai, P.; Sengupta, U.; Deavenport, I. R.; Kucifer, C. M.; Powers, D. C. Metal-Free Aziridination of Unactivated Olefins via Transient *N*-Pyridinium Iminoiodinanes. *ChemRxiv* **2024**, 10.26434/chemrxiv-2024-s8gcj.
4. Müller, P.; Baud, C.; Jacquier, Y. *Can. J. Chem.* **1998**, *76*, 738–750.
5. Youn, S. W.; Pastine, S. J.; Sames, D. *Org. Lett.* **2004**, *6*, 581–584.
6. Li, M.; Jin, Y.; Chen, Y.; Wu, W.; Jiang, H. *J. Am. Chem. Soc.* **2023**, *145*, 9448–9453.
7. Fulmer, G. R.; Miller, A. J. M.; Sherden, N. H.; Gottlieb, H. E.; Nudelman, A.; Stoltz, B. M.; Bercaw, J. E.; Goldberg, K. I. *Organometallics* **2010**, *29*, 2176–2179.
8. Wang, P.; Luchowska-Stańska, U.; van Basten, B.; Chen, H.; Liu, Z.; Wiejak, J.; Whelan, P.; Morgan, D.; Lochhead, E.; Barker, G.; Rehmann, H.; Yarwood, S. J.; Zhou, J. *J. Med. Chem.* **2020**, *63*, 5159–5184.
9. Hayashi, E.; Yamaguchi, Y.; Kita, Y.; Kamata, K.; Hara, M. *Chem. Commun.* **2020**, *56*, 2095–2098.
10. Pagnozzi, D.; Pala, N.; Biossa, G.; Dallochio, R.; Dessì, A.; Singh, P. K.; Rogolino, D.; Di Fiore, A.; De Simone, G.; Supuran, C. T.; Sechi, M. *ACS Med. Chem. Lett.* **2022**, *13*, 271–277.
11. Jurberg, I. D.; Nome, R. A.; Crespi, S.; Atvars, T. D. Z.; König, B. *Adv. Synth. Catal.* **2022**, *364*, 4061–4068.
12. van Leest, N. P.; Grooten, L.; van der Vlugt, J. I.; de Bruin, B. *Chem. Eur. J.* **2019**, *25*, 5987–5993.
13. Nakanishi, M.; Salit, A.-F.; Bolm, C. Iron-Catalyzed Aziridination Reactions. *Adv. Synth. Catal.* **2008**, *350*, 1835–1840.
14. Sunagawa, S.; Morisaki, F.; Baba, T.; Tsubouchi, A.; Yoshimura, A.; Miyamoto, K.; Uchiyama, M.; Saito, A. *Org. Lett.* **2022**, *24*, 5230–5234.
15. Yang, S.; Hu, H.; Chen, M. *Org. Lett.* **2023**, *25*, 7968–7973.
16. Chen, M.; Wu, Z. J.; Song, J.; Xu, H. C. *Angew. Chem. Int. Ed.* **2022**, *61*, e202115954.
17. Li, X.; He, S.; Song, Q. *Org. Lett.* **2021**, *23*, 2994–2999.
18. Yoshimura, A.; Nemykin, V. N.; Zhdankin, V. V. *Chem. Eur. J.* **2011**, *17*, 10538–10541.
19. Park, S.; Koo, J.; Kim, W.; Lee, H. G. *Chem. Commun.* **2022**, *58*, 3767–3770.
20. Steiman, T. J.; Liu, J.; Mengiste, A.; Doyle, A. G. *J. Am. Chem. Soc.* **2020**, *142*, 7598–7605.
21. Liu, M. S.; Du, H. W.; Cui, J. F.; Shu, W. *Angew. Chem.* **2022**, *134*, e202209929.
22. Davies, J.; Janssen-Müller, D.; Zimin, D. P.; Day, C. S.; Yanagi, T.; Elfert, J.; Martin, R. *J. Am. Chem. Soc.* **2021**, *143*, 4949–4954.
23. Gross, P.; Im, H.; Laws III, D.; Park, B.; Baik, M.-H.; Blakey, S. B. *J. Am. Chem. Soc.* **2024**, *146*, 1447–1454.
24. Kirby, G.; Grimaud, L.; Vitale, M. R.; Prestat, G.; Berhal, F. *Green Chem.* **2021**, *23*, 9428–9432.
25. Wang, J.; Luo, M. P.; Gu, Y. J.; Liu, Y. Y.; Yin, Q.; Wang, S. G. *Angew. Chem. Int. Ed.* **2024**, *63*, e202400502.

26. Lux, M. C.; Jurczyk, J.; Lam, Y.-h.; Song, Z. J.; Ma, C.; Roque, J. B.; Ham, J. S.; Sciammetta, N.; Adpressa, D.; Sarpong, R. *Org. Lett.* **2020**, *22*, 6578–6583.
27. Li, Y.; He, J.; Khankhoje, V.; Herdtweck, E.; Köhler, K.; Storcheva, O.; Cokoja, M.; Kühn, F. E. *Dalton Trans.* **2011**, *40*, 5746–5754.
28. Verma, K.; Mishra, M.; Maharana, P. K.; Bhattacharyya, H.; Saha, S.; Punniyamurthy, T. *Org. Lett.* **2023**, *25*, 7933–7938.
29. O'Brien, P.; Pilgram, C. D. *Org. Biomol. Chem.* **2003**, *1*, 523–534.
30. Lardy, C.; Guerrier, D.; Chavernac, G.; Collonges, F., Substituted sulfonamides, process of preparation and medicines containing same. U.S. Patent 5,387,709, Feb 15, 1995.
31. Xu, Q.; Appella, D. H. *Org. Lett.* **2008**, *10*, 1497–1500.
